# Supplementary material for: Rare Pathogenic Variants in Pooled Whole-Exome Sequencing Data Suggest Ciliary Defects and Hyperammoniemia as Possible Causes of Dementia Not Classified as Alzheimer’s Disease or Frontomteporal Dementia
Source: Preprints.org preprint supplement (doi:10.20944/preprints202403.0851.v1), 2024-03-14
Supplement: Supplementary file 3 [file supplementary]

## Sheet: Table S1
Supplementary material: Table S1. Pooled WES variants in 91 patinets with non-AD, non-FTD dementia
Chromosome	Start position	End position	Reference allele	Alternative allele	Type	Function, reference genome	Gene	Exonic function, reference genome	dbSNP	ClinVar_SIGNIFICANCE	ClinVar_DISEASE	gnomAD_exome_NFE	gnomAD_genome_NFE	Read depth (DP)	Alternative allele observations (AO)	Reference allele observations (RO)	FREQUENCY
chr1	169796957	169796957	G	A	snp	exonic	C1orf112	nonsynonymous SNV	rs756035700			8.97E-06		7127	2	7125	0.000280623
chr1	169796886	169796886	T	C	snp	exonic	C1orf112	synonymous SNV	rs561420980			0		6959	2	6957	0.000287398
chr10	90768741	90768741	G	A	snp	exonic	FAS	nonsynonymous SNV	rs753670814			0		6467	2	6465	0.000309262
chr10	90768743	90768743	C	A	snp	exonic	FAS	nonsynonymous SNV	rs574338716	not provided\x2cUncertain significance	not_specified\x2cAutoimmune_lymphoproliferative_syndrome	8.96E-06	0	6452	2	6450	0.000309981
chr11	67048288	67048288	G	A	snp	intronic	GRK2		rs571926031			8.97E-06		6450	2	6447	0.000310126
chr1	169796973	169796973	G	A	snp	exonic	C1orf112	synonymous SNV	rs755094260			0		6413	2	6411	0.000311867
chr11	67048250	67048250	T	C	snp	exonic	GRK2	nonsynonymous SNV	rs55696045			0	0	5812	2	5810	0.000344116
chr1	169797002	169797002	C	T	snp	intronic	C1orf112		rs760106012			0		5090	2	5087	0.000393005
chr3	134885817	134885817	C	T	snp	exonic	EPHB1	synonymous SNV	rs369483622			5.38E-05	0.0001	4974	2	4972	0.000402091
chr17	21318793	21318793	G	A	snp	exonic	KCNJ12;KCNJ18	nonsynonymous SNV	rs201403828			8.96E-06	0	4819	2	4817	0.000415024
chr11	1213285	1213285	G	A	snp	exonic	MUC5AC	unknown	rs539325897			4.76E-05	0	4745	2	4742	0.000421585
chr17	21319332	21319332	C	T	snp	exonic	KCNJ12;KCNJ18	synonymous SNV	rs782389070			0		4727	2	4725	0.000423101
chr17	21319342	21319342	G	A	snp	exonic	KCNJ12;KCNJ18	nonsynonymous SNV	rs111766997			0	0	4713	2	4711	0.000424358
chr9	90584197	90584197	T	A	snp	exonic	CDK20	nonsynonymous SNV	rs748821346			3.58E-05		4603	2	4600	0.000434594
chr17	21319305	21319305	C	A	snp	exonic	KCNJ12;KCNJ18	nonsynonymous SNV	rs782049190			0	6.67E-05	4559	2	4557	0.000438693
chr17	21319294	21319294	C	T	snp	exonic	KCNJ12;KCNJ18	nonsynonymous SNV	rs782232946			0	0	4480	2	4478	0.000446429
chr1	152328703	152328703	T	C	snp	exonic	FLG2	nonsynonymous SNV	rs770734068			0	0	4462	2	4460	0.000448229
chr11	1213366	1213366	C	T	snp	exonic	MUC5AC	unknown	rs555342187			1.90E-05	6.66E-05	4415	2	4413	0.000453001
chr11	1213399	1213399	C	T	snp	exonic	MUC5AC	unknown	rs746150561			2.85E-05		4345	2	4343	0.000460299
chr11	1213434	1213434	C	A	snp	exonic	MUC5AC	unknown	rs199982351					4187	2	4183	0.000477897
chr8	144940597	144940597	G	A	snp	exonic	EPPK1	synonymous SNV	rs782544885			0	0	4148	2	4146	0.00048216
chr20	62597698	62597698	G	A	snp	exonic	ZNF512B	nonsynonymous SNV	rs570559377			1.79E-05		4141	2	4138	0.000483092
chr1	152327194	152327194	G	A	snp	exonic	FLG2	nonsynonymous SNV	rs756372412			8.96E-06		4064	2	4061	0.000492247
chr1	144994737	144994737	G	A	snp	ncRNA_intronic	LOC100996724		rs782539219			0	0	4050	2	4047	0.000493949
chr1	152327329	152327329	T	C	snp	exonic	FLG2	nonsynonymous SNV	rs576496683			0	7.77E-05	3964	2	3962	0.000504541
chr6	144508307	144508307	C	T	snp	exonic	STX11	synonymous SNV	rs770109393			0		3947	2	3945	0.000506714
chr20	62597813	62597813	G	C	snp	exonic	ZNF512B	nonsynonymous SNV	rs752767578					3879	2	3877	0.000515597
chr1	144994755	144994755	C	T	snp	ncRNA_intronic	LOC100996724		rs782660593			8.96E-06	6.67E-05	3874	2	3872	0.000516262
chr5	140307025	140307025	C	T	snp	exonic	PCDHAC1	nonsynonymous SNV	rs782460713			8.96E-06		3861	2	3858	0.000518135
chr4	53359	53359	T	C	snp	UTR5	ZNF595;ZNF718		rs763657478			0		3858	2	3856	0.000518403
chr16	70190567	70190567	G	A	snp	exonic	PDPR	nonsynonymous SNV	rs779812513			0		3810	2	3807	0.000525072
chr20	62597667	62597667	G	A	snp	exonic	ZNF512B	synonymous SNV	rs3752314			8.96E-06	0	3802	2	3800	0.000526039
chr17	21319225	21319225	G	A	snp	exonic	KCNJ12;KCNJ18	nonsynonymous SNV	rs782447554			0		3794	2	3792	0.000527148
chr1	152327389	152327389	G	T	snp	exonic	FLG2	nonsynonymous SNV	rs12411129			0.0002	0.0001	3787	2	3785	0.000528123
chr8	144940532	144940532	T	C	snp	exonic	EPPK1	nonsynonymous SNV	rs782162646			0		3783	2	3781	0.000528681
chr8	144940531	144940531	C	T	snp	exonic	EPPK1	synonymous SNV	rs782023287			0	0	3767	2	3765	0.000530926
chr12	120616465	120616465	G	A	snp	exonic	GCN1	nonsynonymous SNV	rs748255642			0	0	3765	2	3763	0.000531208
chr3	134885754	134885754	G	A	snp	intronic	EPHB1		rs766245714			0		3761	2	3759	0.000531773
chr17	21318736	21318736	G	A	snp	exonic	KCNJ12;KCNJ18	nonsynonymous SNV	rs141709114			0	0	3757	2	3755	0.00053234
chr17	21318895	21318895	C	T	snp	exonic	KCNJ12;KCNJ18	nonsynonymous SNV	rs782136725			4.48E-05	0	3720	2	3718	0.000537634
chr1	144994766	144994766	G	A	snp	ncRNA_intronic	LOC100996724		rs782168088			0		3716	2	3714	0.000538213
chr16	29994886	29994886	G	A	snp	exonic	TAOK2	synonymous SNV	rs61739161			3.58E-05	0	3683	2	3681	0.000543036
chr7	100635193	100635193	C	T	snp	exonic	MUC12	nonsynonymous SNV	rs145648974			1.72E-05	6.67E-05	3677	2	3674	0.00054407
chr7	100635187	100635187	C	A	snp	exonic	MUC12	nonsynonymous SNV	rs369253572			0	0	3635	2	3633	0.000550206
chr17	21318892	21318892	T	C	snp	exonic	KCNJ12;KCNJ18	nonsynonymous SNV	rs781993303			8.95E-06		3633	2	3631	0.000550509
chr4	53370	53370	C	A	snp	UTR5	ZNF595;ZNF718		rs749583906			0		3631	2	3629	0.000550812
chr11	123900927	123900927	G	A	snp	exonic	OR10G8	nonsynonymous SNV	rs377572598			0		3625	2	3623	0.000551724
chr7	100635207	100635207	G	A	snp	exonic	MUC12	nonsynonymous SNV	rs542032427			0.0001	6.71E-05	3620	2	3618	0.000552486
chr19	9071279	9071279	G	A	snp	exonic	MUC16	synonymous SNV	rs369606863			1.79E-05		3578	2	3575	0.000559128
chr12	120616496	120616496	C	T	snp	exonic	GCN1	nonsynonymous SNV	rs577485899			2.69E-05	6.66E-05	3555	2	3553	0.000562588
chr1	152327402	152327402	C	T	snp	exonic	FLG2	nonsynonymous SNV	rs12758459				0	3528	2	3526	0.000566893
chr16	70190514	70190514	G	T	snp	exonic	PDPR	nonsynonymous SNV	rs117263218			8.98E-06		3515	2	3513	0.00056899
chr11	123900872	123900872	G	A	snp	exonic	OR10G8	synonymous SNV	rs761269741			8.97E-06		3509	2	3507	0.000569963
chr17	21318906	21318906	G	A	snp	exonic	KCNJ12;KCNJ18	synonymous SNV	rs781897017			0		3493	2	3491	0.000572574
chr20	62597842	62597842	G	A	snp	exonic	ZNF512B	nonsynonymous SNV	rs202032995			1.79E-05		3465	2	3462	0.000577367
chr16	29994927	29994927	G	A	snp	exonic	TAOK2	nonsynonymous SNV	rs774381953			8.96E-06	6.68E-05	3460	2	3458	0.000578035
chr20	62597841	62597841	C	T	snp	exonic	ZNF512B	synonymous SNV	rs191422588			5.37E-05	0.0001	3406	2	3403	0.000587372
chr17	21318714	21318714	G	T	snp	exonic	KCNJ12;KCNJ18	synonymous SNV	rs782732519			0		3400	2	3397	0.000588408
chr12	122255720	122255720	G	A	snp	exonic	SETD1B	nonsynonymous SNV	rs373918253			0	0	3398	2	3396	0.000588582
chr3	134514518	134514518	G	A	snp	exonic	EPHB1	synonymous SNV	rs766352153			1.86E-05	0	3362	2	3360	0.000594884
chr8	144940654	144940654	G	A	snp	exonic	EPPK1	synonymous SNV	rs782594238			9.06E-06	0	3354	2	3352	0.000596303
chr11	123900844	123900844	G	A	snp	exonic	OR10G8	stopgain	rs757567480			5.39E-05		3331	2	3329	0.00060042
chr10	47087129	47087129	A	G	snp	exonic	NPY4R;NPY4R2	nonsynonymous SNV	rs144020985			0		3321	2	3319	0.000602228
chr9	116811385	116811385	C	T	snp	exonic	ZNF618	synonymous SNV	rs62640056			0.0004	0.0005	3307	2	3305	0.000604778
chr11	1213531	1213531	C	T	snp	exonic	MUC5AC	unknown	rs757792438			9.48E-06		3307	2	3305	0.000604778
chr22	19119134	19119134	G	C	snp	exonic	TSSK2	nonsynonymous SNV	rs202065494			0	0	3280	2	3278	0.000609756
chr22	19119161	19119161	C	T	snp	exonic	TSSK2	synonymous SNV	rs75077908			3.61E-05	0.0001	3270	2	3268	0.000611621
chr16	88783499	88783499	G	A	snp	exonic	PIEZO1	nonsynonymous SNV	rs769127466			0		3262	2	3259	0.000613309
chr3	134514507	134514507	G	A	snp	exonic	EPHB1	nonsynonymous SNV	rs372758942			0	0	3252	2	3250	0.000615006
chr6	34100856	34100856	C	T	snp	exonic	GRM4	nonsynonymous SNV	rs770741890			5.39E-05		3242	2	3240	0.000616903
chr8	41790212	41790212	C	T	snp	exonic	KAT6A	synonymous SNV	rs146496080			0.0009	0.0007	3234	2	3232	0.000618429
chr9	138662218	138662218	G	A	snp	exonic	KCNT1	nonsynonymous SNV	rs769855266			0.0001	0.0002	3228	2	3226	0.000619579
chr5	131607852	131607852	C	T	snp	exonic	PDLIM4	nonsynonymous SNV	rs867265087					3223	2	3220	0.000620732
chr5	172387081	172387081	C	T	snp	intronic	RPL26L1		rs755838982			1.82E-05		3221	2	3219	0.000620925
chr1	109795276	109795276	G	A	snp	exonic	CELSR2	nonsynonymous SNV	rs201283895			1.79E-05	6.67E-05	3218	2	3216	0.000621504
chr14	20248844	20248844	C	T	snp	exonic	OR4M1	synonymous SNV	rs772061087			8.95E-06		3216	2	3214	0.000621891
chr1	152327044	152327044	T	A	snp	exonic	FLG2	nonsynonymous SNV	rs759478638			3.58E-05		3215	2	3213	0.000622084
chr15	20446050	20446050	G	A	snp	intergenic	NONE;CHEK2P2		rs28532993				6.66E-05	4821	3	4818	0.000622278
chr5	140811069	140811069	G	A	snp	exonic	PCDHGA12	nonsynonymous SNV	rs749812839			9.00E-06		3213	2	3211	0.000622471
chr1	109795283	109795283	A	G	snp	exonic	CELSR2	nonsynonymous SNV	rs377135836			0		3208	2	3206	0.000623441
chr1	144994781	144994781	G	T	snp	ncRNA_intronic	LOC100996724		rs782426946			8.95E-06		3195	2	3193	0.000625978
chr5	131607854	131607854	C	T	snp	exonic	PDLIM4	nonsynonymous SNV	rs201095342			1.79E-05	6.67E-05	3191	2	3189	0.000626763
chr14	105452925	105452925	A	G	snp	exonic	C14orf79	nonsynonymous SNV	rs374324729			0	0	3187	2	3185	0.000627549
chr7	86415877	86415877	G	A	snp	exonic	GRM3	nonsynonymous SNV	rs571579021			8.98E-06	0	3184	2	3182	0.000628141
chr19	4511817	4511817	C	T	snp	exonic	PLIN4	nonsynonymous SNV	rs531304697			8.95E-06		3175	2	3173	0.000629921
chr1	152327785	152327785	C	T	snp	exonic	FLG2	nonsynonymous SNV	rs749047338			8.06E-05	0	3172	2	3170	0.000630517
chr8	41790191	41790191	C	T	snp	exonic	KAT6A	nonsynonymous SNV	rs779291638			8.96E-06		3160	2	3158	0.000632911
chr1	33354711	33354711	C	T	snp	exonic	HPCA	nonsynonymous SNV	rs775863165	Pathogenic	Dystonia_2\x2c_torsion\x2c_autosomal_recessive	0		3159	2	3156	0.000633312
chr22	50279941	50279941	C	T	snp	exonic	ZBED4	synonymous SNV	rs115601990			2.08E-05	6.66E-05	3153	2	3151	0.000634317
chr4	3449314	3449314	C	T	snp	exonic	HGFAC	nonsynonymous SNV	rs139244166			9.88E-05	6.68E-05	3152	2	3150	0.000634518
chr10	47086981	47086981	T	C	snp	exonic	NPY4R;NPY4R2	synonymous SNV	rs782821178			0	0	3145	2	3143	0.00063593
chr6	144508159	144508159	A	G	snp	exonic	STX11	nonsynonymous SNV	rs754792321			9.10E-06		3143	2	3141	0.000636335
chr18	44260299	44260299	C	T	snp	exonic	ST8SIA5	synonymous SNV	rs148495308			8.97E-06	0	3139	2	3137	0.000637146
chr1	152323650	152323650	G	A	snp	exonic	FLG2	synonymous SNV	rs143357607			0.0006	0.0014	3138	2	3135	0.000637552
chr12	40878732	40878732	G	T	snp	exonic	MUC19	unknown	rs573697083				0	3135	2	3133	0.000637959
chr5	488464	488464	G	A	snp	exonic	SLC9A3	synonymous SNV	rs765455835			9.08E-06		3131	2	3128	0.000638978
chr19	4511449	4511449	G	A	snp	exonic	PLIN4	synonymous SNV	rs573011781			5.54E-05	9.20E-05	3126	2	3123	0.00064
chr8	41790190	41790190	G	A	snp	exonic	KAT6A	nonsynonymous SNV	rs866001782					3123	2	3121	0.00064041
chr4	37636643	37636643	C	T	snp	exonic	RELL1	synonymous SNV	rs114293577			3.58E-05	6.66E-05	3121	2	3119	0.00064082
chr8	41790306	41790306	G	A	snp	exonic	KAT6A	nonsynonymous SNV	rs202113307			2.69E-05	0	3117	2	3115	0.000641643
chr19	30935506	30935506	G	A	snp	exonic	ZNF536	nonsynonymous SNV	rs139757559			9.01E-06		3110	2	3108	0.000643087
chr1	35227143	35227143	C	T	snp	exonic	GJB4	synonymous SNV	rs375850517			1.79E-05		3105	2	3103	0.000644122
chr3	138763079	138763079	C	T	snp	exonic	PRR23C	synonymous SNV	rs534813947			0		3104	2	3102	0.00064433
chr4	7056076	7056076	C	T	snp	exonic	TADA2B	synonymous SNV	rs202116024			0	0	3096	2	3094	0.000645995
chr1	109795243	109795243	G	A	snp	exonic	CELSR2	nonsynonymous SNV	rs572525434					3093	2	3091	0.000646621
chr1	35227137	35227137	C	T	snp	exonic	GJB4	synonymous SNV	rs528006662			8.07E-05	6.67E-05	3087	2	3085	0.000647878
chr1	33354694	33354694	C	T	snp	exonic	HPCA	synonymous SNV	rs190500642			5.37E-05	0	3079	2	3077	0.000649562
chr16	19195034	19195034	C	T	snp	exonic	SYT17	synonymous SNV	rs774987736			8.95E-06		3072	2	3070	0.000651042
chr1	249142586	249142586	G	A	snp	exonic	ZNF672	synonymous SNV	rs774742768			0		3059	2	3057	0.000653808
chr6	144508149	144508149	C	T	snp	exonic	STX11	nonsynonymous SNV	rs369572255			0	0	3057	2	3055	0.000654236
chr1	152326915	152326915	C	T	snp	exonic	FLG2	nonsynonymous SNV	rs768873537			8.96E-06		3049	2	3047	0.000655953
chr1	152328617	152328617	C	A	snp	exonic	FLG2	nonsynonymous SNV	rs767044488			0	0	4569	3	4566	0.000656599
chr1	169796934	169796934	G	A	snp	exonic	C1orf112	synonymous SNV	rs766827498			0		7612	5	7607	0.000656858
chr1	249142583	249142583	C	T	snp	exonic	ZNF672	synonymous SNV	rs148117045			1.81E-05		3040	2	3038	0.000657895
chr3	48698353	48698353	C	T	snp	exonic	CELSR3	nonsynonymous SNV	rs754895348			0	6.67E-05	3035	2	3033	0.000658979
chr1	33354763	33354763	G	A	snp	exonic	HPCA	synonymous SNV	rs779976786			5.37E-05	6.66E-05	3029	2	3027	0.000660284
chr1	152327593	152327593	C	A	snp	exonic	FLG2	nonsynonymous SNV	rs370349464					3027	2	3025	0.00066072
chr15	22466200	22466200	A	G	snp	ncRNA_exonic	IGHV1OR15-3;LOC642131		rs373529646			0	0	3027	2	3025	0.00066072
chr18	44260332	44260332	G	A	snp	exonic	ST8SIA5	synonymous SNV	rs756333494			0		3013	2	3011	0.00066379
chr5	488488	488488	G	A	snp	exonic	SLC9A3	synonymous SNV	rs372327507			1.81E-05	0.0001	3006	2	3004	0.000665336
chr16	88783539	88783539	G	A	snp	exonic	PIEZO1	synonymous SNV	rs529610695			0	6.67E-05	3006	2	3004	0.000665336
chr11	6592085	6592085	G	A	snp	exonic	DNHD1	nonsynonymous SNV	rs747701056			8.96E-06		2999	2	2997	0.000666889
chr1	152327427	152327427	A	T	snp	exonic	FLG2	synonymous SNV	rs772433761			9.31E-06	0.0003	2996	2	2994	0.000667557
chr7	1784444	1784444	G	A	snp	exonic	ELFN1	nonsynonymous SNV	rs746674332			0		2990	2	2988	0.000668896
chr4	134071799	134071799	C	A	snp	exonic	PCDH10	synonymous SNV	rs369955619			9.02E-06		2989	2	2987	0.00066912
chr7	1784467	1784467	T	A	snp	exonic	ELFN1	nonsynonymous SNV	rs763479740			0		2986	2	2984	0.000669792
chr19	45477788	45477788	C	T	snp	exonic	CLPTM1	synonymous SNV	rs368747304			2.69E-05		2981	2	2979	0.000670916
chr19	4511503	4511503	G	A	snp	exonic	PLIN4	synonymous SNV	rs745340814			8.98E-06	0	2979	2	2977	0.000671366
chr19	18546444	18546444	C	T	snp	exonic	ISYNA1	nonsynonymous SNV	rs778239804			0		2971	2	2969	0.000673174
chr7	1784454	1784454	C	T	snp	exonic	ELFN1	synonymous SNV	rs370472465			4.17E-05		2970	2	2968	0.000673401
chr19	18546676	18546676	G	A	snp	exonic	ISYNA1	nonsynonymous SNV	rs756610944			0		2970	2	2968	0.000673401
chr15	22368958	22368958	G	A	snp	exonic	OR4M2	nonsynonymous SNV	rs562609016			0	0	2965	2	2963	0.000674536
chr12	40879840	40879840	C	A	snp	exonic	MUC19	unknown	rs74076599				6.80E-05	2959	2	2957	0.000675904
chr12	40879757	40879757	A	G	snp	exonic	MUC19	unknown	rs540379035				0	2958	2	2956	0.000676133
chr17	21319389	21319389	G	A	snp	exonic	KCNJ12;KCNJ18	synonymous SNV	rs774272694			5.37E-05	0	4434	3	4430	0.000676743
chr9	135073610	135073610	C	T	snp	exonic	NTNG2	synonymous SNV	rs370506631			1.82E-05		2955	2	2953	0.000676819
chr9	138662270	138662270	C	T	snp	exonic	KCNT1	synonymous SNV	rs763438119			5.42E-05		2953	2	2950	0.000677507
chr19	45477803	45477803	C	T	snp	exonic	CLPTM1	synonymous SNV	rs761786489			0	0	2950	2	2948	0.000677966
chr19	9068198	9068198	C	A	snp	exonic	MUC16	nonsynonymous SNV	rs765628517			0		2950	2	2948	0.000677966
chr4	7056037	7056037	C	T	snp	exonic	TADA2B	synonymous SNV	rs772594478			0		2945	2	2943	0.000679117
chr1	27333199	27333199	C	T	snp	exonic	FAM46B	nonsynonymous SNV	rs374387124			3.59E-05	0	2940	2	2938	0.000680272
chr17	80054221	80054221	G	A	snp	exonic	FASN	nonsynonymous SNV	rs758488529			4.49E-05	6.68E-05	2933	2	2931	0.000681896
chr1	155279985	155279985	C	T	snp	exonic	FDPS	nonsynonymous SNV	rs187176543			0		2929	2	2927	0.000682827
chr16	19195022	19195022	C	T	snp	exonic	SYT17	synonymous SNV	rs140587743			0	0	2918	2	2916	0.000685401
chr1	152280701	152280701	T	C	snp	exonic	FLG	nonsynonymous SNV	rs770990383			0		2918	2	2916	0.000685401
chr1	152280702	152280702	A	G	snp	exonic	FLG	synonymous SNV	rs370632128			8.95E-06		2916	2	2914	0.000685871
chr4	53334	53334	G	T	snp	UTR5	ZNF595;ZNF718		rs763789876			0.0001	0	4367	3	4364	0.00068697
chr11	6592135	6592135	G	A	snp	exonic	DNHD1	nonsynonymous SNV	rs535774333			1.79E-05		2911	2	2909	0.000687049
chr9	138662271	138662271	G	A	snp	exonic	KCNT1	nonsynonymous SNV	rs200110001			9.04E-06	0	2910	2	2908	0.000687285
chr11	1213400	1213400	G	A	snp	exonic	MUC5AC	unknown	rs769858526			9.50E-06	0	4353	3	4349	0.000689338
chr19	4511422	4511422	C	A	snp	exonic	PLIN4	synonymous SNV	rs779147065					2901	2	2899	0.000689417
chr3	52522395	52522395	C	T	snp	exonic	NISCH	nonsynonymous SNV	rs765671389			0		2900	2	2898	0.000689655
chr11	6592051	6592051	A	G	snp	exonic	DNHD1	nonsynonymous SNV	rs376214640			0		2898	2	2896	0.000690131
chr1	249142558	249142558	C	T	snp	exonic	ZNF672	nonsynonymous SNV	rs868235035					2889	2	2887	0.000692281
chr9	138662188	138662188	G	A	snp	exonic	KCNT1	nonsynonymous SNV	rs764477306	Uncertain significance	not_provided	9.04E-06		2885	2	2883	0.000693241
chr15	22483062	22483062	T	A	snp	intergenic	IGHV1OR15-3;MIR1268A		rs377080023			0	0	2883	2	2881	0.000693722
chr2	128409054	128409054	G	A	snp	exonic	GPR17	nonsynonymous SNV	rs761381132			8.07E-05	0.0002	2878	2	2876	0.000694927
chr7	1784502	1784502	C	T	snp	exonic	ELFN1	synonymous SNV	rs767656349					2878	2	2876	0.000694927
chr22	19119280	19119280	C	T	snp	exonic	TSSK2	nonsynonymous SNV	rs778238329			0		2878	2	2876	0.000694927
chr12	120616372	120616372	G	A	snp	intronic	GCN1		rs373163169					2873	2	2871	0.000696136
chr11	3848889	3848889	C	T	snp	exonic	RHOG	synonymous SNV	rs761360919			0		2873	2	2871	0.000696136
chr11	1261481	1261481	C	T	snp	exonic	MUC5B	synonymous SNV	rs141821939			0.0007	0.0007	2859	2	2857	0.000699545
chr12	40878949	40878949	T	A	snp	exonic	MUC19	unknown	rs775676830					2856	2	2854	0.00070028
chr22	19119296	19119296	C	T	snp	exonic	TSSK2	synonymous SNV	rs747439680			1.80E-05		2854	2	2852	0.000700771
chr3	52522362	52522362	C	T	snp	exonic	NISCH	synonymous SNV	rs576893915			0		2851	2	2849	0.000701508
chr7	100635063	100635063	C	T	snp	exonic	MUC12	synonymous SNV	rs767989756			3.43E-05		2850	2	2848	0.000701754
chr16	19195125	19195125	G	A	snp	exonic	SYT17	nonsynonymous SNV	rs745725431			0		2849	2	2847	0.000702001
chr19	9068171	9068171	T	C	snp	exonic	MUC16	synonymous SNV	rs749055291			0		2842	2	2840	0.00070373
chr1	152324032	152324032	C	G	snp	exonic	FLG2	nonsynonymous SNV	rs145838203			8.96E-06	0.0001	2840	2	2838	0.000704225
chr7	75617430	75617430	G	A	snp	exonic	TMEM120A	unknown	rs201406245			0.0002	6.68E-05	2839	2	2837	0.000704473
chr4	3449280	3449280	G	A	snp	exonic	HGFAC	nonsynonymous SNV	rs560293902			2.70E-05		2830	2	2828	0.000706714
chrX	70823698	70823698	G	A	snp	exonic	GCNA	nonsynonymous SNV	rs371151044			0	0	2828	2	2826	0.000707214
chr1	27333155	27333155	G	T	snp	exonic	FAM46B	synonymous SNV	rs776149920			0		2827	2	2825	0.000707464
chr17	74288615	74288615	G	T	snp	exonic	QRICH2	synonymous SNV	rs772522094			1.79E-05		2820	2	2818	0.00070922
chr11	7111186	7111186	C	T	snp	exonic	RBMXL2	nonsynonymous SNV	rs143507713			0		2821	2	2818	0.00070922
chr17	21318694	21318694	T	C	snp	exonic	KCNJ12;KCNJ18	nonsynonymous SNV	rs782659521			0		2819	2	2817	0.000709471
chr1	36553349	36553349	C	T	snp	exonic	TEKT2	synonymous SNV	rs199939002			1.80E-05	6.67E-05	2815	2	2813	0.00071048
chr15	22466168	22466168	G	A	snp	ncRNA_exonic	IGHV1OR15-3;LOC642131		rs777124538			9.15E-06		2813	2	2811	0.000710985
chr4	134072630	134072630	C	T	snp	exonic	PCDH10	synonymous SNV	rs766550868			0		2810	2	2808	0.000711744
chr1	152275819	152275819	C	A	snp	exonic	FLG	nonsynonymous SNV	rs780944348			0		2810	2	2808	0.000711744
chr3	52522400	52522400	C	T	snp	exonic	NISCH	synonymous SNV	rs767092707			3.59E-05	0	2798	2	2796	0.000714796
chr12	49221548	49221548	C	T	snp	exonic	CACNB3	nonsynonymous SNV	rs780239343			9.85E-05	0.0001	2798	2	2795	0.000715052
chr3	52522296	52522296	C	T	snp	exonic	NISCH	nonsynonymous SNV	rs201390995			8.07E-05		2796	2	2794	0.000715308
chr17	21207779	21207779	G	A	snp	exonic	MAP2K3	nonsynonymous SNV	rs377202574			0.0001		2790	2	2787	0.000717103
chr18	44260370	44260370	C	T	snp	exonic	ST8SIA5	nonsynonymous SNV	rs768523685			1.81E-05		2786	2	2784	0.000717875
chr15	22483223	22483223	T	C	snp	intergenic	IGHV1OR15-3;MIR1268A		rs755370215			0		2781	2	2779	0.000719166
chr3	48697535	48697535	G	A	snp	exonic	CELSR3	nonsynonymous SNV	rs772028156			1.80E-05		2781	2	2779	0.000719166
chr15	22482968	22482968	G	A	snp	intergenic	IGHV1OR15-3;MIR1268A		rs375265583			0		2780	2	2777	0.000719683
chr19	18546592	18546592	G	T	snp	exonic	ISYNA1	nonsynonymous SNV	rs752367466			0		2778	2	2775	0.000720202
chr19	42873065	42873065	C	T	snp	exonic	MEGF8	synonymous SNV	rs773339356			8.96E-06		2774	2	2772	0.000720981
chr11	3848912	3848912	G	A	snp	exonic	RHOG	nonsynonymous SNV	rs779345601			0		2774	2	2772	0.000720981
chr1	62190767	62190767	G	A	snp	exonic	TM2D1	nonsynonymous SNV	rs776357184			3.69E-05		2772	2	2770	0.000721501
chr22	19119308	19119308	C	T	snp	exonic	TSSK2	synonymous SNV	rs746308938			1.80E-05		2766	2	2764	0.000723066
chr19	42873138	42873138	G	A	snp	exonic	MEGF8	nonsynonymous SNV	rs771136518			2.69E-05	6.67E-05	2766	2	2764	0.000723066
chr14	78709719	78709719	G	A	snp	exonic	NRXN3	nonsynonymous SNV	rs543953600			0	6.67E-05	2763	2	2761	0.000723851
chr3	49168340	49168340	G	A	snp	intronic	LAMB2		rs755426122			2.69E-05	0	2763	2	2761	0.000723851
chr4	124323330	124323330	C	T	snp	exonic	SPRY1	nonsynonymous SNV	rs772009773			8.95E-06		2761	2	2759	0.000724375
chr1	152281744	152281744	T	C	snp	exonic	FLG	nonsynonymous SNV	rs763820426			0	0	2758	2	2756	0.000725163
chr11	500648	500648	G	A	snp	exonic	RNH1	synonymous SNV	rs147473996			2.71E-05	6.67E-05	2755	2	2753	0.000725953
chr1	37947302	37947302	C	G	snp	exonic	ZC3H12A	nonsynonymous SNV	rs770778300			8.95E-06		2753	2	2751	0.00072648
chr6	26431130	26431130	G	A	snp	downstream	BTN2A3P		rs141732335			0.0011	0.0007	2751	2	2749	0.000727008
chr16	19195136	19195136	C	T	snp	exonic	SYT17	synonymous SNV	rs747331467			1.79E-05	0	2748	2	2746	0.000727802
chr1	152324106	152324106	G	A	snp	exonic	FLG2	synonymous SNV	rs140460426			1.79E-05	6.85E-05	2742	2	2740	0.000729395
chr19	18546473	18546473	T	C	snp	exonic	ISYNA1	nonsynonymous SNV	rs746030986			9.12E-06		2742	2	2740	0.000729395
chr5	488422	488422	G	A	snp	intronic	SLC9A3		rs541182998			2.77E-05	0	2738	2	2736	0.00073046
chr17	79390455	79390455	C	T	snp	intronic	BAHCC1		rs560131157					2738	2	2736	0.00073046
chr19	58850490	58850490	G	A	snp	exonic	ZSCAN22	nonsynonymous SNV	rs757799019			0.0001	0.0001	2738	2	2735	0.000730727
chr19	18313401	18313401	G	A	snp	exonic	RAB3A	synonymous SNV	rs748905481			8.95E-06		2735	2	2733	0.000731261
chr21	42830713	42830713	G	A	snp	UTR3	MX1		rs777315672			0		2734	2	2732	0.000731529
chr9	90584220	90584220	C	T	snp	exonic	CDK20	nonsynonymous SNV	rs764319061			0		4102	3	4098	0.000731529
chr1	152325912	152325912	G	A	snp	exonic	FLG2	synonymous SNV	rs746195033			8.96E-06	7.17E-05	2733	2	2731	0.000731797
chr2	241661244	241661244	C	T	snp	exonic	KIF1A	nonsynonymous SNV	rs779019920			9.08E-06		2729	2	2726	0.000733138
chr1	144994715	144994715	C	T	snp	exonic	PDE4DIP	nonsynonymous SNV	rs781917759			8.95E-06	6.66E-05	4092	3	4089	0.000733138
chr16	70190676	70190676	C	T	snp	exonic	PDPR	nonsynonymous SNV	rs201167369			0.0006	0.0005	2727	2	2725	0.000733407
chr1	247587996	247587996	C	T	snp	exonic	NLRP3	synonymous SNV	rs139852370	Likely benign|Likely benign|Likely benign	Chronic_infantile_neurological\x2c_cutaneous_and_articular_syndrome|Familial_cold_autoinflammatory_syndrome|Familial_amyloid_nephropathy_with_urticaria_AND_deafness	0	0	2726	2	2724	0.000733676
chr10	99640102	99640102	G	A	snp	exonic	CRTAC1	nonsynonymous SNV	rs773010392			0		2726	2	2724	0.000733676
chr19	9070689	9070689	G	T	snp	exonic	MUC16	nonsynonymous SNV	rs772214765			8.98E-06		2725	2	2723	0.000733945
chr1	37947336	37947336	G	A	snp	exonic	ZC3H12A	nonsynonymous SNV	rs16824179			0.0005	0.0004	2724	2	2722	0.000734214
chr7	75617375	75617375	G	A	snp	intronic	TMEM120A		rs533180181			0		2724	2	2722	0.000734214
chr10	99640110	99640110	C	T	snp	exonic	CRTAC1	nonsynonymous SNV	rs144857552			0.0001	6.67E-05	2723	2	2721	0.000734484
chr11	46408056	46408056	G	T	snp	exonic	CHRM4	nonsynonymous SNV	rs769364189			0		2722	2	2720	0.000734754
chr3	52522309	52522309	A	G	snp	exonic	NISCH	nonsynonymous SNV	rs755540003			0		2722	2	2719	0.000735024
chr18	44260380	44260380	C	T	snp	exonic	ST8SIA5	synonymous SNV	rs758983022			0		2721	2	2718	0.000735294
chr4	124323274	124323274	G	A	snp	exonic	SPRY1	synonymous SNV	rs765840958			0		2719	2	2717	0.000735565
chr1	152325465	152325465	G	A	snp	exonic	FLG2	synonymous SNV	rs747254831			2.69E-05	0	2717	2	2715	0.000736106
chr19	7704726	7704726	G	A	snp	intronic	STXBP2		rs188150465			0.0011	0.0033	2714	2	2712	0.00073692
chr5	488421	488421	C	T	snp	intronic	SLC9A3		rs375264691			9.24E-05	6.68E-05	2714	2	2712	0.00073692
chr19	18546719	18546719	C	T	snp	exonic	ISYNA1	nonsynonymous SNV	rs769634970			0		2714	2	2712	0.00073692
chr11	67400499	67400499	G	A	snp	exonic	TBX10	nonsynonymous SNV	rs150805271			1.79E-05	0	2713	2	2711	0.000737191
chr15	41192230	41192230	T	C	snp	exonic	VPS18	nonsynonymous SNV	rs558732902			0		2714	2	2711	0.000737191
chr11	67400498	67400498	C	T	snp	exonic	TBX10	nonsynonymous SNV	rs780037338			8.95E-06		2710	2	2708	0.000738007
chr1	169797061	169797061	T	C	snp	intronic	C1orf112		rs533495028					2707	2	2705	0.000738825
chr1	144013959	144013959	G	A	snp	intergenic	FAM72C;NBPF20		rs781920400			0		2704	2	2702	0.000739645
chr1	249142526	249142526	G	A	snp	exonic	ZNF672	synonymous SNV	rs143940335			0	0	2700	2	2698	0.000740741
chr1	144931549	144931549	A	G	snp	exonic	PDE4DIP	nonsynonymous SNV	rs368899268			0	0	2699	2	2697	0.000741015
chr1	33354656	33354656	G	A	snp	exonic	HPCA	nonsynonymous SNV	rs781119977			1.79E-05		2699	2	2697	0.000741015
chr5	140307377	140307377	T	C	snp	exonic	PCDHAC1	synonymous SNV	rs12522306			9.85E-05	6.67E-05	2698	2	2696	0.00074129
chr6	144508287	144508287	G	A	snp	exonic	STX11	nonsynonymous SNV	rs867882515					4046	3	4043	0.000741473
chr3	42448395	42448395	G	A	snp	exonic	LYZL4	nonsynonymous SNV	rs778205543			1.79E-05	0	2697	2	2695	0.000741565
chr19	9070680	9070680	A	G	snp	exonic	MUC16	nonsynonymous SNV	rs771126872			8.98E-06		2696	2	2694	0.00074184
chr1	36553338	36553338	G	A	snp	exonic	TEKT2	nonsynonymous SNV	rs140017129			3.60E-05	0	2695	2	2693	0.000742115
chr19	10943762	10943762	G	A	snp	exonic	TMED1	nonsynonymous SNV	rs78225274			3.58E-05	0	2695	2	2693	0.000742115
chr22	38061757	38061757	C	T	snp	exonic	PDXP	nonsynonymous SNV	rs750098785			2.69E-05	6.67E-05	2693	2	2691	0.000742666
chr1	152281757	152281757	G	A	snp	exonic	FLG	nonsynonymous SNV	rs373471085			5.37E-05		2686	2	2683	0.000744879
chr20	62421723	62421723	C	T	snp	exonic	ZBTB46	nonsynonymous SNV	rs749625388			9.01E-06		2683	2	2681	0.000745434
chr22	38061733	38061733	G	A	snp	exonic	PDXP	nonsynonymous SNV	rs758065277			2.69E-05		2680	2	2678	0.000746269
chr3	52522275	52522275	G	A	snp	exonic	NISCH	nonsynonymous SNV	rs775596041			8.96E-06	0.0001	2680	2	2678	0.000746269
chr3	138739059	138739059	C	A	snp	exonic	PRR23B	nonsynonymous SNV	rs766249844			0		2677	2	2675	0.000747105
chr1	150131075	150131075	C	A	snp	exonic	PLEKHO1	nonsynonymous SNV	rs781937630					2673	2	2671	0.000748223
chr14	78709783	78709783	G	A	snp	exonic	NRXN3	nonsynonymous SNV	rs760018506			0		2671	2	2669	0.000748783
chr11	46408058	46408058	C	T	snp	exonic	CHRM4	nonsynonymous SNV	rs754403612			8.96E-06		2668	2	2666	0.000749625
chr16	68021556	68021556	A	G	snp	exonic	DPEP2	synonymous SNV	rs759244487			8.95E-06		2667	2	2665	0.000749906
chr5	1278804	1278804	C	T	snp	exonic	TERT	synonymous SNV	rs781604343					2667	2	2665	0.000749906
chr9	73151090	73151090	C	T	snp	exonic	TRPM3	nonsynonymous SNV	rs758342916			8.96E-06		2666	2	2664	0.000750188
chr1	27333125	27333125	G	A	snp	exonic	FAM46B	synonymous SNV	rs143879440			0	0	2665	2	2663	0.000750469
chr1	152193334	152193334	G	A	snp	exonic	HRNR	synonymous SNV	rs112655010			9.85E-05	0	2664	2	2662	0.000750751
chr18	8825046	8825046	C	T	snp	exonic	MTCL1	nonsynonymous SNV	rs145244362			4.58E-05	0	2664	2	2662	0.000750751
chr19	10939861	10939861	C	T	snp	exonic	DNM2	synonymous SNV	rs755163979			1.79E-05		2664	2	2661	0.000751033
chr9	73151058	73151058	C	T	snp	exonic	TRPM3	synonymous SNV	rs146678870			3.59E-05	6.67E-05	2658	2	2656	0.000752445
chr12	40876538	40876538	C	G	snp	exonic	MUC19	unknown	rs371605437					2658	2	2656	0.000752445
chr9	140772611	140772611	T	G	snp	exonic	CACNA1B	nonsynonymous SNV	rs768366699			9.04E-06		2657	2	2655	0.000752729
chr1	152323773	152323773	T	C	snp	exonic	FLG2	synonymous SNV	rs774029898			8.96E-06		2657	2	2655	0.000752729
chr1	152325229	152325229	C	T	snp	exonic	FLG2	nonsynonymous SNV	rs774534850			0		2654	2	2652	0.00075358
chr19	7964151	7964151	C	T	snp	exonic	LRRC8E	synonymous SNV	rs572952810			8.96E-06		2653	2	2651	0.000753864
chr8	145998713	145998713	G	A	snp	exonic	ZNF34	nonsynonymous SNV	rs753497153			0		2652	2	2650	0.000754148
chr14	34269090	34269090	G	A	snp	exonic	NPAS3	nonsynonymous SNV	rs779310871			8.98E-06		2653	2	2650	0.000754148
chr1	152325241	152325241	T	G	snp	exonic	FLG2	nonsynonymous SNV	rs151207521			0.0029	0.0023	2651	2	2649	0.000754432
chr22	38061758	38061758	G	A	snp	exonic	PDXP	synonymous SNV	rs368413888			7.17E-05		2649	2	2647	0.000755002
chr5	1278807	1278807	G	A	snp	exonic	TERT	synonymous SNV	rs777869512			8.95E-06	0	2649	2	2647	0.000755002
chr9	133355236	133355236	C	T	snp	intronic	ASS1		rs763389916	Pathogenic	Citrullinemia_type_I	1.80E-05	0	2648	2	2646	0.000755287
chr17	40849735	40849735	A	G	snp	exonic	CNTNAP1	synonymous SNV	rs752837852			2.69E-05		2645	2	2643	0.000756144
chr16	29994970	29994970	C	T	snp	exonic	TAOK2	synonymous SNV	rs761169768			8.07E-05	0.0003	2644	2	2642	0.00075643
chr1	154316720	154316720	A	G	snp	exonic	ATP8B2	synonymous SNV	rs557337837			0		2643	2	2641	0.000756716
chr20	36022684	36022684	C	T	snp	intronic	SRC		rs769407313			4.48E-05	0	2638	2	2636	0.00075815
chr1	107599581	107599581	C	T	snp	exonic	PRMT6	stopgain	rs372248663					2638	2	2635	0.000758438
chr21	10862577	10862577	C	A	snp	intergenic	TEKT4P2;TPTE		rs758289782			9.16E-06	0	2635	2	2633	0.000759013
chr3	195512434	195512434	G	T	snp	exonic	MUC4	nonsynonymous SNV	rs762433276			3.34E-05		2635	2	2633	0.000759013
chr9	140953117	140953117	G	C	snp	exonic	CACNA1B	nonsynonymous SNV	rs202036977					2634	2	2632	0.000759301
chr3	49168377	49168377	C	T	snp	intronic	LAMB2		rs2071677			0		2630	2	2628	0.000760456
chr19	7704739	7704739	C	T	snp	intronic	STXBP2		rs777253182			0		2627	2	2625	0.000761325
chr1	160106525	160106525	C	T	snp	intronic	ATP1A2		rs779538425			0		2627	2	2625	0.000761325
chr17	75878303	75878303	G	A	snp	ncRNA_exonic	LINC01973		rs373790757			3.64E-05	6.67E-05	2625	2	2623	0.000761905
chr7	64313208	64313208	G	A	snp	intergenic	ZNF138;ZNF273		rs111546448					2624	2	2622	0.000762195
chr19	50303314	50303314	C	T	snp	exonic	AP2A1	synonymous SNV	rs184250533			9.85E-05	0.0002	2624	2	2622	0.000762195
chr18	59221638	59221638	G	A	snp	exonic	CDH20	nonsynonymous SNV	rs777777577			9.06E-06		2619	2	2617	0.00076365
chr19	10939849	10939849	G	A	snp	exonic	DNM2	synonymous SNV	rs778166280			2.69E-05	0.0001	2619	2	2617	0.00076365
chr6	167753874	167753874	C	T	snp	exonic	TTLL2	synonymous SNV	rs371348357			8.95E-06		2615	2	2613	0.000764818
chr22	38084921	38084921	C	T	snp	exonic	NOL12	synonymous SNV	rs780156347			8.95E-06		2612	2	2610	0.000765697
chr17	39919433	39919433	G	A	snp	exonic	JUP	synonymous SNV	rs376345105			8.95E-06	0	2611	2	2609	0.00076599
chr14	105518036	105518036	G	A	snp	exonic	GPR132	synonymous SNV	rs780142285			1.79E-05		2611	2	2609	0.00076599
chr19	7704692	7704692	A	G	snp	exonic	STXBP2	nonsynonymous SNV	rs746119396			0		2609	2	2607	0.000766577
chr17	650836	650836	G	A	snp	exonic	GEMIN4	synonymous SNV	rs140610672			1.79E-05		2609	2	2606	0.000766871
chr14	105518045	105518045	G	A	snp	exonic	GPR132	synonymous SNV	rs768590591			8.96E-06		2607	2	2605	0.000767165
chr19	1105285	1105285	C	T	snp	intronic	GPX4		rs754288488			1.82E-05	6.67E-05	2607	2	2604	0.00076746
chr19	34263719	34263719	C	T	snp	exonic	CHST8	synonymous SNV	rs368191724			0	0	2605	2	2603	0.000767754
chr5	140307333	140307333	G	A	snp	exonic	PCDHAC1	nonsynonymous SNV	rs782605586			0		2605	2	2603	0.000767754
chr18	12274200	12274200	G	A	snp	exonic	CIDEA	nonsynonymous SNV	rs115661000			0.0011	0.0007	2604	2	2602	0.000768049
chr4	119951725	119951725	C	T	snp	exonic	SYNPO2	nonsynonymous SNV	rs201135790			0	0	2603	2	2601	0.000768344
chr5	1278822	1278822	G	A	snp	exonic	TERT	synonymous SNV	rs769553764			4.48E-05		2601	2	2599	0.000768935
chr1	176564490	176564490	G	A	snp	exonic	PAPPA2	nonsynonymous SNV	rs191775270			8.95E-06	0	2599	2	2597	0.000769527
chr13	24797717	24797717	C	T	snp	exonic	SPATA13	nonsynonymous SNV	rs868569099			5.25E-05		2598	2	2596	0.000769823
chr17	21319420	21319420	G	T	snp	exonic	KCNJ12;KCNJ18	nonsynonymous SNV	rs529503169			0	0	3898	3	3894	0.000769823
chr14	105518033	105518033	C	A	snp	exonic	GPR132	synonymous SNV	rs745430968			4.48E-05		2597	2	2595	0.000770119
chr17	19284614	19284614	C	A	snp	exonic	MAPK7	nonsynonymous SNV	rs753742102			0		2597	2	2595	0.000770119
chr14	78709795	78709795	G	A	snp	exonic	NRXN3	nonsynonymous SNV	rs767251599			2.34E-05		2597	2	2595	0.000770119
chr20	62421686	62421686	G	A	snp	exonic	ZBTB46	nonsynonymous SNV	rs377387987			1.80E-05		2595	2	2593	0.000770713
chr19	58850459	58850459	C	T	snp	exonic	ZSCAN22	stopgain	rs770878575			1.79E-05	6.67E-05	2594	2	2592	0.00077101
chr17	62020238	62020238	G	T	snp	exonic	SCN4A	nonsynonymous SNV	rs747252041			2.69E-05	6.67E-05	2591	2	2589	0.000771903
chr1	214638094	214638094	T	C	snp	exonic	PTPN14	nonsynonymous SNV	rs755550653			8.95E-06		2590	2	2588	0.000772201
chr3	49168259	49168259	C	T	snp	exonic	LAMB2	nonsynonymous SNV	rs144771072			2.69E-05		2587	2	2585	0.000773096
chr9	140777242	140777242	G	A	snp	exonic	CACNA1B	nonsynonymous SNV	rs200670479			0		2584	2	2582	0.000773994
chr3	49051483	49051483	G	A	snp	exonic	WDR6	nonsynonymous SNV	rs370967215			1.79E-05	0	2584	2	2582	0.000773994
chr1	152193163	152193163	G	A	snp	exonic	HRNR	synonymous SNV	rs566382287			0		2584	2	2582	0.000773994
chr8	88885840	88885840	G	C	snp	exonic	DCAF4L2	synonymous SNV	rs756000206			8.96E-06		2582	2	2580	0.000774593
chr14	65381185	65381185	G	A	snp	exonic	CHURC1;CHURC1-FNTB	stopgain	rs777281072			8.95E-06		2580	2	2578	0.000775194
chr3	138763141	138763141	C	T	snp	exonic	PRR23C	nonsynonymous SNV	rs770756308			9.26E-06		2579	2	2577	0.000775494
chr19	50303304	50303304	G	A	snp	exonic	AP2A1	nonsynonymous SNV	rs753456849					2578	2	2576	0.000775795
chr8	88885826	88885826	C	T	snp	exonic	DCAF4L2	nonsynonymous SNV	rs766449459			0		2577	2	2575	0.000776096
chr1	154316717	154316717	C	T	snp	exonic	ATP8B2	synonymous SNV	rs148099162			0	0	2575	2	2573	0.000776699
chr4	53410	53410	G	A	snp	intronic	ZNF595;ZNF718		rs758334794			0	0	2575	2	2573	0.000776699
chr17	19284629	19284629	C	T	snp	exonic	MAPK7	synonymous SNV	rs375097687			0	0	2572	2	2570	0.000777605
chr12	49221657	49221657	G	A	snp	exonic	CACNB3	nonsynonymous SNV	rs769337009			1.80E-05		2571	2	2569	0.000777907
chr17	19284649	19284649	G	A	snp	exonic	MAPK7	nonsynonymous SNV	rs772884779			0		2566	2	2564	0.000779423
chr19	10943721	10943721	C	A	snp	exonic	TMED1	nonsynonymous SNV	rs745902415			0		2564	2	2562	0.000780031
chr22	38209564	38209564	G	A	snp	exonic	GCAT	nonsynonymous SNV	rs758537417			1.81E-05	6.68E-05	2564	2	2562	0.000780031
chr8	144940703	144940703	T	G	snp	exonic	EPPK1	nonsynonymous SNV	rs782279978			0		2563	2	2561	0.000780336
chr12	40884623	40884623	A	G	snp	exonic	MUC19	unknown	rs12824881					2562	2	2560	0.00078064
chr22	21800873	21800873	C	T	snp	exonic	HIC2	synonymous SNV	rs779665007			1.79E-05	6.67E-05	2562	2	2560	0.00078064
chr19	9071361	9071361	G	A	snp	exonic	MUC16	nonsynonymous SNV	rs763488180			8.96E-06		2560	2	2558	0.00078125
chr4	53361	53361	C	A	snp	UTR5	ZNF595;ZNF718		rs761355847			0	0	3839	3	3836	0.000781454
chr15	25328848	25328848	-	AG	ins	ncRNA_intronic	SNHG14		rs745508240			0		2562	2	2557	0.000781555
chr19	11492709	11492709	C	T	snp	exonic	EPOR	synonymous SNV	rs375735369			8.98E-06		2558	2	2556	0.000781861
chr19	15514427	15514427	G	A	snp	exonic	AKAP8L	nonsynonymous SNV	rs754194153			0		2558	2	2556	0.000781861
chr11	3848819	3848819	G	A	snp	exonic	RHOG	nonsynonymous SNV	rs779140010			1.81E-05		2557	2	2555	0.000782167
chr15	79748919	79748919	A	T	snp	exonic	KIAA1024	nonsynonymous SNV	rs560398605			0		2556	2	2554	0.000782473
chr20	62421672	62421672	C	T	snp	exonic	ZBTB46	nonsynonymous SNV	rs773907493			8.12E-05		2551	2	2549	0.000784006
chr22	45970469	45970469	C	T	snp	exonic	FBLN1	synonymous SNV	rs774273948			8.96E-06		2550	2	2548	0.000784314
chr1	152191916	152191916	C	T	snp	exonic	HRNR	nonsynonymous SNV	rs199798618			2.69E-05		2549	2	2547	0.000784621
chr6	144508111	144508111	C	T	snp	exonic	STX11	nonsynonymous SNV	rs777103066			0		2547	2	2545	0.000785238
chr6	170627696	170627696	C	T	snp	exonic	FAM120B	synonymous SNV	rs752794909			0		2546	2	2544	0.000785546
chr19	9071192	9071192	A	G	snp	exonic	MUC16	synonymous SNV	rs764219925			0		2547	2	2544	0.000785546
chr3	49168398	49168398	G	A	snp	exonic	LAMB2	synonymous SNV	rs776149180			2.69E-05		2543	2	2541	0.000786473
chr2	219029408	219029408	T	C	snp	exonic	CXCR1	nonsynonymous SNV	rs778537946			8.97E-06	6.66E-05	2541	2	2539	0.000787092
chr6	170627653	170627653	G	A	snp	exonic	FAM120B	nonsynonymous SNV	rs555388194			0	0	2539	2	2537	0.000787712
chr14	24709892	24709892	C	T	snp	exonic	TINF2	nonsynonymous SNV	rs750385069			8.98E-06		2539	2	2537	0.000787712
chrX	70823702	70823702	A	G	snp	exonic	GCNA	nonsynonymous SNV	rs752860496			2.50E-05	0	2537	2	2535	0.000788333
chr19	1105236	1105236	G	A	snp	exonic	GPX4	unknown	rs566974741					2536	2	2534	0.000788644
chr11	47603775	47603775	C	T	snp	intronic	NDUFS3		rs368557574			2.69E-05	6.67E-05	2533	2	2531	0.000789578
chr9	138662301	138662301	C	T	snp	intronic	KCNT1		rs371287985	Likely benign	not_specified	0.0001	0.0002	2533	2	2531	0.000789578
chr11	118984955	118984955	G	A	snp	exonic	C2CD2L	nonsynonymous SNV	rs766902256			0		2533	2	2531	0.000789578
chr7	143092422	143092422	G	A	snp	exonic	EPHA1	synonymous SNV	rs544450689			8.95E-05	0.0001	2531	2	2529	0.000790202
chr19	7964235	7964235	T	C	snp	exonic	LRRC8E	synonymous SNV	rs191792215			0	0	2529	2	2527	0.000790826
chr22	38823786	38823786	C	T	snp	exonic	KCNJ4	nonsynonymous SNV	rs753406385			9.07E-06		2529	2	2527	0.000790826
chr10	73826760	73826760	G	A	snp	exonic	SPOCK2	synonymous SNV	rs765154598			8.95E-06		2528	2	2526	0.000791139
chr16	67265542	67265542	G	A	snp	exonic	FHOD1	nonsynonymous SNV	rs772102709			0		2529	2	2526	0.000791139
chr5	1278776	1278776	G	A	snp	exonic	TERT	nonsynonymous SNV	rs754018580			8.96E-06		2527	2	2525	0.000791452
chr19	6714367	6714367	C	T	snp	exonic	C3	nonsynonymous SNV	rs147549358			8.95E-06		2526	2	2524	0.000791766
chr17	62022845	62022845	C	T	snp	exonic	SCN4A	nonsynonymous SNV	rs780268341			1.79E-05		2526	2	2524	0.000791766
chr14	105517984	105517984	C	T	snp	exonic	GPR132	nonsynonymous SNV	rs768588303			2.70E-05	0	2525	2	2523	0.000792079
chr14	106725315	106725315	G	A	snp	intergenic	ADAM6;LINC00226		rs12436003			0.0004	0.0005	2524	2	2522	0.000792393
chr19	7964132	7964132	G	A	snp	exonic	LRRC8E	nonsynonymous SNV	rs146121701			7.17E-05	6.67E-05	2523	2	2521	0.000792707
chr16	68021498	68021498	C	T	snp	exonic	DPEP2	nonsynonymous SNV	rs148784169					2524	2	2521	0.000792707
chr19	42873045	42873045	C	A	snp	exonic	MEGF8	nonsynonymous SNV	rs758007636			1.79E-05		2522	2	2520	0.000793021
chr19	10943713	10943713	C	T	snp	exonic	TMED1	synonymous SNV	rs771324875			3.59E-05	0.0001	2522	2	2520	0.000793021
chr19	9272111	9272111	C	T	snp	UTR3	ZNF317		rs372294186			4.61E-05	0.0002	2520	2	2518	0.000793651
chr1	176564472	176564472	C	T	snp	exonic	PAPPA2	stopgain	rs375941290			0		2520	2	2518	0.000793651
chr16	1813677	1813677	C	A	snp	exonic	MAPK8IP3	nonsynonymous SNV	rs866906730					2520	2	2518	0.000793651
chr17	74732454	74732454	C	T	snp	exonic	SRSF2	nonsynonymous SNV	rs753364028					2521	2	2518	0.000793651
chr17	7369167	7369167	G	A	snp	exonic	ZBTB4	synonymous SNV	rs549301753			2.69E-05		2518	2	2516	0.000794281
chr22	50280118	50280118	G	A	snp	exonic	ZBED4	synonymous SNV	rs143483335			0	0	2512	2	2510	0.000796178
chr17	74288710	74288710	C	A	snp	exonic	QRICH2	nonsynonymous SNV	rs868452174					2512	2	2510	0.000796178
chr1	77510040	77510040	G	A	snp	exonic	ST6GALNAC5	nonsynonymous SNV	rs764946134			4.49E-05		2512	2	2509	0.000796495
chr16	30750431	30750431	G	A	snp	exonic	SRCAP	nonsynonymous SNV	rs755074363			8.96E-06	0	2510	2	2508	0.000796813
chr8	38775527	38775527	G	A	snp	exonic	PLEKHA2	nonsynonymous SNV	rs766515028			1.79E-05	6.69E-05	2510	2	2508	0.000796813
chr7	143092421	143092421	C	T	snp	exonic	EPHA1	nonsynonymous SNV	rs758249861			0		2507	2	2505	0.000797766
chr19	4511563	4511563	C	G	snp	exonic	PLIN4	synonymous SNV	rs758314061			0	0	2505	2	2503	0.000798403
chr14	106725312	106725312	T	C	snp	intergenic	ADAM6;LINC00226		rs781913785			9.16E-06		2504	2	2502	0.000798722
chr3	195513136	195513136	G	C	snp	exonic	MUC4	nonsynonymous SNV	rs140116971			4.46E-05	0.0007	2504	2	2501	0.000799041
chr14	34269044	34269044	A	G	snp	exonic	NPAS3	nonsynonymous SNV	rs761489524			0		2502	2	2500	0.000799361
chr9	86590391	86590391	G	A	snp	exonic	HNRNPK	synonymous SNV	rs201251896					2501	2	2499	0.00079968
chr19	9272114	9272114	G	A	snp	UTR3	ZNF317		rs780526352			0		2501	2	2499	0.00079968
chr17	51901163	51901163	C	T	snp	exonic	KIF2B	nonsynonymous SNV	rs76337756			0.0002	0.0006	2500	2	2498	0.0008
chr1	152193269	152193269	G	A	snp	exonic	HRNR	nonsynonymous SNV	rs774577481			8.95E-06	0	2500	2	2498	0.0008
chr12	40879690	40879690	C	T	snp	exonic	MUC19	unknown	rs369642334					2499	2	2497	0.00080032
chr9	90584035	90584035	G	T	snp	intronic	CDK20		rs574320515				0	2499	2	2497	0.00080032
chr6	26468403	26468403	A	G	snp	exonic	BTN2A1	nonsynonymous SNV	rs772503404			8.96E-06		2498	2	2496	0.000800641
chr16	70190575	70190575	C	T	snp	exonic	PDPR	synonymous SNV	rs201282007			0	0	3746	3	3743	0.000800854
chr19	15514392	15514392	C	T	snp	exonic	AKAP8L	nonsynonymous SNV	rs560801139			1.79E-05		2496	2	2494	0.000801282
chr1	155014223	155014223	G	A	snp	exonic	DCST1	nonsynonymous SNV	rs202181498			0	0	2493	2	2491	0.000802246
chr14	65381184	65381184	T	C	snp	exonic	CHURC1;CHURC1-FNTB	nonsynonymous SNV	rs755736818			8.95E-06		2492	2	2490	0.000802568
chr1	150131155	150131155	C	T	snp	exonic	PLEKHO1	nonsynonymous SNV	rs199760053			0		2491	2	2489	0.00080289
chr1	214638125	214638125	G	A	snp	exonic	PTPN14	nonsynonymous SNV	rs529225480			0	0	2489	2	2487	0.000803536
chr19	9071576	9071576	G	T	snp	exonic	MUC16	synonymous SNV	rs769096276			0	0	2489	2	2487	0.000803536
chr14	105517966	105517966	C	T	snp	exonic	GPR132	nonsynonymous SNV	rs754386954			1.80E-05		2488	2	2486	0.000803859
chr22	38061686	38061686	G	A	snp	exonic	PDXP	synonymous SNV	rs773408710			8.96E-06	6.68E-05	2488	2	2486	0.000803859
chr1	27277975	27277975	G	A	snp	exonic	KDF1	synonymous SNV	rs142079202			0.0001	0	2487	2	2485	0.000804182
chr19	54969597	54969597	C	T	snp	exonic	LENG8	nonsynonymous SNV	rs141640196			8.95E-06		2486	2	2484	0.000804505
chr1	152193455	152193455	C	T	snp	exonic	HRNR	nonsynonymous SNV	rs147217750			0.0001	0.0001	2486	2	2484	0.000804505
chr9	116811508	116811508	G	A	snp	exonic	ZNF618	synonymous SNV	rs201846984			0	0	2485	2	2483	0.000804829
chr12	51518838	51518838	G	A	snp	intronic	TFCP2		rs563798181			0		2485	2	2483	0.000804829
chr11	47603704	47603704	A	G	snp	exonic	NDUFS3	nonsynonymous SNV	rs770110842			1.79E-05		2482	2	2480	0.000805802
chr1	150131042	150131042	T	C	snp	exonic	PLEKHO1	nonsynonymous SNV	rs782675147			0		2482	2	2480	0.000805802
chr8	104427447	104427447	G	C	snp	exonic	DCAF13	nonsynonymous SNV	rs760383267			9.02E-06		2482	2	2479	0.000806127
chr14	101200685	101200685	G	A	snp	exonic	DLK1	nonsynonymous SNV	rs768199458			0		2480	2	2478	0.000806452
chr14	106725337	106725337	C	T	snp	intergenic	ADAM6;LINC00226		rs782590771			3.67E-05	0	2481	2	2478	0.000806452
chr12	8234890	8234890	G	T	snp	exonic	NECAP1	synonymous SNV	rs765219141			0		2480	2	2477	0.000806777
chr16	837646	837646	C	T	snp	exonic;splicing	RPUSD1;RPUSD1	nonsynonymous SNV	rs747818943			0		2478	2	2476	0.000807103
chr22	38061815	38061815	C	T	snp	exonic	PDXP	synonymous SNV	rs761769123			4.49E-05	0	2478	2	2476	0.000807103
chr19	15514459	15514459	C	T	snp	exonic	AKAP8L	nonsynonymous SNV	rs746700503			9.04E-06		2479	2	2476	0.000807103
chr11	500687	500687	G	A	snp	intronic	RNH1		rs866561718			0		2475	2	2473	0.000808081
chr20	18123431	18123431	G	A	snp	exonic	KAT14	nonsynonymous SNV	rs201768810			9.15E-06		2474	2	2472	0.000808407
chr1	1957100	1957100	G	A	snp	exonic	GABRD	synonymous SNV	rs755920072			8.98E-06		2473	2	2471	0.000808734
chr16	88783580	88783580	C	T	snp	exonic	PIEZO1	nonsynonymous SNV	rs370296725	Pathogenic	Lymphedema\x2c_hereditary\x2c_III	0		2474	2	2471	0.000808734
chr16	88783412	88783412	C	T	snp	intronic	PIEZO1		rs746939129			0.0002	0.0001	2470	2	2468	0.000809717
chr1	152324149	152324149	C	A	snp	exonic	FLG2	nonsynonymous SNV	rs765378483			3.59E-05	0.0003	2470	2	2468	0.000809717
chr1	152323970	152323970	C	T	snp	exonic	FLG2	nonsynonymous SNV	rs746746889			0	0.0005	2469	2	2467	0.000810045
chr9	140777204	140777204	G	A	snp	exonic	CACNA1B	synonymous SNV	rs772906173			8.95E-06	0.0001	2469	2	2467	0.000810045
chr3	48694641	48694641	C	T	snp	exonic	CELSR3	nonsynonymous SNV	rs368046904					2468	2	2466	0.000810373
chr16	29994976	29994976	C	T	snp	exonic	TAOK2	synonymous SNV	rs61737875			4.49E-05	6.67E-05	2468	2	2466	0.000810373
chr3	194081504	194081504	G	A	snp	exonic	LRRC15	nonsynonymous SNV	rs544084516			0	0	2466	2	2464	0.00081103
chr17	19284591	19284591	C	T	snp	exonic	MAPK7	nonsynonymous SNV	rs369699460					2465	2	2463	0.000811359
chr5	145895247	145895247	C	T	snp	exonic	GPR151	nonsynonymous SNV	rs375295268			1.79E-05		2464	2	2462	0.000811688
chr11	65655841	65655841	C	A	snp	exonic	FIBP	stopgain	rs866801760					2464	2	2462	0.000811688
chr3	122003711	122003711	C	T	snp	exonic	CASR	synonymous SNV	rs200686461			0		2462	2	2460	0.000812348
chr19	56369443	56369443	C	T	snp	exonic	NLRP4	synonymous SNV	rs771993722			1.79E-05	0	2462	2	2460	0.000812348
chr13	58208444	58208444	G	A	snp	exonic	PCDH17	synonymous SNV	rs116693596			0.0001	0.0002	2463	2	2460	0.000812348
chr16	16259598	16259598	A	C	snp	exonic	ABCC6	nonsynonymous SNV	rs72657695			1.79E-05		2461	2	2459	0.000812678
chr5	140683205	140683205	G	A	snp	exonic	SLC25A2	synonymous SNV	rs782238292			1.79E-05		2462	2	2459	0.000812678
chr1	152283519	152283519	G	A	snp	exonic	FLG	synonymous SNV	rs545397624			1.79E-05		2459	2	2457	0.000813339
chr2	219029340	219029340	G	A	snp	exonic	CXCR1	nonsynonymous SNV	rs765591420			0	0.0001	2459	2	2457	0.000813339
chr19	2191249	2191249	G	A	snp	intronic	DOT1L		rs781027157			9.48E-06	0.0001	2460	2	2457	0.000813339
chr22	40757583	40757583	G	A	snp	exonic	ADSL	synonymous SNV	rs774891125			1.79E-05		2458	2	2456	0.00081367
chr19	10395122	10395122	A	G	snp	exonic	ICAM1	synonymous SNV	rs757771096			9.03E-06		2457	2	2455	0.000814001
chr8	99440523	99440523	G	A	snp	exonic	KCNS2	nonsynonymous SNV	rs373045610			1.79E-05		2456	2	2454	0.000814332
chr22	38061812	38061812	G	A	snp	exonic	PDXP	synonymous SNV	rs751502468			0		2452	2	2450	0.000815661
chr8	104427443	104427443	T	C	snp	exonic	DCAF13	synonymous SNV	rs759571077			9.02E-06		2452	2	2450	0.000815661
chr4	6303668	6303668	G	A	snp	exonic	WFS1	nonsynonymous SNV	rs28937893	Pathogenic|Likely pathogenic	WFS1-Related_Disorders|Diabetes_mellitus_AND_insipidus_with_optic_atrophy_AND_deafness	9.06E-06		2449	2	2447	0.00081666
chr11	121000571	121000571	C	T	snp	exonic	TECTA	synonymous SNV	rs377433816			4.48E-05		2450	2	2447	0.00081666
chr19	4511400	4511400	C	A	snp	exonic	PLIN4	nonsynonymous SNV	rs200538852			2.73E-05	0	2448	2	2446	0.000816993
chr19	49573674	49573674	G	A	snp	exonic	KCNA7	synonymous SNV	rs775117076			0		2447	2	2445	0.000817327
chr21	42830659	42830659	C	T	snp	exonic	MX1	nonsynonymous SNV	rs867613553					2447	2	2445	0.000817327
chr3	52428657	52428657	C	T	snp	exonic	DNAH1	synonymous SNV	rs373290672			0.0004	0.0003	2446	2	2444	0.000817661
chr1	247588123	247588123	C	A	snp	exonic	NLRP3	nonsynonymous SNV	rs760653458			8.98E-06		2446	2	2444	0.000817661
chr7	1784547	1784547	G	A	snp	exonic	ELFN1	synonymous SNV	rs77210571			0.001	0.0009	2446	2	2444	0.000817661
chr19	2191112	2191112	C	T	snp	exonic	DOT1L	synonymous SNV	rs766429376			8.96E-06		2445	2	2443	0.000817996
chr1	94344737	94344737	C	T	snp	UTR5	DNTTIP2		rs754579041			1.82E-05		2443	2	2441	0.000818666
chrX	70823658	70823658	A	T	snp	exonic	GCNA	nonsynonymous SNV	rs748997155				0	2444	2	2441	0.000818666
chr19	49573677	49573677	C	T	snp	exonic	KCNA7	synonymous SNV	rs371776324				0	2442	2	2440	0.000819001
chr22	40757554	40757554	C	T	snp	exonic	ADSL	nonsynonymous SNV	rs376357524	Uncertain significance	not_specified	4.48E-05		2442	2	2440	0.000819001
chr19	9071258	9071258	G	A	snp	exonic	MUC16	synonymous SNV	rs200721151			1.79E-05		3663	3	3660	0.000819001
chr1	152327535	152327535	A	G	snp	exonic	FLG2	synonymous SNV	rs12754184			2.83E-05	0.0014	2441	2	2439	0.000819336
chr19	54969557	54969557	C	T	snp	exonic	LENG8	synonymous SNV	rs745637395			8.96E-06		2440	2	2438	0.000819672
chr6	170627619	170627619	T	A	snp	exonic	FAM120B	nonsynonymous SNV	rs201235090			0	0.0004	2439	2	2437	0.000820008
chr1	109794118	109794118	C	T	snp	exonic	CELSR2	nonsynonymous SNV	rs372637628			1.79E-05		2439	2	2437	0.000820008
chr9	138662293	138662293	A	G	snp	exonic	KCNT1	nonsynonymous SNV	rs756080429			0		2439	2	2437	0.000820008
chr3	194080270	194080270	G	A	snp	exonic	LRRC15	synonymous SNV	rs140913129			8.96E-06	0	2436	2	2434	0.000821018
chr22	20760556	20760556	C	T	snp	exonic	ZNF74	synonymous SNV	rs764914183			0		2436	2	2434	0.000821018
chr10	7621784	7621784	G	A	snp	exonic	ITIH5	nonsynonymous SNV	rs777190590			7.16E-05		2436	2	2434	0.000821018
chr3	195512143	195512143	G	A	snp	exonic	MUC4	nonsynonymous SNV	rs574704523			3.13E-05	0	2435	2	2433	0.000821355
chr16	31089107	31089107	C	T	snp	exonic	ZNF646	nonsynonymous SNV	rs767059751			0		2432	2	2430	0.000822368
chr12	132325257	132325257	G	A	snp	exonic	MMP17	nonsynonymous SNV	rs780582086			0	0	2430	2	2428	0.000823045
chr7	100549881	100549881	C	T	snp	exonic	MUC3A	synonymous SNV	rs777787055			3.81E-05	0	2431	2	2428	0.000823045
chr1	110050908	110050908	C	T	snp	exonic	AMIGO1	synonymous SNV	rs555169650			8.96E-06		2430	2	2427	0.000823384
chr1	152275882	152275882	C	T	snp	exonic	FLG	nonsynonymous SNV	rs746355769			0		2428	2	2426	0.000823723
chr19	54969554	54969554	C	T	snp	exonic	LENG8	synonymous SNV	rs749470547			0		2428	2	2426	0.000823723
chr15	79748931	79748931	C	T	snp	exonic	KIAA1024	nonsynonymous SNV	rs766917763			0	6.67E-05	2428	2	2426	0.000823723
chr9	137998580	137998580	C	T	snp	intronic	OLFM1		rs746521297			2.74E-05	6.67E-05	2427	2	2425	0.000824063
chr16	21531522	21531522	G	A	snp	ncRNA_exonic	SLC7A5P2		rs780888351			1.82E-05		2427	2	2425	0.000824063
chr14	34269007	34269007	C	T	snp	exonic	NPAS3	synonymous SNV	rs151099881			5.50E-05	6.67E-05	2426	2	2424	0.000824402
chr12	57559628	57559628	C	T	snp	exonic	LRP1	synonymous SNV	rs761500509			2.69E-05	0.0002	2426	2	2424	0.000824402
chr9	35399066	35399066	G	A	snp	intronic	UNC13B		rs770436201			9.02E-06		2426	2	2424	0.000824402
chr3	101540565	101540565	A	G	snp	exonic	NXPE3	nonsynonymous SNV	rs747915827			8.96E-06		2425	2	2423	0.000824742
chr4	37636526	37636526	C	T	snp	exonic	RELL1	synonymous SNV	rs201810967			8.95E-05		2424	2	2422	0.000825083
chr11	57564328	57564328	C	T	snp	exonic	CTNND1	nonsynonymous SNV	rs368249782			3.61E-05		2423	2	2420	0.000825764
chr19	4511995	4511995	G	A	snp	exonic	PLIN4	synonymous SNV	rs759029294			1.79E-05		2421	2	2419	0.000826105
chr9	140772573	140772573	C	T	snp	exonic	CACNA1B	nonsynonymous SNV	rs768150608			9.12E-06		2421	2	2419	0.000826105
chr21	46875758	46875758	A	T	snp	exonic	COL18A1	nonsynonymous SNV	rs529405045			0		2418	2	2416	0.00082713
chr19	14067012	14067012	C	T	snp	exonic	DCAF15	nonsynonymous SNV	rs750410542			0		2418	2	2416	0.00082713
chr9	34996633	34996633	C	T	snp	exonic	DNAJB5	nonsynonymous SNV	rs377313197			0		2417	2	2415	0.000827472
chr19	49573774	49573774	C	T	snp	exonic	KCNA7	nonsynonymous SNV	rs370046903			0		2418	2	2415	0.000827472
chr8	144940627	144940627	C	T	snp	exonic	EPPK1	synonymous SNV	rs61368455			9.07E-06	0	3625	3	3622	0.000827586
chr12	56604166	56604166	C	T	snp	exonic	RNF41	nonsynonymous SNV	rs142114673			0.0004	0.0004	2414	2	2412	0.0008285
chr19	1105318	1105318	T	C	snp	intronic	GPX4		rs770740384			0		2414	2	2412	0.0008285
chr12	132325245	132325245	G	A	snp	exonic	MMP17	nonsynonymous SNV	rs577709415			1.80E-05		2412	2	2410	0.000829187
chr9	21239937	21239937	G	A	snp	UTR5	IFNA14		rs775016079			0	0	2411	2	2409	0.000829531
chr6	76022197	76022197	G	A	snp	exonic	FILIP1	synonymous SNV	rs267601125					2410	2	2408	0.000829876
chr20	18296518	18296518	C	T	snp	exonic	ZNF133	synonymous SNV	rs375405758			1.79E-05	6.68E-05	2409	2	2407	0.00083022
chr1	152324209	152324209	C	G	snp	exonic	FLG2	nonsynonymous SNV	rs528776790			0	0.0011	2408	2	2406	0.000830565
chr17	41570992	41570992	T	A	snp	intronic	DHX8		rs375106079					2409	2	2406	0.000830565
chr4	20256587	20256587	C	T	snp	intronic	SLIT2		rs539444921					2406	2	2404	0.000831255
chr5	180338500	180338500	G	A	snp	exonic	BTNL8	nonsynonymous SNV	rs762544045			0		2404	2	2402	0.000831947
chr1	109795135	109795135	G	A	snp	exonic	CELSR2	nonsynonymous SNV	rs573729296			0	0	2403	2	2401	0.000832293
chr19	56369399	56369399	G	A	snp	exonic	NLRP4	nonsynonymous SNV	rs574342762			0	0	2403	2	2401	0.000832293
chr12	7188122	7188122	C	T	snp	exonic	C1R	unknown	rs755238983			0		2400	2	2398	0.000833333
chr20	62597661	62597661	C	T	snp	exonic	ZNF512B	synonymous SNV	rs747133747			1.79E-05		3601	3	3597	0.000833333
chr19	50303279	50303279	G	A	snp	exonic	AP2A1	nonsynonymous SNV	rs763624613			0		2398	2	2396	0.000834028
chr3	195511707	195511707	T	C	snp	exonic	MUC4	synonymous SNV	rs764345815			0	0	2397	2	2395	0.000834376
chr4	6303788	6303788	C	T	snp	exonic	WFS1	nonsynonymous SNV	rs138127684			0.0002	6.67E-05	2398	2	2395	0.000834376
chr9	34996632	34996632	G	A	snp	exonic	DNAJB5	synonymous SNV	rs776465856			8.98E-06		2395	2	2393	0.000835073
chr19	54969618	54969618	C	T	snp	exonic	LENG8	nonsynonymous SNV	rs778791903			0	0	2395	2	2393	0.000835073
chr19	49110285	49110285	C	T	snp	exonic	SPACA4	nonsynonymous SNV	rs143767613			7.21E-05	0	2394	2	2392	0.000835422
chr3	195512844	195512844	G	C	snp	exonic	MUC4	nonsynonymous SNV	rs201717451			0.0002	0.0007	2394	2	2392	0.000835422
chr19	7267546	7267546	G	A	snp	exonic	INSR	synonymous SNV	rs758233642			8.96E-06		2394	2	2392	0.000835422
chr1	888597	888597	G	A	snp	exonic	NOC2L	synonymous SNV	rs564925208			0		2393	2	2391	0.000835771
chr6	51890439	51890439	C	T	snp	exonic	PKHD1	nonsynonymous SNV	rs139063552	Uncertain significance|Uncertain significance	Autosomal_recessive_polycystic_kidney_disease|not_specified	6.27E-05	0	2392	2	2390	0.00083612
chr9	73151005	73151005	T	C	snp	exonic	TRPM3	nonsynonymous SNV	rs745777101			0		2392	2	2390	0.00083612
chr7	131853172	131853172	C	T	snp	exonic	PLXNA4	nonsynonymous SNV	rs757554246			4.49E-05	6.67E-05	2392	2	2390	0.00083612
chr19	17628610	17628610	G	A	snp	exonic	PGLS	nonsynonymous SNV	rs756046118			3.58E-05		2391	2	2389	0.00083647
chr9	34996660	34996660	G	A	snp	exonic	DNAJB5	nonsynonymous SNV	rs529019543			0		2390	2	2388	0.00083682
chr1	152283669	152283669	C	T	snp	exonic	FLG	synonymous SNV	rs199949996			8.06E-05	0.0002	2388	2	2386	0.000837521
chr10	7621753	7621753	C	T	snp	exonic	ITIH5	synonymous SNV	rs190567154			0.0002	0	2383	2	2381	0.000839278
chr1	153963248	153963248	G	A	snp	UTR5	RPS27		rs201083351			1.79E-05		2383	2	2381	0.000839278
chr9	21239942	21239942	C	A	snp	UTR5	IFNA14		rs750887963			8.97E-06		2383	2	2381	0.000839278
chr19	10939909	10939909	C	T	snp	exonic	DNM2	synonymous SNV	rs751020224			8.97E-06		2382	2	2380	0.000839631
chr18	44260420	44260420	T	C	snp	exonic	ST8SIA5	nonsynonymous SNV	rs769317796			0		2382	2	2380	0.000839631
chr3	48683019	48683019	C	A	snp	exonic	CELSR3	nonsynonymous SNV	rs773631624			2.72E-05	6.68E-05	2382	2	2380	0.000839631
chr19	49573704	49573704	G	A	snp	exonic	KCNA7	synonymous SNV	rs77918139			4.49E-05	0	2380	2	2378	0.000840336
chr9	130287376	130287376	C	T	snp	exonic	FAM129B	nonsynonymous SNV	rs146496636			2.69E-05		2378	2	2376	0.000841043
chr1	9416555	9416555	G	A	snp	exonic	SPSB1	nonsynonymous SNV	rs200251006			0		2378	2	2376	0.000841043
chr11	65827297	65827297	G	A	snp	exonic	SF3B2	synonymous SNV	rs377200128			2.69E-05		2378	2	2376	0.000841043
chr19	49573720	49573720	A	G	snp	exonic	KCNA7	nonsynonymous SNV	rs775241762			4.49E-05		2378	2	2376	0.000841043
chr11	6645096	6645096	C	T	snp	exonic	DCHS1	nonsynonymous SNV	rs763453802			8.10E-05	0.0001	2377	2	2375	0.000841397
chr1	144995006	144995006	T	C	snp	ncRNA_intronic	LOC100996724		rs781945648			0	0	2377	2	2375	0.000841397
chr19	10939813	10939813	C	T	snp	exonic	DNM2	synonymous SNV	rs117598326	Benign|Benign|Likely benign|Likely benign	DNM2-related_intermediate_Charcot-Marie-Tooth_neuropathy|not_specified|Centronuclear_Myopathy\x2c_Dominant|Charcot-Marie-Tooth\x2c_Intermediate	0.0007	0.0011	2376	2	2374	0.000841751
chr9	137998671	137998671	A	G	snp	exonic	OLFM1	synonymous SNV	rs777336394			0	0	2376	2	2374	0.000841751
chr3	49152720	49152720	C	T	snp	exonic	USP19	nonsynonymous SNV	rs756705771			0		2377	2	2374	0.000841751
chr12	57573164	57573164	C	T	snp	exonic	LRP1	synonymous SNV	rs750565760			0		2375	2	2373	0.000842105
chr19	42873172	42873172	G	A	snp	intronic	MEGF8		rs754254798			1.81E-05		2375	2	2373	0.000842105
chr7	64313268	64313268	G	A	snp	intergenic	ZNF138;ZNF273		rs764996621				6.67E-05	2375	2	2373	0.000842105
chr3	195512868	195512868	G	A	snp	exonic	MUC4	synonymous SNV	rs777839294			1.65E-05	6.92E-05	2375	2	2373	0.000842105
chr1	888684	888684	C	T	snp	intronic	NOC2L		rs368380119			7.39E-05	6.67E-05	2376	2	2373	0.000842105
chr16	22926448	22926448	C	T	snp	exonic	HS3ST2	synonymous SNV	rs532545545			8.95E-06	0	2376	2	2373	0.000842105
chr21	47545888	47545888	G	A	snp	exonic	COL6A2	nonsynonymous SNV	rs145140058	Uncertain significance	not_specified	5.38E-05		2374	2	2372	0.00084246
chr4	1210752	1210752	G	A	snp	ncRNA_exonic	CTBP1-AS		rs551126227				0	2374	2	2372	0.00084246
chr2	220421331	220421331	C	T	snp	exonic	OBSL1	nonsynonymous SNV	rs769302847	Uncertain significance	Three_M_syndrome	8.96E-06	6.67E-05	2374	2	2372	0.00084246
chr12	7309304	7309304	G	A	snp	intronic	CLSTN3		rs761580039			0		2373	2	2371	0.000842815
chr16	22926449	22926449	G	A	snp	exonic	HS3ST2	nonsynonymous SNV	rs533578919			2.69E-05	0	2371	2	2369	0.000843526
chr19	7964276	7964276	C	T	snp	exonic	LRRC8E	nonsynonymous SNV	rs781106170			3.58E-05	0	2371	2	2369	0.000843526
chr7	150069930	150069930	C	A	snp	exonic	REPIN1	nonsynonymous SNV	rs745317554					2370	2	2368	0.000843882
chr14	65381145	65381145	T	C	snp	exonic	CHURC1;CHURC1-FNTB	nonsynonymous SNV	rs776139597			8.95E-06		2370	2	2368	0.000843882
chr3	183225964	183225964	C	T	snp	exonic	KLHL6	synonymous SNV	rs776464906			1.79E-05	0	2369	2	2367	0.000844238
chr6	170627538	170627538	C	T	snp	exonic	FAM120B	nonsynonymous SNV	rs762327018			0		2367	2	2365	0.000844951
chr1	176564534	176564534	C	T	snp	exonic	PAPPA2	synonymous SNV	rs753875696			6.27E-05	6.67E-05	2368	2	2365	0.000844951
chr4	13601549	13601549	G	A	snp	exonic	BOD1L1	synonymous SNV	rs755637454			0		2366	2	2364	0.000845309
chr3	195510974	195510974	C	G	snp	exonic	MUC4	nonsynonymous SNV	rs561604107			1.72E-05	0	2365	2	2363	0.000845666
chr8	61655360	61655360	C	T	snp	exonic	CHD7	stopgain	rs727503861	Pathogenic|Pathogenic	not_provided|CHARGE_association			2363	2	2361	0.000846382
chr19	9063785	9063785	G	A	snp	exonic	MUC16	synonymous SNV	rs768793263			0		2362	2	2360	0.00084674
chr11	128781401	128781401	T	C	snp	exonic	KCNJ5	nonsynonymous SNV	rs868029427					2362	2	2360	0.00084674
chr16	31089096	31089096	G	A	snp	exonic	ZNF646	nonsynonymous SNV	rs560606898			0		2361	2	2359	0.000847099
chr1	17314897	17314897	C	T	snp	exonic	ATP13A2	synonymous SNV	rs767921922			8.95E-06		2361	2	2359	0.000847099
chr7	100676788	100676788	C	A	snp	exonic	MUC17	synonymous SNV	rs771049776			0		2361	2	2359	0.000847099
chr9	130551720	130551720	G	A	snp	exonic	CDK9	synonymous SNV	rs777066206			8.96E-06		2360	2	2358	0.000847458
chr8	135614927	135614927	G	T	snp	exonic	ZFAT	synonymous SNV	rs746717457			0		2361	2	2358	0.000847458
chr3	134885791	134885791	G	A	snp	exonic	EPHB1	nonsynonymous SNV	rs754596439			8.96E-06		4720	4	4716	0.000847458
chr9	34996537	34996537	C	T	snp	exonic	DNAJB5	nonsynonymous SNV	rs765056335					2359	2	2357	0.000847817
chr16	72135060	72135060	C	T	snp	exonic	DHX38	nonsynonymous SNV	rs146195196			8.95E-06		2360	2	2357	0.000847817
chr14	24709772	24709772	C	A	snp	exonic	TINF2	nonsynonymous SNV	rs746657282			0		2358	2	2356	0.000848176
chr3	48508737	48508737	C	T	snp	exonic	TREX1	nonsynonymous SNV	rs777802035			1.79E-05		2358	2	2356	0.000848176
chr2	238285612	238285612	C	A	snp	exonic	COL6A3	nonsynonymous SNV	rs750617896			0		2355	2	2353	0.000849257
chr7	143092446	143092446	C	T	snp	exonic	EPHA1	synonymous SNV	rs148018022			8.95E-06		2356	2	2353	0.000849257
chr16	85100869	85100869	G	A	snp	exonic	KIAA0513	synonymous SNV	rs201680079			3.59E-05	0	2354	2	2352	0.000849618
chr3	48716416	48716416	T	C	snp	intronic	NCKIPSD		rs201796592			0		2354	2	2352	0.000849618
chr5	1278744	1278744	C	T	snp	intronic	TERT		rs756363405			2.69E-05	0	2354	2	2352	0.000849618
chr9	34996474	34996474	G	A	snp	exonic	DNAJB5	nonsynonymous SNV	rs150475871			0.0004	0.0003	2353	2	2351	0.000849979
chr11	123900711	123900711	C	T	snp	exonic	OR10G8	nonsynonymous SNV	rs773515571			0		2354	2	2351	0.000849979
chr19	56369339	56369339	A	C	snp	exonic	NLRP4	synonymous SNV	rs867204854					2354	2	2351	0.000849979
chr1	22902826	22902826	C	T	snp	exonic	EPHA8	synonymous SNV	rs145476843			0.0006	0.0003	2352	2	2350	0.00085034
chr1	109794099	109794099	G	A	snp	exonic	CELSR2	synonymous SNV	rs200405611			8.96E-06		2352	2	2350	0.00085034
chr18	44260213	44260213	G	A	snp	exonic	ST8SIA5	nonsynonymous SNV	rs765159220			8.95E-06		2350	2	2348	0.000851064
chr19	4511761	4511761	C	G	snp	exonic	PLIN4	synonymous SNV	rs371498414			3.58E-05	0.0001	2351	2	2348	0.000851064
chr1	176564298	176564298	C	T	snp	exonic	PAPPA2	nonsynonymous SNV	rs775169340			3.58E-05	6.67E-05	2351	2	2348	0.000851064
chr19	8464838	8464838	C	T	snp	exonic	RAB11B	synonymous SNV	rs183832730			8.96E-06	0	2349	2	2347	0.000851426
chr16	12297220	12297220	C	T	snp	intronic	SNX29		rs565997417					2349	2	2347	0.000851426
chr17	1961676	1961676	C	T	snp	exonic	HIC1	synonymous SNV	rs762706390			0		2349	2	2347	0.000851426
chr1	152327724	152327724	G	A	snp	exonic	FLG2	synonymous SNV	rs762899864			0		3521	3	3518	0.000852031
chr3	101540541	101540541	C	T	snp	exonic	NXPE3	nonsynonymous SNV	rs200832757					2347	2	2345	0.000852152
chr10	7621741	7621741	C	T	snp	exonic	ITIH5	synonymous SNV	rs753881180			0	6.67E-05	2346	2	2344	0.000852515
chr3	195511275	195511275	T	C	snp	exonic	MUC4	synonymous SNV	rs539222111					2345	2	2343	0.000852878
chr16	86575335	86575335	G	A	snp	exonic	MTHFSD	nonsynonymous SNV	rs568486979			0	0	2345	2	2343	0.000852878
chr3	195513154	195513154	G	T	snp	exonic	MUC4	nonsynonymous SNV	rs769274370			0.0001	0.0002	2346	2	2343	0.000852878
chr7	21943823	21943823	G	A	snp	exonic	CDCA7L	nonsynonymous SNV	rs149281501			8.98E-06		2343	2	2341	0.000853606
chr14	24032805	24032805	A	G	snp	exonic	AP1G2	synonymous SNV	rs201144415			0.0002	0.0001	2343	2	2341	0.000853606
chr12	6859404	6859404	G	A	snp	exonic	MLF2	nonsynonymous SNV	rs746297905			0	0	2343	2	2341	0.000853606
chr11	498605	498605	C	T	snp	exonic	RNH1	nonsynonymous SNV	rs770077696					2343	2	2341	0.000853606
chr9	34996468	34996468	G	A	snp	exonic	DNAJB5	nonsynonymous SNV	rs781541135			8.95E-06		2344	2	2341	0.000853606
chr1	153963226	153963226	T	C	snp	upstream	RPS27		rs370598265			0		2342	2	2340	0.000853971
chr2	73868447	73868447	A	G	snp	exonic	NAT8	synonymous SNV	rs749134012					2342	2	2340	0.000853971
chr17	7369215	7369215	C	T	snp	exonic	ZBTB4	synonymous SNV	rs373187012			0	0	2341	2	2339	0.000854336
chr17	80040911	80040911	C	T	snp	exonic	FASN	synonymous SNV	rs373472882			3.60E-05	0.0001	2341	2	2339	0.000854336
chr2	219511017	219511017	T	C	snp	exonic	ZNF142	nonsynonymous SNV	rs770718555			8.95E-06		2341	2	2339	0.000854336
chr1	160106548	160106548	C	T	snp	intronic	ATP1A2		rs116629683			0.0002	0.0001	2342	2	2339	0.000854336
chr19	4512031	4512031	C	A	snp	exonic	PLIN4	synonymous SNV	rs112937743			7.17E-05	0.0001	2340	2	2338	0.000854701
chr16	2111906	2111906	A	G	snp	exonic	TSC2	nonsynonymous SNV	rs757353933			0		2340	2	2338	0.000854701
chr19	2790577	2790577	G	A	snp	exonic	THOP1	nonsynonymous SNV	rs751089333			0		2339	2	2337	0.000855066
chr2	3391511	3391511	C	T	snp	exonic	TRAPPC12	synonymous SNV	rs752727223			9.34E-06	0	2339	2	2337	0.000855066
chr12	40884653	40884653	G	A	snp	exonic	MUC19	unknown	rs12822682					2338	2	2336	0.000855432
chr17	61987934	61987934	G	T	snp	intronic	CSHL1		rs373084242			2.69E-05		2338	2	2336	0.000855432
chr18	59221615	59221615	G	A	snp	exonic	CDH20	nonsynonymous SNV	rs751665923			2.72E-05		2338	2	2336	0.000855432
chr19	4511994	4511994	C	T	snp	exonic	PLIN4	nonsynonymous SNV	rs770863550			0	0	2339	2	2336	0.000855432
chr1	152323839	152323839	G	A	snp	exonic	FLG2	synonymous SNV	rs748200639			8.96E-06	0.0001	2336	2	2334	0.000856164
chr19	1978977	1978977	C	T	snp	exonic	CSNK1G2	synonymous SNV	rs776935966			2.74E-05		2336	2	2334	0.000856164
chr3	52428537	52428537	G	A	snp	exonic	DNAH1	synonymous SNV	rs372328204			0	0	2335	2	2333	0.000856531
chr19	56369349	56369349	C	T	snp	exonic	NLRP4	nonsynonymous SNV	rs761163466			8.95E-06	6.66E-05	2335	2	2333	0.000856531
chr19	55378152	55378152	G	A	snp	exonic	KIR3DL2	nonsynonymous SNV	rs370395426			4.48E-05	0	2334	2	2332	0.000856898
chr2	36706769	36706769	C	T	snp	exonic	CRIM1	nonsynonymous SNV	rs779719906			8.95E-06		2334	2	2332	0.000856898
chr1	152191859	152191859	G	T	snp	exonic	HRNR	nonsynonymous SNV	rs781369065			8.95E-06	0	2334	2	2332	0.000856898
chr1	152328113	152328113	A	G	snp	exonic	FLG2	nonsynonymous SNV	rs774741236			8.95E-06		3501	3	3498	0.000856898
chr3	195512810	195512810	C	A	snp	exonic	MUC4	nonsynonymous SNV	rs751222260			1.66E-05	6.94E-05	2333	2	2331	0.000857265
chr19	2987095	2987095	C	T	snp	exonic	TLE6	nonsynonymous SNV	rs199812275			4.48E-05		2332	2	2330	0.000857633
chr8	104427366	104427366	G	A	snp	exonic	DCAF13	nonsynonymous SNV	rs370523537			1.85E-05		2332	2	2330	0.000857633
chr22	18111382	18111382	T	C	snp	exonic	ATP6V1E1	nonsynonymous SNV	rs768949211			8.95E-06		2332	2	2330	0.000857633
chr1	6697416	6697416	G	A	snp	intronic	DNAJC11		rs756203458			3.58E-05		2331	2	2329	0.000858001
chr10	15255497	15255497	C	G	snp	exonic	FAM171A1	nonsynonymous SNV	rs146450035			0	0	2330	2	2328	0.000858369
chr13	111372032	111372032	C	T	snp	exonic	ING1	nonsynonymous SNV	rs563266503					2330	2	2328	0.000858369
chr1	109793504	109793504	G	A	snp	exonic	CELSR2	nonsynonymous SNV	rs747847093			1.79E-05		2330	2	2328	0.000858369
chr9	2643458	2643458	C	T	snp	exonic	VLDLR	synonymous SNV	rs760542770			8.96E-06		2330	2	2328	0.000858369
chr21	45860640	45860640	G	A	snp	intronic	TRPM2		rs375430815			8.99E-06	0.0001	2329	2	2327	0.000858738
chr14	64921550	64921550	G	A	snp	exonic	MTHFD1	nonsynonymous SNV	rs758973638			8.96E-06	0.0001	2329	2	2327	0.000858738
chr22	24582047	24582047	G	A	snp	exonic	SUSD2	nonsynonymous SNV	rs373308966			0		2328	2	2326	0.000859107
chr1	151259946	151259946	T	C	snp	exonic	ZNF687	synonymous SNV	rs773251030			8.96E-06		2327	2	2325	0.000859476
chr17	74288779	74288779	G	A	snp	exonic	QRICH2	stopgain	rs141454935			0		2326	2	2324	0.000859845
chr4	6303734	6303734	G	A	snp	exonic	WFS1	nonsynonymous SNV	rs563972671			9.23E-06		2326	2	2324	0.000859845
chr19	14067032	14067032	G	A	snp	exonic	DCAF15	nonsynonymous SNV	rs745331006			9.09E-06		2326	2	2324	0.000859845
chr2	97427425	97427425	G	A	snp	exonic	CNNM4	nonsynonymous SNV	rs760464330			0		2326	2	2324	0.000859845
chr1	152283481	152283481	T	C	snp	exonic	FLG	nonsynonymous SNV	rs767364721			8.95E-06	0	2325	2	2323	0.000860215
chr9	38396151	38396151	G	A	snp	exonic	ALDH1B1	nonsynonymous SNV	rs138929946			1.80E-05		2324	2	2322	0.000860585
chr3	101540509	101540509	G	A	snp	exonic	NXPE3	nonsynonymous SNV	rs200277463				6.66E-05	2323	2	2321	0.000860956
chr1	152323409	152323409	G	T	snp	exonic	FLG2	nonsynonymous SNV	rs757009784			0		2323	2	2321	0.000860956
chr17	21207730	21207730	C	G	snp	intronic	MAP2K3		rs374982158					2322	2	2320	0.000861326
chr21	47552344	47552344	G	A	snp	exonic	COL6A2	nonsynonymous SNV	rs140020002			0	0	2323	2	2320	0.000861326
chr14	24032794	24032794	G	A	snp	exonic	AP1G2	nonsynonymous SNV	rs370083184			3.58E-05	6.68E-05	2321	2	2319	0.000861698
chr19	38092055	38092055	G	A	snp	intronic	ZNF540		rs371666707			3.53E-05		2319	2	2317	0.000862441
chr11	65307006	65307006	C	T	snp	intronic	LTBP3		rs754754669			0		2319	2	2317	0.000862441
chr22	26105971	26105971	C	T	snp	intronic	GRK3		rs771113251			2.70E-05		3477	3	3474	0.000862813
chr16	86575334	86575334	C	T	snp	exonic	MTHFSD	nonsynonymous SNV	rs367736262			0		2317	2	2315	0.000863185
chr3	170244517	170244517	C	G	snp	exonic	SLC7A14	nonsynonymous SNV	rs766622750			8.95E-06		2318	2	2315	0.000863185
chr18	44260433	44260433	C	T	snp	exonic	ST8SIA5	nonsynonymous SNV	rs371266233			0		2316	2	2314	0.000863558
chr3	195512871	195512871	G	A	snp	exonic	MUC4	synonymous SNV	rs535251161			0	0	2316	2	2314	0.000863558
chr8	145154303	145154303	C	T	snp	exonic	SHARPIN	nonsynonymous SNV	rs368101996			9.07E-06		2315	2	2313	0.000863931
chr22	38061822	38061822	G	A	snp	exonic	PDXP	nonsynonymous SNV	rs755786722			0		2314	2	2312	0.000864304
chr12	130926824	130926824	C	T	snp	exonic	RIMBP2	nonsynonymous SNV	rs758515307			8.95E-06		2314	2	2312	0.000864304
chr17	80054182	80054182	C	T	snp	intronic	FASN		rs761252835			0		2313	2	2311	0.000864678
chr1	1248283	1248283	G	A	snp	exonic	INTS11	nonsynonymous SNV	rs771300845			4.51E-05		2313	2	2311	0.000864678
chr20	47866043	47866043	G	A	snp	exonic	ZNFX1	nonsynonymous SNV	rs200789034					2312	2	2310	0.000865052
chr4	6374292	6374292	G	A	snp	exonic	PPP2R2C	nonsynonymous SNV	rs747980900			8.96E-06		2312	2	2310	0.000865052
chr1	77510110	77510110	C	T	snp	exonic	ST6GALNAC5	synonymous SNV	rs769598284			0		2312	2	2310	0.000865052
chr1	22902888	22902888	G	A	snp	exonic	EPHA8	nonsynonymous SNV	rs759833113			0		2311	2	2309	0.000865426
chr11	6661710	6661710	C	T	snp	exonic	DCHS1	nonsynonymous SNV	rs764551786			8.97E-06		2311	2	2309	0.000865426
chr19	10817940	10817940	G	A	snp	intronic	QTRT1		rs769343159			4.49E-05		2311	2	2309	0.000865426
chr14	77492901	77492901	C	T	snp	exonic	IRF2BPL	nonsynonymous SNV	rs760312066			0		2312	2	2309	0.000865426
chr2	241404098	241404098	G	A	snp	exonic	GPC1	nonsynonymous SNV	rs200045063			5.40E-05	6.68E-05	2309	2	2307	0.000866176
chr7	128845118	128845118	G	T	snp	exonic	SMO	nonsynonymous SNV	rs758505705			2.69E-05		2309	2	2307	0.000866176
chr18	47500857	47500857	C	T	snp	exonic	MYO5B	synonymous SNV	rs765441720			8.97E-06		2309	2	2307	0.000866176
chr4	6303716	6303716	C	T	snp	exonic	WFS1	nonsynonymous SNV	rs71526458	Uncertain significance	Monogenic_diabetes	5.51E-05		2308	2	2306	0.000866551
chr9	38396185	38396185	G	A	snp	exonic	ALDH1B1	nonsynonymous SNV	rs770591719			5.39E-05	0.0005	2308	2	2306	0.000866551
chr14	77492902	77492902	C	T	snp	exonic	IRF2BPL	nonsynonymous SNV	rs766043566			8.98E-06		2307	2	2305	0.000866927
chr4	6303747	6303747	G	A	snp	exonic	WFS1	nonsynonymous SNV	rs775216682			1.84E-05	6.67E-05	2307	2	2305	0.000866927
chr19	4511007	4511007	C	T	snp	exonic	PLIN4	nonsynonymous SNV	rs749302597			0		2306	2	2304	0.000867303
chr13	111372020	111372020	C	T	snp	exonic	ING1	nonsynonymous SNV	rs376816952			1.80E-05	6.68E-05	2305	2	2303	0.000867679
chr20	62421630	62421630	C	T	snp	exonic	ZBTB46	nonsynonymous SNV	rs375790108			9.05E-06		2304	2	2302	0.000868056
chr3	56468756	56468756	G	A	snp	exonic	ERC2	nonsynonymous SNV	rs369750182			2.69E-05	0	2303	2	2301	0.000868432
chr21	46875818	46875818	T	C	snp	exonic	COL18A1	nonsynonymous SNV	rs570051194			0		2303	2	2301	0.000868432
chr20	58514411	58514411	C	T	snp	exonic	PPP1R3D	synonymous SNV	rs763503005			0		2303	2	2301	0.000868432
chr19	56538802	56538802	T	C	snp	exonic	NLRP5	synonymous SNV	rs530270298			0		2302	2	2300	0.00086881
chr3	137483900	137483900	T	C	snp	exonic	SOX14	nonsynonymous SNV	rs765335786			8.95E-06		2302	2	2300	0.00086881
chr7	97822898	97822898	G	A	snp	exonic	LMTK2	nonsynonymous SNV	rs775823152			0		2303	2	2300	0.00086881
chr1	27440551	27440551	G	A	snp	exonic	SLC9A1	synonymous SNV	rs374434792			1.79E-05		2301	2	2299	0.000869187
chr14	105517775	105517775	G	A	snp	exonic	GPR132	synonymous SNV	rs75775050			0.0004	0.0003	2300	2	2298	0.000869565
chr3	170244535	170244535	C	A	snp	exonic	SLC7A14	nonsynonymous SNV	rs140384927			0	0	2299	2	2297	0.000869943
chr5	140683151	140683151	T	C	snp	exonic	SLC25A2	synonymous SNV	rs578099333			0		2299	2	2297	0.000869943
chr7	100676274	100676274	C	A	snp	exonic	MUC17	nonsynonymous SNV	rs146143829			0	0	2298	2	2296	0.000870322
chr8	144940649	144940649	G	A	snp	exonic	EPPK1	nonsynonymous SNV	rs200167763			9.11E-05	6.69E-05	3446	3	3443	0.000870575
chr3	141497325	141497325	C	T	snp	exonic	GRK7	nonsynonymous SNV	rs751671473			0		2297	2	2295	0.000870701
chr3	122634465	122634465	G	T	snp	exonic	SEMA5B	synonymous SNV	rs757738307			9.06E-06		2296	2	2294	0.00087108
chr3	53326337	53326337	G	A	snp	exonic	DCP1A	nonsynonymous SNV	rs200543667			3.59E-05	6.66E-05	2295	2	2293	0.00087146
chr17	35297873	35297873	C	T	snp	intronic	LHX1		rs369570490				0	2295	2	2293	0.00087146
chr5	140811752	140811752	G	A	snp	exonic	PCDHGA12	nonsynonymous SNV	rs376661062			0	0	2295	2	2293	0.00087146
chr11	65306992	65306992	G	A	snp	intronic	LTBP3		rs751832241			1.90E-05		2293	2	2291	0.00087222
chr3	194081448	194081448	C	T	snp	exonic	LRRC15	nonsynonymous SNV	rs372164095			8.96E-06		2292	2	2290	0.0008726
chr17	19186704	19186704	G	A	snp	exonic	EPN2	nonsynonymous SNV	rs750259068			8.96E-06		2292	2	2290	0.0008726
chr5	180338544	180338544	C	T	snp	exonic	BTNL8	synonymous SNV	rs755118033			1.80E-05	0	2292	2	2290	0.0008726
chr21	47552340	47552340	C	T	snp	exonic	COL6A2	synonymous SNV	rs139814466			4.63E-05		2291	2	2289	0.000872981
chr3	9870798	9870798	G	A	snp	exonic	ARPC4-TTLL3;TTLL3	nonsynonymous SNV	rs373395777			2.69E-05	0	2291	2	2289	0.000872981
chr12	7309322	7309322	C	T	snp	intronic	CLSTN3		rs753859441			5.85E-05	0.0007	2291	2	2289	0.000872981
chr19	7584297	7584297	G	A	snp	exonic	ZNF358	nonsynonymous SNV	rs748092806			8.96E-06		2292	2	2289	0.000872981
chr3	122634494	122634494	C	A	snp	intronic	SEMA5B		rs757846801			9.18E-06		2290	2	2288	0.000873362
chr6	44223036	44223036	C	T	snp	exonic	SLC35B2	nonsynonymous SNV	rs145406343			2.69E-05	6.67E-05	2289	2	2287	0.000873744
chr3	183226007	183226007	C	T	snp	exonic	KLHL6	nonsynonymous SNV	rs147922716			0	0	2289	2	2287	0.000873744
chr1	207785334	207785334	C	T	snp	exonic	CR1	nonsynonymous SNV	rs765521072			1.79E-05		2289	2	2287	0.000873744
chr16	29994930	29994930	G	A	snp	exonic	TAOK2	nonsynonymous SNV	rs771711319			2.69E-05		3433	3	3430	0.000873871
chr2	133540491	133540491	C	T	snp	exonic	NCKAP5	nonsynonymous SNV	rs545006757			0		2288	2	2286	0.000874126
chr20	18123484	18123484	C	T	snp	exonic	KAT14	synonymous SNV	rs756739367			1.82E-05	0	2288	2	2286	0.000874126
chr4	2010610	2010610	G	A	snp	exonic	NELFA	nonsynonymous SNV	rs779059727			2.27E-05		2288	2	2286	0.000874126
chr1	1248342	1248342	C	T	snp	intronic	INTS11		rs372810149			4.55E-05	6.67E-05	2287	2	2285	0.000874508
chr20	58514387	58514387	G	A	snp	exonic	PPP1R3D	synonymous SNV	rs751359121			3.73E-05		2287	2	2285	0.000874508
chr6	292585	292585	G	A	snp	intronic	DUSP22		rs765167793			0		2286	2	2284	0.000874891
chr1	1249098	1249098	G	A	snp	intronic	INTS11		rs367770919			7.22E-05		2285	2	2283	0.000875274
chr17	8092579	8092579	C	T	snp	exonic	BORCS6	nonsynonymous SNV	rs576087759			0		2285	2	2283	0.000875274
chr19	56369489	56369489	G	A	snp	exonic	NLRP4	nonsynonymous SNV	rs775533945			9.85E-05	6.67E-05	2285	2	2283	0.000875274
chr16	22926376	22926376	G	A	snp	exonic	HS3ST2	synonymous SNV	rs200403638			0		2284	2	2282	0.000875657
chr16	67236114	67236114	C	T	snp	exonic	ELMO3	synonymous SNV	rs368149935			1.83E-05	6.67E-05	2284	2	2282	0.000875657
chr1	152328835	152328835	G	A	snp	exonic	FLG2	nonsynonymous SNV	rs117676246			1.79E-05	0	3424	3	3421	0.000876168
chr22	45970420	45970420	G	A	snp	exonic	FBLN1	nonsynonymous SNV	rs139132072			4.48E-05	0	2282	2	2280	0.000876424
chr1	1249094	1249094	C	T	snp	intronic	INTS11		rs199574867			0.0011	0.0011	2282	2	2280	0.000876424
chr6	150240408	150240408	G	A	snp	exonic	RAET1G	synonymous SNV	rs549005879			1.79E-05		2282	2	2280	0.000876424
chr21	47545962	47545962	C	T	snp	exonic	COL6A2	nonsynonymous SNV	rs140643748	Uncertain significance	not_specified	3.59E-05	6.68E-05	2281	2	2279	0.000876808
chr17	19282289	19282289	G	A	snp	exonic	MAPK7	nonsynonymous SNV	rs567028407			0	0.0012	2281	2	2279	0.000876808
chr19	830841	830841	G	A	snp	exonic	AZU1	nonsynonymous SNV	rs61732996			0.0015	0.0018	2281	2	2279	0.000876808
chr19	1978968	1978968	C	T	snp	exonic	CSNK1G2	synonymous SNV	rs201198130			6.41E-05	0.0001	2280	2	2278	0.000877193
chr19	42585027	42585027	C	T	snp	exonic	ZNF574	nonsynonymous SNV	rs539408118			9.08E-06		2280	2	2278	0.000877193
chr20	62421631	62421631	G	A	snp	exonic	ZBTB46	synonymous SNV	rs561608118			0		2280	2	2278	0.000877193
chr1	1249088	1249088	G	A	snp	intronic	INTS11		rs757512247			0		2281	2	2278	0.000877193
chr1	151259859	151259859	C	T	snp	exonic	ZNF687	synonymous SNV	rs756076371			0		2279	2	2277	0.000877578
chr1	107599435	107599435	T	C	snp	exonic	PRMT6	nonsynonymous SNV	rs773150946			0		2279	2	2277	0.000877578
chr8	144776623	144776623	G	A	snp	exonic	ZNF707	nonsynonymous SNV	rs559876557			1.81E-05		2278	2	2276	0.000877963
chr4	6303836	6303836	C	T	snp	exonic	WFS1	nonsynonymous SNV	rs149540655			0.0001	6.67E-05	2277	2	2275	0.000878349
chr5	140856576	140856576	A	G	snp	exonic	PCDHGC3	nonsynonymous SNV	rs200625256			8.95E-05		2277	2	2275	0.000878349
chr19	18888163	18888163	G	A	snp	exonic	CRTC1	nonsynonymous SNV	rs760856518			9.06E-06		2277	2	2275	0.000878349
chr12	57589524	57589524	C	T	snp	exonic	LRP1	nonsynonymous SNV	rs762101171			8.96E-06		2277	2	2275	0.000878349
chr11	67376023	67376023	G	T	snp	exonic	NDUFV1	nonsynonymous SNV	rs199609729			0	0	2275	2	2273	0.000879121
chr5	140048068	140048068	C	T	snp	exonic	WDR55	nonsynonymous SNV	rs753701912			0	0	2275	2	2273	0.000879121
chr3	195513013	195513013	C	A	snp	exonic	MUC4	nonsynonymous SNV	rs755873435			0		2275	2	2273	0.000879121
chr21	47545867	47545867	G	A	snp	exonic	COL6A2	nonsynonymous SNV	rs746159648					2273	2	2271	0.000879894
chr3	12978127	12978127	G	A	snp	exonic	IQSEC1	nonsynonymous SNV	rs781305360			0		2273	2	2271	0.000879894
chr7	75617323	75617323	C	T	snp	intronic	TMEM120A		rs782183888			0		2273	2	2271	0.000879894
chr19	49573841	49573841	G	A	snp	exonic	KCNA7	nonsynonymous SNV	rs546430763			0	0	2273	2	2270	0.000880282
chr19	18546392	18546392	A	G	snp	exonic	ISYNA1	nonsynonymous SNV	rs752841720			9.40E-06		2271	2	2269	0.000880669
chr2	29404621	29404621	C	T	snp	exonic	CLIP4	synonymous SNV	rs777100973			8.96E-06		2271	2	2269	0.000880669
chr4	140005270	140005270	A	G	snp	intronic	ELF2		rs551232680			0		2270	2	2268	0.000881057
chr6	13365744	13365744	A	G	snp	exonic	GFOD1	nonsynonymous SNV	rs763810182			0		2270	2	2268	0.000881057
chr9	111625805	111625805	C	T	snp	exonic	ACTL7A	synonymous SNV	rs752301041			2.69E-05		2271	2	2268	0.000881057
chr10	96826946	96826946	G	A	snp	intronic	CYP2C8		rs375369698			1.79E-05		2269	2	2267	0.000881446
chr8	26721941	26721941	C	T	snp	exonic	ADRA1A	synonymous SNV	rs376900241					2269	2	2267	0.000881446
chr20	61990929	61990929	C	T	snp	exonic	CHRNA4	nonsynonymous SNV	rs750325388			0		2269	2	2267	0.000881446
chr3	52018108	52018108	C	T	snp	exonic	ABHD14A-ACY1;ACY1	nonsynonymous SNV	rs760608041			8.97E-06		2269	2	2267	0.000881446
chr17	19186594	19186594	G	A	snp	exonic	EPN2	synonymous SNV	rs374633294			0	0	2268	2	2266	0.000881834
chr2	3391503	3391503	G	A	snp	exonic	TRAPPC12	nonsynonymous SNV	rs767513378			0		2268	2	2266	0.000881834
chr4	2010612	2010612	C	T	snp	exonic	NELFA	synonymous SNV	rs758404249			0		2267	2	2265	0.000882223
chr12	56863037	56863037	C	T	snp	exonic	SPRYD4	synonymous SNV	rs186883320			0	0	2268	2	2265	0.000882223
chr19	10939804	10939804	G	A	snp	exonic	DNM2	synonymous SNV	rs543921898			0	0	2266	2	2264	0.000882613
chr7	50468170	50468170	G	A	snp	exonic	IKZF1	nonsynonymous SNV	rs750786723			0		2266	2	2264	0.000882613
chr9	2643480	2643480	C	T	snp	exonic	VLDLR	stopgain	rs80338907	Pathogenic|Pathogenic	Cerebellar_ataxia_and_mental_retardation_with_quadrupedal_locomotion_1|Cerebellar_ataxia\x2c_mental_retardation\x2c_and_dysequilibrium_syndrome_1			2266	2	2264	0.000882613
chr19	1105194	1105194	C	T	snp	exonic	GPX4	unknown	rs755235087			2.71E-05		2265	2	2263	0.000883002
chr21	47545866	47545866	C	T	snp	exonic	COL6A2	nonsynonymous SNV	rs139627965					2264	2	2262	0.000883392
chr9	136131569	136131569	G	A	snp	exonic	ABO	unknown	rs782556804			9.22E-06		2264	2	2262	0.000883392
chr9	127636013	127636013	T	C	snp	exonic	ARPC5L	synonymous SNV	rs764428717			3.58E-05		2263	2	2261	0.000883783
chr17	40459577	40459577	C	A	snp	intronic	STAT5A		rs754555372					2264	2	2261	0.000883783
chr5	1278864	1278864	C	T	snp	exonic	TERT	synonymous SNV	rs199422288	Benign|Likely benign|Likely benign	Dyskeratosis_congenita_autosomal_dominant|Dyskeratosis_congenita\x2c_autosomal_dominant\x2c_2|Idiopathic_fibrosing_alveolitis\x2c_chronic_form	1.79E-05	0	2262	2	2260	0.000884173
chr11	65306980	65306980	G	A	snp	intronic	LTBP3		rs372166986			1.98E-05		2262	2	2260	0.000884173
chr22	26888056	26888056	G	A	snp	exonic	TFIP11	nonsynonymous SNV	rs773624109			9.01E-06		2262	2	2260	0.000884173
chr19	10943817	10943817	C	T	snp	exonic	TMED1	nonsynonymous SNV	rs560548774			0		2261	2	2259	0.000884564
chr3	50679176	50679176	G	A	snp	exonic	MAPKAPK3	nonsynonymous SNV	rs763883941			0		2261	2	2259	0.000884564
chr19	54969502	54969502	C	T	snp	exonic	LENG8	nonsynonymous SNV	rs769724812			2.72E-05		2261	2	2259	0.000884564
chr8	61655311	61655311	T	C	snp	exonic	CHD7	synonymous SNV	rs866908652					2261	2	2259	0.000884564
chr7	73609212	73609212	C	T	snp	intronic	EIF4H		rs374107606			1.88E-05	6.67E-05	2260	2	2258	0.000884956
chr19	10818047	10818047	C	T	snp	exonic	QTRT1	nonsynonymous SNV	rs756008812			0		2260	2	2258	0.000884956
chr1	109794003	109794003	G	A	snp	exonic	CELSR2	synonymous SNV	rs781385956			0		2259	2	2257	0.000885347
chr17	8052954	8052954	G	A	snp	exonic	PER1	synonymous SNV	rs568686489			0	0.0001	2258	2	2256	0.00088574
chr6	292536	292536	C	A	snp	UTR5	DUSP22		rs753245438			1.89E-05		2258	2	2256	0.00088574
chr10	50946021	50946021	C	T	snp	exonic	OGDHL	nonsynonymous SNV	rs772974122			2.69E-05	0	2258	2	2256	0.00088574
chr19	36128103	36128103	C	T	snp	exonic	RBM42	synonymous SNV	rs201539955			8.96E-06	0	2257	2	2255	0.000886132
chr5	457023	457023	G	A	snp	exonic	EXOC3	nonsynonymous SNV	rs530637200			0		2257	2	2255	0.000886132
chr21	47545982	47545982	C	T	snp	exonic	COL6A2	synonymous SNV	rs747494120			1.80E-05	0	2257	2	2255	0.000886132
chr2	133540521	133540521	G	A	snp	exonic	NCKAP5	nonsynonymous SNV	rs765048071			1.79E-05	0	2257	2	2255	0.000886132
chr4	6303746	6303746	T	C	snp	exonic	WFS1	nonsynonymous SNV	rs71532865					2256	2	2254	0.000886525
chr1	17314904	17314904	C	T	snp	exonic	ATP13A2	nonsynonymous SNV	rs756683120			1.79E-05		2256	2	2254	0.000886525
chr1	1248278	1248278	C	T	snp	exonic	INTS11	nonsynonymous SNV	rs778570936			0		2256	2	2254	0.000886525
chr5	1278865	1278865	G	A	snp	exonic	TERT	nonsynonymous SNV	rs149566858	Pathogenic|Uncertain significance|Uncertain significance	Dyskeratosis_congenita_autosomal_dominant|Dyskeratosis_congenita\x2c_autosomal_dominant\x2c_2|Idiopathic_fibrosing_alveolitis\x2c_chronic_form	6.27E-05	0.0002	2257	2	2254	0.000886525
chr10	7621812	7621812	C	T	snp	exonic	ITIH5	nonsynonymous SNV	rs764319928			0		2255	2	2253	0.000886918
chr8	144776549	144776549	G	A	snp	exonic	ZNF707	nonsynonymous SNV	rs782066047			2.72E-05	0	2255	2	2253	0.000886918
chr4	6303640	6303640	C	T	snp	exonic	WFS1	synonymous SNV	rs375408391			2.70E-05		2254	2	2252	0.000887311
chr17	19186722	19186722	G	A	snp	exonic	EPN2	nonsynonymous SNV	rs753787529			8.95E-06	0	2254	2	2252	0.000887311
chr11	1031906	1031906	C	T	snp	exonic	MUC6	nonsynonymous SNV	rs547156930			3.59E-05	0	2255	2	2252	0.000887311
chr14	77492909	77492909	G	A	snp	exonic	IRF2BPL	synonymous SNV	rs758337885			0		2253	2	2251	0.000887705
chr17	21318769	21318769	C	T	snp	exonic	KCNJ12;KCNJ18	nonsynonymous SNV	rs374903521			3.58E-05	0	4507	4	4502	0.000887705
chr9	34371695	34371695	G	A	snp	exonic	KIAA1161	unknown	rs755669868			1.89E-05		2252	2	2250	0.000888099
chr9	124522280	124522280	C	T	snp	exonic	DAB2IP	synonymous SNV	rs777638226			0		2252	2	2250	0.000888099
chr1	144931637	144931637	C	T	snp	exonic	PDE4DIP	synonymous SNV	rs587649629			0	0	2251	2	2249	0.000888494
chr11	46406856	46406856	C	T	snp	exonic	CHRM4	nonsynonymous SNV	rs200588248			2.69E-05	6.67E-05	2250	2	2248	0.000888889
chr2	29117696	29117696	C	T	snp	exonic	WDR43	synonymous SNV	rs753217533					2250	2	2248	0.000888889
chr16	49671604	49671604	C	T	snp	exonic	ZNF423	nonsynonymous SNV	rs866711600			0		2251	2	2248	0.000888889
chr11	118984900	118984900	A	G	snp	exonic	C2CD2L	synonymous SNV	rs757995012				6.68E-05	2249	2	2247	0.000889284
chr19	10335109	10335109	A	G	snp	exonic	S1PR2	nonsynonymous SNV	rs752132394			0		2250	2	2247	0.000889284
chr19	9059181	9059181	G	A	snp	exonic	MUC16	nonsynonymous SNV	rs12459532			0.0192	0.023	2248	2	2246	0.00088968
chr14	24709942	24709942	C	T	snp	exonic	TINF2	synonymous SNV	rs138197619			9.05E-06		2247	2	2245	0.000890076
chr16	3170053	3170053	C	T	snp	exonic	ZNF205	synonymous SNV	rs771564916			0		2247	2	2245	0.000890076
chr8	88885677	88885677	C	T	snp	exonic	DCAF4L2	nonsynonymous SNV	rs373178646			0		2246	2	2244	0.000890472
chr7	97823654	97823654	G	A	snp	exonic	LMTK2	nonsynonymous SNV	rs749590234			0		2246	2	2244	0.000890472
chr19	16620735	16620735	A	G	snp	exonic	C19orf44	synonymous SNV	rs749637051			0		2246	2	2244	0.000890472
chr1	152323924	152323924	A	C	snp	exonic	FLG2	nonsynonymous SNV	rs752116417			2.69E-05	0.0117	2246	2	2244	0.000890472
chr1	121485302	121485302	A	G	snp	intergenic	EMBP1;NONE		rs28972056					2246	2	2243	0.000890869
chr19	10943684	10943684	G	A	snp	exonic	TMED1	nonsynonymous SNV	rs748536499			8.98E-06		2246	2	2243	0.000890869
chr17	56621397	56621397	G	A	snp	exonic	C17orf47	stopgain	rs746438429			8.96E-06		2244	2	2242	0.000891266
chr11	65306973	65306973	G	A	snp	intronic	LTBP3		rs763764203					2244	2	2242	0.000891266
chr14	24573081	24573081	C	T	snp	exonic	PCK2	nonsynonymous SNV	rs757554278			4.48E-05	0	2245	2	2242	0.000891266
chr3	49866639	49866639	C	T	snp	exonic	TRAIP	nonsynonymous SNV	rs148292576			2.69E-05		2243	2	2241	0.000891663
chr11	1213343	1213343	T	C	snp	exonic	MUC5AC	unknown	rs767118931			9.50E-06		4486	4	4482	0.000891663
chr9	139972966	139972966	C	T	snp	exonic	UAP1L1	synonymous SNV	rs113582148			0.0009	0.0004	2241	2	2239	0.000892459
chr9	34371764	34371764	G	A	snp	exonic	KIAA1161	unknown	rs762939924			0		2241	2	2239	0.000892459
chr19	56538833	56538833	G	A	snp	exonic	NLRP5	nonsynonymous SNV	rs747423013			8.97E-06	0	2240	2	2238	0.000892857
chr9	34996743	34996743	C	T	snp	exonic	DNAJB5	synonymous SNV	rs778208193			1.80E-05	0.0001	2240	2	2238	0.000892857
chr3	53326308	53326308	C	T	snp	exonic	DCP1A	nonsynonymous SNV	rs781811358			0		2240	2	2238	0.000892857
chr1	21936685	21936685	G	A	snp	exonic	RAP1GAP	synonymous SNV	rs556073567			5.37E-05	6.67E-05	2239	2	2237	0.000893256
chr14	105453078	105453078	C	T	snp	exonic	C14orf79	nonsynonymous SNV	rs772671282			0		2239	2	2237	0.000893256
chr19	7964289	7964289	G	A	snp	exonic	LRRC8E	synonymous SNV	rs139104594			0	0	2238	2	2236	0.000893655
chr8	139833498	139833498	C	T	snp	exonic	COL22A1	nonsynonymous SNV	rs187494226			0	0	2238	2	2236	0.000893655
chr1	154744507	154744507	G	A	snp	exonic	KCNN3	synonymous SNV	rs367863664			1.79E-05		2238	2	2236	0.000893655
chr16	21531487	21531487	C	T	snp	ncRNA_exonic	SLC7A5P2		rs776102640			0		2238	2	2236	0.000893655
chr3	195513164	195513164	C	A	snp	exonic	MUC4	nonsynonymous SNV	rs758953964			1.66E-05		2237	2	2235	0.000894055
chr1	77510126	77510126	G	A	snp	exonic	ST6GALNAC5	nonsynonymous SNV	rs767341692			4.50E-05	0	2237	2	2235	0.000894055
chr12	122255753	122255753	G	A	snp	exonic	SETD1B	nonsynonymous SNV	rs767902875			0	0	3355	3	3352	0.000894188
chr19	4511757	4511757	C	T	snp	exonic	PLIN4	nonsynonymous SNV	rs74627313			0.0008	0.0008	2236	2	2234	0.000894454
chr19	10335121	10335121	G	A	snp	exonic	S1PR2	nonsynonymous SNV	rs748326799			8.99E-06		2236	2	2234	0.000894454
chr11	72491213	72491213	C	T	snp	intronic	STARD10		rs774543602			2.30E-05	0	2236	2	2234	0.000894454
chr21	47545972	47545972	G	A	snp	exonic	COL6A2	nonsynonymous SNV	rs200072495	Uncertain significance	not_specified	0.0001	0	2235	2	2233	0.000894855
chr19	10335365	10335365	C	T	snp	exonic	S1PR2	nonsynonymous SNV	rs756238075					2235	2	2233	0.000894855
chr20	32436472	32436472	C	T	snp	intronic	CHMP4B		rs368393792			0.0004	0.0002	2236	2	2233	0.000894855
chr1	154316888	154316888	G	A	snp	exonic	ATP8B2	nonsynonymous SNV	rs751021127			2.69E-05	0	2236	2	2233	0.000894855
chr10	100017802	100017802	G	A	snp	exonic	LOXL4	synonymous SNV	rs112540326			1.79E-05	0	2234	2	2232	0.000895255
chr19	56369527	56369527	G	A	snp	exonic	NLRP4	synonymous SNV	rs140962628			1.79E-05	6.66E-05	2233	2	2231	0.000895656
chr6	151766446	151766446	G	A	snp	exonic	RMND1	synonymous SNV	rs374790732			3.68E-05		2233	2	2231	0.000895656
chr1	152285572	152285572	C	A	snp	exonic	FLG	nonsynonymous SNV	rs766406566			3.58E-05	0.0007	2233	2	2231	0.000895656
chr8	139833490	139833490	C	T	snp	exonic	COL22A1	synonymous SNV	rs775879371			0		2233	2	2231	0.000895656
chr19	18313528	18313528	C	T	snp	exonic	RAB3A	nonsynonymous SNV	rs367923648			1.79E-05	6.67E-05	2232	2	2230	0.000896057
chr18	47500835	47500835	C	T	snp	exonic	MYO5B	nonsynonymous SNV	rs529555831			0		2232	2	2230	0.000896057
chr10	72195190	72195190	C	T	snp	exonic	NODAL	nonsynonymous SNV	rs762350525			8.95E-06	0.0001	2232	2	2230	0.000896057
chr10	391043	391043	C	T	snp	exonic	DIP2C	nonsynonymous SNV	rs762410144			3.63E-05		2232	2	2230	0.000896057
chr3	101540490	101540490	C	T	snp	exonic	NXPE3	nonsynonymous SNV	rs781572583			8.95E-06		2231	2	2229	0.000896459
chr17	21319068	21319068	C	T	snp	exonic	KCNJ12;KCNJ18	synonymous SNV	rs371084705			8.97E-06	0	2230	2	2228	0.000896861
chr19	4512043	4512043	G	A	snp	exonic	PLIN4	synonymous SNV	rs549876172			0		2230	2	2228	0.000896861
chr19	42585011	42585011	G	A	snp	exonic	ZNF574	synonymous SNV	rs569304686			4.55E-05	6.67E-05	2230	2	2228	0.000896861
chr20	36767896	36767896	C	A	snp	exonic	TGM2	synonymous SNV	rs756875090			0		2230	2	2228	0.000896861
chr7	142180839	142180839	G	A	snp	intergenic	TRY2P;MTRNR2L6		rs775117358			0.0011	0.0003	2230	2	2228	0.000896861
chr21	47545862	47545862	C	T	snp	exonic	COL6A2	synonymous SNV	rs531816975			8.96E-06	0	2229	2	2227	0.000897263
chr17	1619857	1619857	G	A	snp	UTR5	WDR81		rs766477700					2229	2	2227	0.000897263
chr1	47078872	47078872	C	T	snp	exonic	MOB3C	nonsynonymous SNV	rs769596245			9.00E-06		2228	2	2226	0.000897666
chr15	41192328	41192328	C	T	snp	exonic	VPS18	nonsynonymous SNV	rs780235611			1.80E-05		2229	2	2226	0.000897666
chr1	27440499	27440499	C	T	snp	exonic	SLC9A1	nonsynonymous SNV	rs201506145			8.96E-06		2227	2	2225	0.000898069
chr10	100017801	100017801	C	T	snp	exonic	LOXL4	nonsynonymous SNV	rs376024211			8.97E-06	0	2227	2	2225	0.000898069
chr1	228473933	228473933	C	T	snp	exonic	OBSCN	synonymous SNV	rs376706901			1.81E-05		2227	2	2225	0.000898069
chr22	50279740	50279740	C	T	snp	exonic	ZBED4	synonymous SNV	rs149516364			0.0002	6.67E-05	2226	2	2224	0.000898473
chr12	132325308	132325308	G	A	snp	exonic	MMP17	nonsynonymous SNV	rs747930873			9.11E-06		2225	2	2223	0.000898876
chr1	110884035	110884035	T	C	snp	exonic	RBM15	nonsynonymous SNV	rs760928336			1.79E-05		2225	2	2223	0.000898876
chr3	195512484	195512484	G	A	snp	exonic	MUC4	synonymous SNV	rs777743979			1.55E-05		2225	2	2223	0.000898876
chr20	2312838	2312838	G	T	snp	exonic	TGM3	synonymous SNV	rs747297356			8.97E-06		2224	2	2222	0.000899281
chr3	195513057	195513057	A	C	snp	exonic	MUC4	synonymous SNV	rs764499383			8.15E-05	0.0001	2224	2	2222	0.000899281
chr14	24002781	24002781	C	T	snp	exonic	ZFHX2	nonsynonymous SNV	rs779226138			0		2224	2	2222	0.000899281
chr16	31143863	31143863	G	A	snp	exonic	PRSS8	nonsynonymous SNV	rs779230970			0		2224	2	2222	0.000899281
chr11	121000526	121000526	C	T	snp	exonic	TECTA	synonymous SNV	rs148065839			8.95E-06		2223	2	2221	0.000899685
chr17	76447658	76447658	G	A	snp	exonic	DNAH17	stopgain	rs757777792			0		2223	2	2221	0.000899685
chr1	228528866	228528866	T	C	snp	exonic	OBSCN	nonsynonymous SNV	rs759446903			0		2223	2	2221	0.000899685
chr10	50946042	50946042	T	C	snp	exonic	OGDHL	nonsynonymous SNV	rs760399452			8.95E-06		2223	2	2221	0.000899685
chr19	10335237	10335237	C	T	snp	exonic	S1PR2	synonymous SNV	rs778774106			8.99E-06		2223	2	2221	0.000899685
chr19	39322387	39322387	C	T	snp	exonic	ECH1	nonsynonymous SNV	rs771368717			3.71E-05		2224	2	2221	0.000899685
chr11	65835515	65835515	C	T	snp	exonic	SF3B2	nonsynonymous SNV	rs372951764			2.69E-05		2222	2	2220	0.00090009
chr8	38002807	38002807	A	G	snp	exonic	STAR	nonsynonymous SNV	rs537903614			0	0	2222	2	2220	0.00090009
chr11	67375932	67375932	C	A	snp	exonic	NDUFV1	stopgain	rs200863549					2221	2	2219	0.000900495
chr14	103969396	103969396	C	T	snp	exonic	MARK3	synonymous SNV	rs765072008			8.95E-06		2221	2	2219	0.000900495
chr1	237730023	237730023	C	T	snp	exonic	RYR2	nonsynonymous SNV	rs779640835			1.79E-05		2221	2	2219	0.000900495
chr14	105517746	105517746	G	A	snp	exonic	GPR132	nonsynonymous SNV	rs751669354			8.96E-06		2220	2	2218	0.000900901
chr2	121107327	121107327	G	A	snp	exonic	INHBB	synonymous SNV	rs767417746			2.70E-05	0	2220	2	2218	0.000900901
chr6	39869132	39869132	G	A	snp	exonic	DAAM2	nonsynonymous SNV	rs370518716			0.0003	0.0002	2219	2	2217	0.000901307
chr11	67376042	67376042	C	T	snp	exonic	NDUFV1	stopgain	rs768050261	Pathogenic	Mitochondrial_complex_I_deficiency	4.48E-05		2219	2	2217	0.000901307
chr19	38572833	38572833	G	A	snp	exonic	SIPA1L3	nonsynonymous SNV	rs780595342			9.68E-06		2219	2	2217	0.000901307
chr16	31092370	31092370	C	T	snp	exonic	ZNF646	synonymous SNV	rs753864793			0		2218	2	2216	0.000901713
chr14	64921542	64921542	C	T	snp	exonic	MTHFD1	synonymous SNV	rs763646367			8.96E-06		2219	2	2216	0.000901713
chr19	39379824	39379824	C	T	snp	intronic	SIRT2		rs199636127			1.81E-05		2217	2	2215	0.00090212
chr17	51901106	51901106	G	A	snp	exonic	KIF2B	nonsynonymous SNV	rs754789047			1.79E-05		2216	2	2214	0.000902527
chr17	73126854	73126854	C	G	snp	exonic	NT5C	nonsynonymous SNV	rs780900232					2215	2	2213	0.000902935
chr9	140611243	140611243	G	A	snp	exonic	EHMT1	nonsynonymous SNV	rs142887098	Likely benign	Chromosome_9q_deletion_syndrome	0.0009	0.0009	2214	2	2212	0.000903342
chr11	205435	205435	G	A	snp	exonic	BET1L	nonsynonymous SNV	rs377434337					2214	2	2212	0.000903342
chr9	34371826	34371826	G	A	snp	exonic	KIAA1161	unknown	rs773122688			8.95E-06		2214	2	2212	0.000903342
chr16	83999219	83999219	G	A	snp	exonic	OSGIN1	synonymous SNV	rs781705166			0		2214	2	2212	0.000903342
chr21	47545973	47545973	C	T	snp	exonic	COL6A2	synonymous SNV	rs201426778	Uncertain significance	not_specified	3.59E-05	0	2212	2	2210	0.000904159
chr9	712966	712966	C	T	snp	exonic	KANK1	nonsynonymous SNV	rs375662630			8.95E-06	0	2212	2	2210	0.000904159
chr3	141497367	141497367	C	T	snp	exonic	GRK7	nonsynonymous SNV	rs554482696			9.08E-06		2212	2	2210	0.000904159
chr11	2424323	2424323	G	A	snp	exonic	TSSC4	nonsynonymous SNV	rs763464142			0	0	2212	2	2210	0.000904159
chr9	140086702	140086702	G	A	snp	intronic	TPRN		rs771401914	Uncertain significance	not_specified	9.00E-06		2212	2	2210	0.000904159
chr4	111539581	111539581	C	T	snp	exonic	PITX2	synonymous SNV	rs140541021			2.69E-05		2211	2	2209	0.000904568
chr7	100676326	100676326	C	A	snp	exonic	MUC17	synonymous SNV	rs555384497					2211	2	2209	0.000904568
chr20	35444122	35444122	C	T	snp	exonic	SOGA1	nonsynonymous SNV	rs752044636			0		2211	2	2209	0.000904568
chr7	100676252	100676252	A	G	snp	exonic	MUC17	nonsynonymous SNV	rs754972314			2.69E-05		2211	2	2209	0.000904568
chr6	292565	292565	C	T	snp	intronic	DUSP22		rs760464992			0		2211	2	2209	0.000904568
chr1	21936683	21936683	G	A	snp	exonic	RAP1GAP	nonsynonymous SNV	rs376034636			8.96E-06		2210	2	2208	0.000904977
chr7	50468135	50468135	A	G	snp	exonic	IKZF1	nonsynonymous SNV	rs772036757			9.00E-06		2211	2	2208	0.000904977
chr9	34371886	34371886	G	A	snp	exonic	KIAA1161	unknown	rs371982066			0		2209	2	2207	0.000905387
chr8	139833540	139833540	G	A	snp	exonic	COL22A1	nonsynonymous SNV	rs752684928			8.96E-06		2209	2	2207	0.000905387
chr16	2815589	2815589	G	A	snp	exonic	SRRM2	nonsynonymous SNV	rs768244831			7.17E-05		2209	2	2207	0.000905387
chr3	195512358	195512358	C	T	snp	exonic	MUC4	synonymous SNV	rs114202241			0.0003	0.0001	2208	2	2206	0.000905797
chr11	6007321	6007321	G	A	snp	exonic	OR52L1	synonymous SNV	rs560678352			4.48E-05		2208	2	2206	0.000905797
chr3	195513051	195513051	C	T	snp	exonic	MUC4	synonymous SNV	rs760135036			0.0003	0.0003	2208	2	2206	0.000905797
chr3	48716495	48716495	G	A	snp	exonic	NCKIPSD	synonymous SNV	rs779730285			8.96E-06		2208	2	2206	0.000905797
chr3	195512915	195512915	G	T	snp	exonic	MUC4	nonsynonymous SNV	rs761403837			6.66E-05	7.08E-05	2207	2	2205	0.000906208
chr22	50280144	50280144	G	A	snp	exonic	ZBED4	nonsynonymous SNV	rs145947648			0		2206	2	2204	0.000906618
chr14	77492915	77492915	G	A	snp	exonic	IRF2BPL	synonymous SNV	rs746802558			0		2205	2	2203	0.000907029
chr1	110883617	110883617	A	C	snp	exonic	RBM15	nonsynonymous SNV	rs769946855			8.95E-06		2205	2	2203	0.000907029
chr2	121107323	121107323	G	T	snp	exonic	INHBB	nonsynonymous SNV	rs770518408			0		2205	2	2203	0.000907029
chr9	712967	712967	G	A	snp	exonic	KANK1	nonsynonymous SNV	rs368541566			8.95E-06	0	2204	2	2202	0.000907441
chr19	54649561	54649561	C	T	snp	intronic	CNOT3		rs191843066			0		2205	2	2202	0.000907441
chr14	105517739	105517739	G	A	snp	exonic	GPR132	synonymous SNV	rs754718487			1.79E-05		2203	2	2201	0.000907853
chr1	6697389	6697389	C	T	snp	exonic	DNAJC11	nonsynonymous SNV	rs573944451			8.95E-06		2202	2	2200	0.000908265
chr10	95720844	95720844	G	A	snp	ncRNA_exonic	PIPSL		rs756748645			0		2201	2	2199	0.000908678
chr11	67376043	67376043	G	A	snp	exonic	NDUFV1	nonsynonymous SNV	rs759006354			1.79E-05		2201	2	2199	0.000908678
chr19	14829756	14829756	C	T	snp	exonic	ZNF333	synonymous SNV	rs142933961			6.28E-05	0	2200	2	2198	0.000909091
chr15	78923451	78923451	C	T	snp	exonic	CHRNB4	nonsynonymous SNV	rs149832833			0	0	2200	2	2198	0.000909091
chr22	50546743	50546743	C	T	snp	intronic	MOV10L1		rs774137159			3.08E-05		2200	2	2198	0.000909091
chr10	49998904	49998904	C	T	snp	exonic	WDFY4	nonsynonymous SNV	rs143976297			0.0004	0.0003	2199	2	2197	0.000909504
chr3	122003814	122003814	G	T	snp	exonic	CASR	nonsynonymous SNV	rs201990892					2199	2	2197	0.000909504
chr4	6303891	6303891	C	T	snp	exonic	WFS1	nonsynonymous SNV	rs369107336	Pathogenic\x2cLikely benign\x2cUncertain significance	Wolfram_syndrome\x2cnot_specified\x2cnot_specified	0.0001	0.0003	2199	2	2197	0.000909504
chr7	128845086	128845086	G	A	snp	exonic	SMO	nonsynonymous SNV	rs761395599			2.69E-05		2199	2	2197	0.000909504
chr10	7621816	7621816	G	A	snp	exonic	ITIH5	synonymous SNV	rs112770949			8.95E-05	6.66E-05	2198	2	2196	0.000909918
chr19	55715287	55715287	C	A	snp	exonic	PTPRH	nonsynonymous SNV	rs747500990			0	0	2198	2	2196	0.000909918
chr7	50468104	50468104	G	A	snp	exonic	IKZF1	nonsynonymous SNV	rs754054403			9.03E-06		2198	2	2196	0.000909918
chr17	74288806	74288806	G	A	snp	exonic	QRICH2	nonsynonymous SNV	rs762002477			0		2198	2	2196	0.000909918
chr9	35398996	35398996	C	T	snp	exonic	UNC13B	synonymous SNV	rs774007178			2.69E-05	0	2198	2	2196	0.000909918
chr11	2424340	2424340	C	T	snp	exonic	TSSC4	synonymous SNV	rs780607900			0	6.68E-05	2198	2	2196	0.000909918
chr1	155629614	155629614	C	T	snp	exonic	YY1AP1	nonsynonymous SNV	rs199876978			8.95E-05	0.0002	2199	2	2196	0.000909918
chr3	49866640	49866640	G	A	snp	exonic	TRAIP	nonsynonymous SNV	rs536675100			8.97E-06		2197	2	2195	0.000910332
chr1	212799309	212799309	C	T	snp	exonic	FAM71A	stopgain	rs753422133			2.71E-05		2197	2	2195	0.000910332
chr8	139833569	139833569	C	T	snp	exonic	COL22A1	nonsynonymous SNV	rs145361557			0.0007	0.0008	2196	2	2194	0.000910747
chr15	90451554	90451554	C	T	snp	exonic	ARPIN;C15orf38-AP3S2	nonsynonymous SNV	rs755299674			0		2196	2	2194	0.000910747
chr12	57623480	57623480	G	A	snp	UTR5	SHMT2		rs767722207			0		2196	2	2194	0.000910747
chr21	38593656	38593656	G	A	snp	ncRNA_exonic	DSCR9		rs775518466			0	6.67E-05	2196	2	2194	0.000910747
chr3	101540676	101540676	C	T	snp	exonic	NXPE3	nonsynonymous SNV	rs776725208			0		2197	2	2194	0.000910747
chr21	46321485	46321485	G	A	snp	exonic	ITGB2	synonymous SNV	rs552709121			6.27E-05	6.67E-05	2195	2	2193	0.000911162
chr17	74289736	74289736	G	A	snp	exonic	QRICH2	nonsynonymous SNV	rs758080262			3.58E-05		2195	2	2193	0.000911162
chr19	9071425	9071425	A	G	snp	exonic	MUC16	nonsynonymous SNV	rs75995651			0		2195	2	2193	0.000911162
chr19	14829773	14829773	G	A	snp	exonic	ZNF333	nonsynonymous SNV	rs778621696			0		2195	2	2193	0.000911162
chr19	9046762	9046762	G	A	snp	exonic	MUC16	synonymous SNV	rs774497645			2.69E-05		2194	2	2192	0.000911577
chr1	152283404	152283404	C	T	snp	exonic	FLG	nonsynonymous SNV	rs201488863			8.95E-06	0	2193	2	2191	0.000911993
chr12	120884136	120884136	C	T	snp	exonic	TRIAP1	nonsynonymous SNV	rs368215298			0	0	2193	2	2191	0.000911993
chr10	15255528	15255528	G	A	snp	exonic	FAM171A1	nonsynonymous SNV	rs770790741			8.96E-06		2193	2	2191	0.000911993
chr17	46136854	46136854	C	T	snp	exonic	NFE2L1	nonsynonymous SNV	rs780333699			6.27E-05	6.67E-05	2193	2	2191	0.000911993
chr3	46062678	46062678	C	A	snp	exonic	XCR1	nonsynonymous SNV	rs200700108			8.06E-05	0.0003	2192	2	2190	0.000912409
chr17	56621291	56621291	C	T	snp	exonic	C17orf47	nonsynonymous SNV	rs370660253			6.27E-05	0	2191	2	2189	0.000912825
chr19	56538625	56538625	C	T	snp	exonic	NLRP5	synonymous SNV	rs376967741			6.28E-05		2191	2	2189	0.000912825
chr16	1813713	1813713	C	T	snp	exonic	MAPK8IP3	nonsynonymous SNV	rs753108871			0		2191	2	2189	0.000912825
chr2	220421367	220421367	T	C	snp	exonic	OBSL1	nonsynonymous SNV	rs758559138			0		2191	2	2189	0.000912825
chr10	104595133	104595133	G	A	snp	exonic	CYP17A1	nonsynonymous SNV	rs139936404			8.06E-05		2190	2	2188	0.000913242
chr19	36128235	36128235	C	T	snp	exonic	RBM42	synonymous SNV	rs143700030			0.0018	0.0011	2190	2	2188	0.000913242
chr19	42819242	42819242	G	A	snp	intronic	TMEM145		rs767461398			0		2190	2	2188	0.000913242
chr10	5567320	5567320	G	A	snp	exonic	CALML3	nonsynonymous SNV	rs776439000			8.97E-06		2190	2	2188	0.000913242
chr19	39379810	39379810	G	A	snp	intronic	SIRT2		rs200545932			0		2189	2	2187	0.000913659
chr16	1257737	1257737	C	T	snp	intronic	CACNA1H		rs375428557			6.86E-05	0.0001	2189	2	2187	0.000913659
chr15	65489738	65489738	C	A	snp	exonic	CILP	synonymous SNV	rs531290271			0		2189	2	2187	0.000913659
chr8	2092695	2092695	G	A	snp	exonic	MYOM2	synonymous SNV	rs750939896					2189	2	2187	0.000913659
chr5	156816337	156816337	C	A	snp	exonic	CYFIP2	synonymous SNV	rs769817015			8.97E-06		2189	2	2187	0.000913659
chr17	39919367	39919367	G	A	snp	exonic	JUP	synonymous SNV	rs77375949	other	not_specified	0.0001	6.67E-05	2189	2	2187	0.000913659
chr7	73535232	73535232	G	A	snp	exonic	LIMK1	nonsynonymous SNV	rs782125431			3.59E-05	0.0013	2189	2	2187	0.000913659
chr16	72137560	72137560	C	T	snp	exonic	DHX38	nonsynonymous SNV	rs367927748			3.58E-05		2188	2	2186	0.000914077
chr22	38084815	38084815	T	C	snp	intronic	NOL12		rs748575117			9.02E-06		2188	2	2186	0.000914077
chr12	57559697	57559697	G	A	snp	exonic	LRP1	synonymous SNV	rs752773323			0		2188	2	2186	0.000914077
chr17	29283353	29283353	G	A	snp	exonic	ADAP2	stopgain	rs867691221					2188	2	2186	0.000914077
chr3	155199947	155199947	C	T	snp	exonic	PLCH1	nonsynonymous SNV	rs761926932			0		2187	2	2185	0.000914495
chr1	23520463	23520463	C	T	snp	exonic	HTR1D	nonsynonymous SNV	rs776988667			1.79E-05		2187	2	2185	0.000914495
chr9	140611261	140611261	G	T	snp	exonic	EHMT1	nonsynonymous SNV	rs766886089			1.79E-05		2188	2	2185	0.000914495
chr3	30713619	30713619	C	T	snp	exonic	TGFBR2	nonsynonymous SNV	rs34833812	Pathogenic|other|Likely benign|Likely benign|Likely benign	Hereditary_nonpolyposis_colorectal_cancer_type_6|Thoracic_aortic_aneurysm_and_aortic_dissection|Loeys-Dietz_syndrome|Marfan_syndrome|not_specified	1.80E-05	0	2186	2	2184	0.000914913
chr17	46136871	46136871	C	T	snp	exonic	NFE2L1	synonymous SNV	rs538008004			0		2186	2	2184	0.000914913
chr1	228473899	228473899	A	G	snp	exonic	OBSCN	nonsynonymous SNV	rs764090114			8.98E-06		2186	2	2184	0.000914913
chr20	49575003	49575003	G	T	snp	exonic	DPM1	nonsynonymous SNV	rs770339761			8.95E-06		2186	2	2184	0.000914913
chr3	136045951	136045951	C	A	snp	intronic	PCCB		rs754489147			8.46E-05		2185	2	2183	0.000915332
chr19	7964099	7964099	C	T	snp	exonic	LRRC8E	nonsynonymous SNV	rs201612266			8.96E-06		2186	2	2183	0.000915332
chr13	113803376	113803376	G	A	snp	exonic	F10	nonsynonymous SNV	rs121964947			8.96E-06	6.67E-05	2184	2	2182	0.000915751
chr22	38823568	38823568	G	A	snp	exonic	KCNJ4	synonymous SNV	rs540270406			2.70E-05		2184	2	2182	0.000915751
chr1	160012144	160012144	A	G	snp	exonic	KCNJ10	nonsynonymous SNV	rs759993423	Uncertain significance	not_specified	1.80E-05		2184	2	2182	0.000915751
chr16	20357567	20357567	C	T	snp	exonic	UMOD	nonsynonymous SNV	rs767780614			8.96E-06	6.66E-05	2184	2	2182	0.000915751
chr1	176564332	176564332	A	G	snp	exonic	PAPPA2	nonsynonymous SNV	rs756074872			8.96E-06		2185	2	2182	0.000915751
chr3	128181905	128181905	G	A	snp	exonic	DNAJB8	nonsynonymous SNV	rs143882241			8.06E-05	0.0002	2183	2	2181	0.00091617
chr2	27454972	27454972	G	A	snp	exonic	CAD	nonsynonymous SNV	rs199908899			0.0001	0	2183	2	2181	0.00091617
chr15	75340973	75340973	C	T	snp	exonic	PPCDC	nonsynonymous SNV	rs757043560			3.58E-05	0.0002	2183	2	2181	0.00091617
chr3	47043885	47043885	G	A	snp	exonic	NBEAL2	nonsynonymous SNV	rs775920047			8.96E-06		2183	2	2181	0.00091617
chr6	44223107	44223107	T	C	snp	exonic	SLC35B2	nonsynonymous SNV	rs142339274			8.96E-06		2182	2	2180	0.00091659
chr9	131761972	131761972	C	T	snp	exonic	NUP188	nonsynonymous SNV	rs762094340			0	0	2182	2	2180	0.00091659
chr8	145998755	145998755	C	T	snp	exonic	ZNF34	nonsynonymous SNV	rs772027364			3.58E-05	6.66E-05	2182	2	2180	0.00091659
chr10	99225685	99225685	C	T	snp	exonic	MMS19	nonsynonymous SNV	rs776952844			0		2182	2	2180	0.00091659
chr12	123187858	123187858	G	A	snp	UTR5	HCAR2		rs199713408			0.0001	0	2183	2	2180	0.00091659
chr1	152191774	152191774	G	A	snp	exonic	HRNR	synonymous SNV	rs140223455			0	0	2181	2	2179	0.000917011
chr16	31092389	31092389	G	A	snp	exonic	ZNF646	nonsynonymous SNV	rs746511789			0		2181	2	2179	0.000917011
chr2	219029532	219029532	G	A	snp	exonic	CXCR1	nonsynonymous SNV	rs759533521			8.96E-06	0	2181	2	2179	0.000917011
chr1	152279804	152279804	C	T	snp	exonic	FLG	nonsynonymous SNV	rs866141505					2181	2	2179	0.000917011
chr19	10335204	10335204	G	A	snp	exonic	S1PR2	synonymous SNV	rs756303739			8.99E-06		2180	2	2178	0.000917431
chr22	26706727	26706727	G	A	snp	exonic	SEZ6L	nonsynonymous SNV	rs765777882			8.96E-06		2180	2	2178	0.000917431
chr16	66956059	66956059	C	G	snp	exonic	RRAD	nonsynonymous SNV	rs150765557			0.0001	0	2179	2	2177	0.000917852
chr19	46733634	46733634	G	T	snp	exonic	IGFL1	synonymous SNV	rs752917913			0		2179	2	2177	0.000917852
chr7	97822844	97822844	C	T	snp	exonic	LMTK2	nonsynonymous SNV	rs756868056			8.95E-06		2179	2	2177	0.000917852
chr11	65308040	65308040	C	T	snp	exonic	LTBP3	nonsynonymous SNV	rs773791660			8.98E-06		2179	2	2177	0.000917852
chr5	140307519	140307519	C	T	snp	exonic	PCDHAC1	nonsynonymous SNV	rs375068654					2180	2	2177	0.000917852
chr3	30713601	30713601	C	T	snp	exonic	TGFBR2	nonsynonymous SNV	rs202168735			1.80E-05		2178	2	2176	0.000918274
chr4	39448789	39448789	A	G	snp	exonic	KLB	nonsynonymous SNV	rs145447046			0.0014	0.0011	2177	2	2175	0.000918695
chr3	49049631	49049631	G	A	snp	exonic	WDR6	nonsynonymous SNV	rs563960105			0		2177	2	2175	0.000918695
chr3	138739183	138739183	G	A	snp	exonic	PRR23B	synonymous SNV	rs113420873			0.0001	0	2178	2	2175	0.000918695
chr13	113803327	113803327	C	T	snp	exonic	F10	nonsynonymous SNV	rs148209958			2.69E-05	0	2176	2	2174	0.000919118
chr1	33613132	33613132	C	T	snp	exonic	TRIM62	synonymous SNV	rs376832946			4.49E-05	0	2176	2	2174	0.000919118
chr22	26829921	26829921	G	A	snp	exonic	ASPHD2	nonsynonymous SNV	rs777470635			1.80E-05		2176	2	2174	0.000919118
chr19	9059934	9059934	G	A	snp	exonic	MUC16	nonsynonymous SNV	rs375432429			8.99E-06	0	2177	2	2174	0.000919118
chr14	103969403	103969403	G	A	snp	exonic	MARK3	nonsynonymous SNV	rs752727889			3.58E-05	6.66E-05	2175	2	2173	0.00091954
chr1	43124551	43124551	G	A	snp	exonic	PPIH	nonsynonymous SNV	rs768003546					2175	2	2173	0.00091954
chr16	70190722	70190722	C	T	snp	exonic	PDPR	synonymous SNV	rs377171647			0	0	2176	2	2173	0.00091954
chr9	35077040	35077040	C	T	snp	exonic	FANCG	synonymous SNV	rs148910563			5.37E-05	6.67E-05	2174	2	2172	0.000919963
chr17	79389773	79389773	C	T	snp	intronic	BAHCC1		rs541963635				0.0002	2174	2	2172	0.000919963
chr17	19186589	19186589	T	C	snp	exonic	EPN2	nonsynonymous SNV	rs755093157			8.95E-06		2174	2	2172	0.000919963
chr3	52558162	52558162	C	T	snp	exonic	STAB1	nonsynonymous SNV	rs766033396			0		2174	2	2172	0.000919963
chr1	155014267	155014267	G	A	snp	exonic	DCST1	nonsynonymous SNV	rs376822663			8.95E-06	6.67E-05	2173	2	2171	0.000920387
chr8	139833563	139833563	G	A	snp	exonic	COL22A1	nonsynonymous SNV	rs780501445			0		2173	2	2171	0.000920387
chr20	33872238	33872238	T	C	snp	exonic	EIF6	nonsynonymous SNV	rs143234154			0.0001	6.68E-05	2171	2	2169	0.000921234
chr9	712907	712907	C	T	snp	exonic	KANK1	nonsynonymous SNV	rs199666686			8.96E-06		2171	2	2169	0.000921234
chr3	52283166	52283166	A	G	snp	intronic	PPM1M		rs750067788			9.01E-06		2171	2	2169	0.000921234
chr1	27277937	27277937	C	T	snp	exonic	KDF1	nonsynonymous SNV	rs755094201			1.80E-05	6.67E-05	2171	2	2169	0.000921234
chr15	43821613	43821613	C	T	snp	exonic	MAP1A	nonsynonymous SNV	rs758664345			8.99E-06		2171	2	2169	0.000921234
chr13	26620851	26620851	G	T	snp	exonic	SHISA2	nonsynonymous SNV	rs774547805			0		2171	2	2169	0.000921234
chr3	48508706	48508706	T	C	snp	exonic	TREX1	nonsynonymous SNV	rs763647255			8.98E-06		2170	2	2168	0.000921659
chr3	49168498	49168498	C	T	snp	exonic	LAMB2	nonsynonymous SNV	rs772368832			0	0.0003	2170	2	2168	0.000921659
chr2	220421245	220421245	G	T	snp	exonic	OBSL1	nonsynonymous SNV	rs766846281			8.96E-06		2169	2	2167	0.000922084
chr11	13032422	13032422	G	A	snp	exonic	RASSF10	synonymous SNV	rs752359490			0		2167	2	2165	0.000922935
chr12	53663077	53663077	A	C	snp	exonic	ESPL1	synonymous SNV	rs530797873			0	0	2166	2	2164	0.000923361
chr1	46489620	46489620	G	A	snp	exonic	MAST2	nonsynonymous SNV	rs765230688			6.27E-05	0	2166	2	2164	0.000923361
chr3	128181912	128181912	G	A	snp	exonic	DNAJB8	synonymous SNV	rs769956876			8.96E-06	0	2166	2	2164	0.000923361
chr19	2790491	2790491	C	T	snp	exonic	THOP1	nonsynonymous SNV	rs768045466			0		2167	2	2164	0.000923361
chr11	6078715	6078715	C	T	snp	intergenic	OR56A1;OR56B4		rs556286683					2165	2	2163	0.000923788
chr15	90451562	90451562	T	C	snp	exonic	ARPIN;C15orf38-AP3S2	nonsynonymous SNV	rs748386428			8.95E-06		2165	2	2163	0.000923788
chr16	2816172	2816172	C	T	snp	exonic	SRRM2	synonymous SNV	rs771577866					2165	2	2163	0.000923788
chr6	160499260	160499260	G	A	snp	exonic	IGF2R	nonsynonymous SNV	rs142698228			0	0	2164	2	2162	0.000924214
chr5	131607666	131607666	G	A	snp	intronic	PDLIM4		rs369515169					2164	2	2162	0.000924214
chr19	46733629	46733629	G	A	snp	exonic	IGFL1	nonsynonymous SNV	rs373596301			4.48E-05	6.67E-05	2164	2	2162	0.000924214
chr11	128781284	128781284	G	A	snp	exonic	KCNJ5	nonsynonymous SNV	rs560269341			1.79E-05	0	2164	2	2162	0.000924214
chr19	31769926	31769926	C	T	snp	exonic	TSHZ3	nonsynonymous SNV	rs754959706			8.97E-06		2164	2	2162	0.000924214
chr4	7435618	7435618	G	A	snp	exonic	PSAPL1	nonsynonymous SNV	rs764480238			2.69E-05		2163	2	2161	0.000924642
chr12	120117747	120117747	G	A	snp	exonic	PRKAB1	nonsynonymous SNV	rs764667443			0		2163	2	2161	0.000924642
chr22	38823946	38823946	C	T	snp	exonic	KCNJ4	synonymous SNV	rs764790753			1.80E-05		2163	2	2161	0.000924642
chr6	39283119	39283119	C	T	snp	exonic	KCNK16	synonymous SNV	rs775274420			0		2163	2	2161	0.000924642
chr17	4858564	4858564	C	A	snp	exonic	ENO3	nonsynonymous SNV	rs373847361			0	0	2162	2	2160	0.000925069
chr15	68118924	68118924	A	G	snp	exonic	SKOR1	nonsynonymous SNV	rs563780484					2162	2	2160	0.000925069
chr6	28195785	28195785	G	A	snp	intronic	ZSCAN9		rs757318916			4.36E-05		2162	2	2160	0.000925069
chr20	33872152	33872152	C	T	snp	exonic	EIF6	nonsynonymous SNV	rs774680617			9.20E-06		2162	2	2160	0.000925069
chr19	19603183	19603183	C	T	snp	exonic	GATAD2A	nonsynonymous SNV	rs775354795			0		2162	2	2160	0.000925069
chr7	100676428	100676428	C	T	snp	exonic	MUC17	synonymous SNV	rs778465093			8.96E-06		2161	2	2159	0.000925497
chr5	140012445	140012445	G	A	snp	exonic	CD14	stopgain	rs763569531			8.95E-06		2160	2	2158	0.000925926
chr9	131761944	131761944	T	C	snp	exonic	NUP188	nonsynonymous SNV	rs770613229			3.58E-05		2160	2	2158	0.000925926
chr15	74637425	74637425	C	T	snp	exonic	CYP11A1	synonymous SNV	rs771665524			1.79E-05		2160	2	2158	0.000925926
chr19	57133460	57133460	C	T	snp	exonic	ZNF71	nonsynonymous SNV	rs772212199			0		2160	2	2158	0.000925926
chr8	88885666	88885666	G	A	snp	exonic	DCAF4L2	synonymous SNV	rs780303419			3.58E-05	6.66E-05	2160	2	2158	0.000925926
chr21	47552293	47552293	T	A	snp	exonic	COL6A2	nonsynonymous SNV	rs771847588			9.12E-06		2159	2	2157	0.000926355
chr19	10677987	10677987	C	T	snp	exonic	CDKN2D	nonsynonymous SNV	rs868167883					2159	2	2157	0.000926355
chr9	91616573	91616573	G	A	snp	exonic	S1PR3	nonsynonymous SNV	rs117829798			0.0043	0.0033	2158	2	2156	0.000926784
chr2	37035793	37035793	C	G	snp	exonic	VIT	nonsynonymous SNV	rs182729056			0		2158	2	2156	0.000926784
chr16	2136247	2136247	G	A	snp	exonic	TSC2	synonymous SNV	rs369346726	Likely benign\x2cLikely benign	Tuberous_sclerosis_2\x2cTuberous_sclerosis_2	2.70E-05	0	2158	2	2156	0.000926784
chr19	56538496	56538496	C	T	snp	exonic	NLRP5	synonymous SNV	rs45596339			0.0002	6.67E-05	2158	2	2156	0.000926784
chr2	119988552	119988552	G	A	snp	UTR5	STEAP3		rs536294053			0		2158	2	2156	0.000926784
chr3	141497316	141497316	C	T	snp	exonic	GRK7	nonsynonymous SNV	rs761814269			9.12E-06		2158	2	2156	0.000926784
chr19	10335411	10335411	C	T	snp	exonic	S1PR2	synonymous SNV	rs764211253			3.58E-05	6.67E-05	2158	2	2156	0.000926784
chr3	49694772	49694772	C	T	snp	exonic	BSN	nonsynonymous SNV	rs138054763			4.49E-05	0.0001	2157	2	2155	0.000927214
chr17	39919360	39919360	C	T	snp	exonic	JUP	nonsynonymous SNV	rs139559495			6.27E-05	6.67E-05	2157	2	2155	0.000927214
chr6	44223124	44223124	G	A	snp	exonic	SLC35B2	synonymous SNV	rs76048013			8.96E-06	0	2157	2	2155	0.000927214
chr2	241404114	241404114	C	A	snp	exonic	GPC1	nonsynonymous SNV	rs138916099			9.13E-06		2156	2	2154	0.000927644
chr6	43475057	43475057	G	A	snp	intronic	LRRC73		rs373145688			9.09E-06	6.67E-05	2156	2	2154	0.000927644
chr5	140856611	140856611	C	T	snp	exonic	PCDHGC3	synonymous SNV	rs750525889			8.95E-06		2156	2	2154	0.000927644
chr7	97823650	97823650	C	T	snp	exonic	LMTK2	synonymous SNV	rs756265244			1.79E-05		2156	2	2154	0.000927644
chr11	65273053	65273053	C	T	snp	ncRNA_exonic	MALAT1;TALAM1		rs759718925			9.35E-06		2156	2	2154	0.000927644
chr1	154543838	154543838	G	A	snp	exonic	CHRNB2	nonsynonymous SNV	rs768297928			0		2156	2	2154	0.000927644
chr1	154543811	154543811	T	C	snp	exonic	CHRNB2	nonsynonymous SNV	rs868409663					2156	2	2154	0.000927644
chr11	6661869	6661869	G	A	snp	exonic	DCHS1	nonsynonymous SNV	rs572329375			2.69E-05		2157	2	2154	0.000927644
chr22	19119166	19119166	G	A	snp	exonic	TSSK2	nonsynonymous SNV	rs375895308			1.80E-05	6.68E-05	3233	3	3230	0.000927931
chr3	49052604	49052604	C	T	snp	exonic	WDR6	synonymous SNV	rs776572449			9.13E-06		2155	2	2153	0.000928074
chr19	40433617	40433617	T	C	snp	exonic	FCGBP	nonsynonymous SNV	rs867102808			0		2155	2	2153	0.000928074
chr9	711478	711478	T	C	snp	exonic	KANK1	nonsynonymous SNV	rs765875164			0		2154	2	2152	0.000928505
chr6	11103925	11103925	C	T	snp	UTR3	ERVFRD-1		rs776985820					2154	2	2152	0.000928505
chr1	33613159	33613159	G	A	snp	exonic	TRIM62	synonymous SNV	rs779623643			8.96E-06		2154	2	2152	0.000928505
chr17	4858733	4858733	G	A	snp	exonic	ENO3	synonymous SNV	rs745882984			0		2153	2	2151	0.000928936
chr1	230846332	230846332	C	A	snp	exonic	AGT	nonsynonymous SNV	rs748818704			8.95E-06		2153	2	2151	0.000928936
chr2	96949394	96949394	G	A	snp	exonic	SNRNP200	nonsynonymous SNV	rs200736296					2152	2	2150	0.000929368
chr1	228473880	228473880	G	A	snp	exonic	OBSCN	nonsynonymous SNV	rs374150114					2151	2	2149	0.0009298
chr17	39919361	39919361	G	A	snp	exonic	JUP	synonymous SNV	rs531692563	Likely benign	not_specified	8.96E-06		2151	2	2149	0.0009298
chr17	48614079	48614079	C	T	snp	exonic	EPN3	synonymous SNV	rs754441258			0		2151	2	2149	0.0009298
chr12	7188081	7188081	G	A	snp	exonic	C1R	unknown	rs766897948					2151	2	2149	0.0009298
chr1	3328580	3328580	G	A	snp	exonic	PRDM16	nonsynonymous SNV	rs773704725			8.99E-06		2151	2	2149	0.0009298
chr8	139833576	139833576	C	T	snp	exonic	COL22A1	nonsynonymous SNV	rs774384516			0		2151	2	2149	0.0009298
chr3	186953694	186953694	G	A	snp	exonic	MASP1	synonymous SNV	rs150583270			8.97E-06		2150	2	2148	0.000930233
chr12	7188080	7188080	C	T	snp	exonic	C1R	unknown	rs745821919			0		2150	2	2148	0.000930233
chr16	66956048	66956048	T	C	snp	exonic	RRAD	synonymous SNV	rs765000777					2150	2	2148	0.000930233
chr10	50946089	50946089	C	A	snp	exonic	OGDHL	nonsynonymous SNV	rs778624748			1.79E-05		2150	2	2148	0.000930233
chr19	10335163	10335163	T	C	snp	exonic	S1PR2	nonsynonymous SNV	rs869312750	Pathogenic	Deafness\x2c_autosomal_recessive_68			2150	2	2148	0.000930233
chr16	2816210	2816210	C	T	snp	exonic	SRRM2	nonsynonymous SNV	rs751683436			8.96E-06	6.66E-05	2149	2	2147	0.000930665
chr9	38396125	38396125	A	G	snp	exonic	ALDH1B1	nonsynonymous SNV	rs777636836			8.96E-06		2149	2	2147	0.000930665
chr17	18144846	18144846	C	T	snp	exonic	LLGL1	synonymous SNV	rs113113427				0	2148	2	2146	0.000931099
chr11	73022714	73022714	A	G	snp	exonic	ARHGEF17	nonsynonymous SNV	rs189231711			8.97E-06		2148	2	2146	0.000931099
chr21	35821674	35821674	A	G	snp	exonic	KCNE1;KCNE1B	nonsynonymous SNV	rs199473361	not provided	Congenital_long_QT_syndrome			2148	2	2146	0.000931099
chr11	72539819	72539819	C	A	snp	exonic	ATG16L2	nonsynonymous SNV	rs565192203			8.96E-06		2148	2	2146	0.000931099
chr3	58516365	58516365	C	A	snp	exonic	ACOX2	nonsynonymous SNV	rs769214024			9.05E-06		2148	2	2146	0.000931099
chr16	837592	837592	G	A	snp	exonic	RPUSD1	nonsynonymous SNV	rs777363103			2.72E-05		2148	2	2146	0.000931099
chr14	107170017	107170017	T	C	snp	intergenic	MIR7641-2;MIR5195		rs374017972			1.83E-05		2147	2	2145	0.000931532
chr17	650766	650766	G	T	snp	exonic	GEMIN4	nonsynonymous SNV	rs767170857			4.48E-05	0	2147	2	2145	0.000931532
chr2	220246744	220246744	T	C	snp	exonic	DNPEP	nonsynonymous SNV	rs774878328			0		2147	2	2145	0.000931532
chr16	2816216	2816216	G	T	snp	exonic	SRRM2	nonsynonymous SNV	rs377365466			0	0	2146	2	2144	0.000931966
chr3	49051557	49051557	A	G	snp	intronic	WDR6		rs746412492			0		2146	2	2144	0.000931966
chr9	35399201	35399201	C	T	snp	exonic	UNC13B	nonsynonymous SNV	rs756560330			8.95E-06	0	2146	2	2144	0.000931966
chr3	52522221	52522221	G	A	snp	exonic	NISCH	nonsynonymous SNV	rs372469950			2.70E-05	6.68E-05	2145	2	2143	0.000932401
chr11	66372790	66372790	C	T	snp	intronic	CCS		rs756484980			0		2145	2	2143	0.000932401
chr19	16620757	16620757	G	A	snp	exonic	C19orf44	nonsynonymous SNV	rs760109719			8.95E-06		2145	2	2143	0.000932401
chr19	9271911	9271911	C	T	snp	exonic	ZNF317	synonymous SNV	rs761613430			1.79E-05	6.67E-05	2145	2	2143	0.000932401
chr11	6588220	6588220	C	T	snp	exonic	DNHD1	synonymous SNV	rs748068590			0		2143	2	2141	0.000933271
chr5	169310443	169310443	C	T	snp	exonic	FAM196B	nonsynonymous SNV	rs754722504			0		2143	2	2141	0.000933271
chr16	2817240	2817240	G	A	snp	exonic	SRRM2	synonymous SNV	rs543223328			8.98E-06		2144	2	2141	0.000933271
chr1	888573	888573	G	A	snp	exonic	NOC2L	synonymous SNV	rs113292586			0		2142	2	2140	0.000933707
chr9	104192079	104192079	G	A	snp	exonic	ALDOB	synonymous SNV	rs549682194			4.50E-05	6.67E-05	2142	2	2140	0.000933707
chr9	91616575	91616575	G	A	snp	exonic	S1PR3	nonsynonymous SNV	rs746160275			2.69E-05		2142	2	2140	0.000933707
chr16	20357621	20357621	C	T	snp	exonic	UMOD	nonsynonymous SNV	rs771734037			8.96E-06		2142	2	2140	0.000933707
chr22	35947785	35947785	C	T	snp	exonic	RASD2	synonymous SNV	rs773156408			0		2142	2	2140	0.000933707
chr21	47552388	47552388	C	T	snp	exonic	COL6A2	synonymous SNV	rs145460820	Likely benign	not_specified	0.0006	0.0017	2141	2	2139	0.000934143
chr19	14829772	14829772	C	T	snp	exonic	ZNF333	nonsynonymous SNV	rs549570934			0	0	2140	2	2138	0.000934579
chr7	48443327	48443327	G	A	snp	exonic	ABCA13	nonsynonymous SNV	rs769840927			2.69E-05		2140	2	2138	0.000934579
chr20	18123369	18123369	C	T	snp	exonic	KAT14	nonsynonymous SNV	rs368748280			8.24E-05	6.66E-05	2139	2	2137	0.000935016
chr4	3449234	3449234	C	T	snp	exonic	HGFAC	synonymous SNV	rs551648317			9.03E-06		2139	2	2137	0.000935016
chr9	138662130	138662130	G	A	snp	intronic	KCNT1		rs754311028			9.85E-06	0	2139	2	2137	0.000935016
chr19	14273860	14273860	G	A	snp	exonic	ADGRL1	synonymous SNV	rs762915128			8.96E-06		2139	2	2137	0.000935016
chr3	184023707	184023707	T	C	snp	exonic	PSMD2	nonsynonymous SNV	rs183802933					2138	2	2136	0.000935454
chr1	18149715	18149715	G	A	snp	exonic	ACTL8	nonsynonymous SNV	rs201038955			2.69E-05		2138	2	2136	0.000935454
chr7	100680525	100680525	T	C	snp	exonic	MUC17	nonsynonymous SNV	rs201855491			0	0	2138	2	2136	0.000935454
chr14	104199383	104199383	G	A	snp	UTR3	ZFYVE21		rs754491974			3.58E-05		2138	2	2136	0.000935454
chr2	241404115	241404115	G	A	snp	exonic	GPC1	synonymous SNV	rs201081083			0	0.0006	2139	2	2136	0.000935454
chr11	65307074	65307074	G	A	snp	exonic	LTBP3	synonymous SNV	rs145046881			5.47E-05	0	2137	2	2135	0.000935891
chr11	2424406	2424406	C	T	snp	exonic	TSSC4	synonymous SNV	rs147679407			0.0002	0.0002	2137	2	2135	0.000935891
chr2	133540466	133540466	G	A	snp	exonic	NCKAP5	synonymous SNV	rs376471685			1.79E-05		2137	2	2135	0.000935891
chr7	100676900	100676900	G	A	snp	exonic	MUC17	nonsynonymous SNV	rs71557221			0	0	2137	2	2135	0.000935891
chrX	2990248	2990248	G	A	snp	intronic	ARSF		rs748028254					2137	2	2135	0.000935891
chr3	13415307	13415307	T	C	snp	exonic	NUP210	nonsynonymous SNV	rs760158312			8.96E-06		2137	2	2135	0.000935891
chr7	99704414	99704414	T	C	snp	exonic	AP4M1	nonsynonymous SNV	rs777120660			0		2137	2	2135	0.000935891
chr19	50957348	50957348	T	A	snp	exonic	MYBPC2	nonsynonymous SNV	rs369339958			8.22E-05	6.71E-05	2136	2	2134	0.00093633
chr16	532473	532473	G	A	snp	intronic	RAB11FIP3		rs542767839				0	2136	2	2134	0.00093633
chr3	136045905	136045905	C	T	snp	intronic	PCCB		rs747804711			9.47E-06		2136	2	2134	0.00093633
chr20	47865411	47865411	G	A	snp	exonic	ZNFX1	nonsynonymous SNV	rs752575926			1.79E-05		2136	2	2134	0.00093633
chr17	41852224	41852224	G	A	snp	exonic	DUSP3	nonsynonymous SNV	rs758652091			8.95E-06		2136	2	2134	0.00093633
chr7	99021560	99021560	G	A	snp	exonic	ATP5J2-PTCD1;PTCD1	synonymous SNV	rs770452742			2.69E-05		2136	2	2134	0.00093633
chr3	53215763	53215763	A	G	snp	intronic	PRKCD		rs781967950					2136	2	2134	0.00093633
chr19	9066044	9066044	C	T	snp	exonic	MUC16	synonymous SNV	rs139774691			0	0	2137	2	2134	0.00093633
chr4	119951813	119951813	C	A	snp	exonic	SYNPO2	nonsynonymous SNV	rs145367728			0	0	2135	2	2133	0.000936768
chr12	112237691	112237691	C	T	snp	ncRNA_exonic	MIR6761		rs200408280			0.0003	0.0015	2135	2	2133	0.000936768
chr1	228554628	228554628	G	A	snp	intronic	OBSCN		rs769021308			0		2135	2	2133	0.000936768
chr4	39448904	39448904	T	C	snp	exonic	KLB	nonsynonymous SNV	rs202129063					2134	2	2132	0.000937207
chr1	176564202	176564202	C	T	snp	exonic	PAPPA2	nonsynonymous SNV	rs539027209			0		2135	2	2132	0.000937207
chr1	3328558	3328558	G	A	snp	exonic	PRDM16	synonymous SNV	rs201769516	Likely benign	not_specified	0.0002	0.0002	2133	2	2131	0.000937647
chr19	9066964	9066964	G	A	snp	exonic	MUC16	nonsynonymous SNV	rs756023278			2.70E-05		2133	2	2131	0.000937647
chr17	41852134	41852134	C	T	snp	exonic	DUSP3	nonsynonymous SNV	rs758918021			8.95E-06		2133	2	2131	0.000937647
chr1	249212468	249212468	G	A	snp	exonic	PGBD2	nonsynonymous SNV	rs760946071			1.82E-05		2133	2	2131	0.000937647
chr1	249212481	249212481	C	T	snp	exonic	PGBD2	synonymous SNV	rs144945119			0	0	2132	2	2130	0.000938086
chr2	234355474	234355474	G	A	snp	intronic	DGKD		rs372957264			1.81E-05		2132	2	2130	0.000938086
chr7	100678427	100678427	G	A	snp	exonic	MUC17	nonsynonymous SNV	rs373200314			2.69E-05	6.67E-05	2132	2	2130	0.000938086
chr16	72139067	72139067	G	A	snp	intronic	DHX38		rs745667422			8.97E-06		2132	2	2130	0.000938086
chr3	48510399	48510399	G	A	snp	UTR3	SHISA5		rs753341240			8.20E-05	0	2132	2	2130	0.000938086
chr22	38565332	38565332	C	T	snp	exonic	PLA2G6	synonymous SNV	rs763513493			1.79E-05		2132	2	2130	0.000938086
chr1	228528470	228528470	C	T	snp	exonic	OBSCN	synonymous SNV	rs765797122			1.87E-05		2132	2	2130	0.000938086
chr9	140611221	140611221	G	T	snp	exonic	EHMT1	nonsynonymous SNV	rs768764806			0	0	2132	2	2130	0.000938086
chr11	65413784	65413784	G	A	snp	exonic	SIPA1	synonymous SNV	rs778958092			0		2132	2	2130	0.000938086
chr19	2790501	2790501	A	G	snp	exonic	THOP1	nonsynonymous SNV	rs201769518			0	0	2131	2	2129	0.000938527
chr9	91616574	91616574	C	T	snp	exonic	S1PR3	synonymous SNV	rs375567824			8.98E-06	0	2131	2	2129	0.000938527
chr17	38151535	38151535	C	T	snp	exonic	PSMD3	synonymous SNV	rs756209157			0		2131	2	2129	0.000938527
chr5	147807297	147807297	G	T	snp	intronic	FBXO38		rs201680339			9.02E-06		2132	2	2129	0.000938527
chr11	67048378	67048378	G	A	snp	intronic	GRK2		rs561859138					4262	4	4258	0.000938527
chr8	144945439	144945439	C	T	snp	exonic	EPPK1	synonymous SNV	rs373855163			0	0	2130	2	2128	0.000938967
chr11	61563617	61563617	C	T	snp	exonic	FEN1	stopgain	rs749666139			0		2130	2	2128	0.000938967
chr19	56538544	56538544	C	T	snp	exonic	NLRP5	synonymous SNV	rs183644059			1.87E-05	0	2129	2	2127	0.000939408
chr11	57256768	57256768	C	T	snp	exonic	SLC43A1	nonsynonymous SNV	rs370079983			1.79E-05		2129	2	2127	0.000939408
chr7	938645	938645	G	A	snp	intronic	ADAP1		rs751679477			9.46E-06		2129	2	2127	0.000939408
chr19	9271908	9271908	G	A	snp	exonic	ZNF317	synonymous SNV	rs763488817			0		2129	2	2127	0.000939408
chr9	131761936	131761936	T	C	snp	exonic	NUP188	nonsynonymous SNV	rs191670841					2128	2	2126	0.00093985
chr11	500558	500558	G	A	snp	exonic	RNH1	synonymous SNV	rs368615770			2.70E-05	6.67E-05	2128	2	2126	0.00093985
chr19	36128243	36128243	G	A	snp	exonic	RBM42	nonsynonymous SNV	rs753990775			2.70E-05	6.67E-05	2128	2	2126	0.00093985
chr16	837591	837591	G	A	snp	exonic	RPUSD1	synonymous SNV	rs758632208			9.07E-06		2129	2	2126	0.00093985
chr9	91616557	91616557	G	A	snp	exonic	S1PR3	nonsynonymous SNV	rs376952228					2127	2	2125	0.000940291
chr19	55378097	55378097	G	A	snp	exonic	KIR3DL2	nonsynonymous SNV	rs377223138			8.95E-06		2127	2	2125	0.000940291
chr21	46228957	46228957	C	T	snp	intronic	SUMO3		rs769253131			3.58E-05	0	2127	2	2125	0.000940291
chrX	70823625	70823625	G	A	snp	exonic	GCNA	synonymous SNV	rs113212495			1.25E-05		2126	2	2124	0.000940734
chr17	51901296	51901296	C	T	snp	exonic	KIF2B	nonsynonymous SNV	rs753809320			0		2126	2	2124	0.000940734
chr3	48697683	48697683	G	A	snp	exonic	CELSR3	synonymous SNV	rs554549149			1.79E-05	6.67E-05	3189	3	3186	0.000940734
chr19	9071179	9071179	C	T	snp	exonic	MUC16	nonsynonymous SNV	rs138208562			0.0004	0.0002	3189	3	3185	0.000941029
chr9	140611301	140611301	G	A	snp	exonic	EHMT1	synonymous SNV	rs138824805	Uncertain significance	not_provided	4.48E-05		2125	2	2123	0.000941176
chr1	186277306	186277306	G	T	snp	exonic	PRG4	nonsynonymous SNV	rs374653670			0		2125	2	2123	0.000941176
chr16	11370095	11370095	C	T	snp	exonic	PRM2	nonsynonymous SNV	rs768731173			8.95E-06	0	2125	2	2123	0.000941176
chr19	41313215	41313215	T	C	snp	ncRNA_intronic	RAB4B-EGLN2		rs778997932			0		2125	2	2123	0.000941176
chr1	47138733	47138733	G	A	snp	exonic	TEX38	nonsynonymous SNV	rs796522685			3.46E-05		2125	2	2123	0.000941176
chr17	76447689	76447689	C	T	snp	exonic	DNAH17	synonymous SNV	rs746831788			1.83E-05		2124	2	2122	0.00094162
chr11	198573	198573	C	T	snp	exonic	ODF3	synonymous SNV	rs750035275			2.74E-05		2124	2	2122	0.00094162
chr17	71197747	71197747	A	G	snp	exonic	COG1	nonsynonymous SNV	rs763362547			0.0002	0.0002	2124	2	2122	0.00094162
chr5	159545829	159545829	G	A	snp	exonic	PWWP2A	synonymous SNV	rs777653835			0		2124	2	2122	0.00094162
chr6	160499265	160499265	C	T	snp	exonic	IGF2R	synonymous SNV	rs544673055			1.79E-05		2125	2	2122	0.00094162
chr3	49693215	49693215	C	T	snp	exonic	BSN	nonsynonymous SNV	rs768016989			1.79E-05	0	2125	2	2122	0.00094162
chr16	29810775	29810775	G	A	snp	exonic	KIF22	nonsynonymous SNV	rs748823568			0		2123	2	2121	0.000942063
chr4	59471	59471	A	G	snp	intronic	ZNF595;ZNF718		rs760870429			0		2123	2	2121	0.000942063
chr12	120117794	120117794	G	A	snp	exonic	PRKAB1	synonymous SNV	rs769597227			0		2123	2	2121	0.000942063
chr15	23811754	23811754	C	T	snp	exonic	MKRN3	synonymous SNV	rs765812185			8.95E-06		2122	2	2120	0.000942507
chr6	35424062	35424062	G	A	snp	exonic	FANCE	nonsynonymous SNV	rs533815063			0		2121	2	2119	0.000942951
chr17	73201906	73201906	C	T	snp	intronic	NUP85		rs771598863			0		2121	2	2119	0.000942951
chr12	114841540	114841540	G	A	snp	intronic	TBX5		rs778575580			0		2121	2	2119	0.000942951
chr13	26620806	26620806	G	T	snp	exonic	SHISA2	nonsynonymous SNV	rs148336864			8.95E-06		2120	2	2118	0.000943396
chr22	18022267	18022267	G	A	snp	exonic	CECR2	nonsynonymous SNV	rs754905189			3.58E-05		2120	2	2118	0.000943396
chr7	86468534	86468534	C	T	snp	exonic	GRM3	synonymous SNV	rs767586001			0		2120	2	2118	0.000943396
chr19	6714318	6714318	G	A	snp	intronic	C3		rs200523897			1.79E-05		2119	2	2117	0.000943841
chr11	116633502	116633502	C	T	snp	exonic	BUD13	nonsynonymous SNV	rs751731755			2.69E-05		2119	2	2117	0.000943841
chr9	97062958	97062958	C	A	snp	exonic	ZNF169	nonsynonymous SNV	rs756784177			0		2119	2	2117	0.000943841
chr19	14273917	14273917	G	A	snp	exonic	ADGRL1	synonymous SNV	rs761297469			8.96E-06		2119	2	2117	0.000943841
chr1	152191717	152191717	A	G	snp	exonic	HRNR	synonymous SNV	rs763154410			0		2119	2	2117	0.000943841
chr19	9046402	9046402	C	T	snp	exonic	MUC16	synonymous SNV	rs767626601			8.96E-06		2119	2	2117	0.000943841
chr19	41313188	41313188	T	C	snp	ncRNA_intronic	RAB4B-EGLN2		rs369012476			2.69E-05		2120	2	2117	0.000943841
chr2	131673201	131673201	C	A	snp	intergenic	AMER3;ARHGEF4		rs111949406					2118	2	2116	0.000944287
chr2	133540468	133540468	C	T	snp	exonic	NCKAP5	nonsynonymous SNV	rs138188992			1.79E-05	0	2118	2	2116	0.000944287
chr5	140167783	140167783	C	T	snp	exonic	PCDHA1	synonymous SNV	rs146713367			2.69E-05		2118	2	2116	0.000944287
chr9	129595503	129595503	G	A	snp	exonic	ZBTB43	nonsynonymous SNV	rs760541582			0		2118	2	2116	0.000944287
chr20	23548875	23548875	C	T	snp	exonic	CST9L	synonymous SNV	rs763533371			5.37E-05		2118	2	2116	0.000944287
chr11	117066641	117066641	C	T	snp	ncRNA_exonic	LOC100652768		rs867231418					2118	2	2116	0.000944287
chr19	13869746	13869746	G	A	snp	exonic	CCDC130	nonsynonymous SNV	rs373052731			8.09E-05	6.67E-05	2117	2	2115	0.000944733
chr19	6714317	6714317	C	T	snp	intronic	C3		rs747177157			8.96E-06	0	2117	2	2115	0.000944733
chr1	152191726	152191726	T	C	snp	exonic	HRNR	synonymous SNV	rs750311190			0		2117	2	2115	0.000944733
chr7	131853236	131853236	C	T	snp	exonic	PLXNA4	synonymous SNV	rs756256466			8.98E-06	0	2117	2	2115	0.000944733
chr15	89400951	89400951	G	A	snp	exonic	ACAN	nonsynonymous SNV	rs760776040			8.95E-06		2117	2	2115	0.000944733
chr11	62362899	62362899	G	A	snp	exonic	MTA2	synonymous SNV	rs780111889			6.27E-05		2117	2	2115	0.000944733
chr11	3680900	3680900	G	A	snp	exonic	ART1	nonsynonymous SNV	rs368360706			3.60E-05		2116	2	2114	0.00094518
chr13	113803381	113803381	G	A	snp	exonic	F10	synonymous SNV	rs764999398			8.97E-06	6.67E-05	2116	2	2114	0.00094518
chr6	44222990	44222990	C	T	snp	exonic	SLC35B2	nonsynonymous SNV	rs776434992			0		2116	2	2114	0.00094518
chr11	67048377	67048377	C	T	snp	intronic	GRK2		rs190372287				0	4231	4	4227	0.000945403
chr11	1263863	1263863	C	T	snp	exonic	MUC5B	nonsynonymous SNV	rs373667069			1.79E-05		2115	2	2113	0.000945626
chr3	53215836	53215836	C	T	snp	intronic	PRKCD		rs539709083			4.02E-05	0	2115	2	2113	0.000945626
chr7	44924207	44924207	C	T	snp	exonic	PURB	synonymous SNV	rs749557013			0		2115	2	2113	0.000945626
chr9	90321761	90321761	C	T	snp	exonic	DAPK1	nonsynonymous SNV	rs771500801			8.99E-06	0	2115	2	2113	0.000945626
chr17	19186773	19186773	G	A	snp	exonic	EPN2	nonsynonymous SNV	rs774000263			0		2115	2	2113	0.000945626
chr1	23520437	23520437	C	T	snp	exonic	HTR1D	nonsynonymous SNV	rs751117485					2116	2	2113	0.000945626
chr10	49998884	49998884	G	A	snp	exonic	WDFY4	synonymous SNV	rs370956852			1.72E-05	6.67E-05	2114	2	2112	0.000946074
chr11	67048450	67048450	C	T	snp	intronic	GRK2		rs750807460				0.0001	2114	2	2112	0.000946074
chr19	4510965	4510965	C	T	snp	exonic	PLIN4	nonsynonymous SNV	rs754278167			4.49E-05	0	2114	2	2112	0.000946074
chr12	40838234	40838234	G	A	snp	exonic	MUC19	unknown	rs759366629			1.91E-05		2114	2	2112	0.000946074
chr3	142681681	142681681	G	A	snp	exonic	PAQR9	synonymous SNV	rs776505982			6.35E-05		2114	2	2112	0.000946074
chr4	154217007	154217007	G	A	snp	exonic	TRIM2	synonymous SNV	rs781042864			8.96E-06		2114	2	2112	0.000946074
chr19	17922559	17922559	G	A	snp	exonic	B3GNT3	stopgain	rs865860468					2114	2	2112	0.000946074
chr22	19119005	19119005	T	C	snp	exonic	TSSK2	synonymous SNV	rs763628494			1.83E-05	0	2113	2	2111	0.000946522
chr1	1849797	1849797	G	A	snp	exonic	TMEM52	nonsynonymous SNV	rs755156981			9.03E-06		2112	2	2110	0.00094697
chr8	139833454	139833454	G	A	snp	exonic	COL22A1	synonymous SNV	rs200314173			0		2111	2	2109	0.000947418
chr16	67236070	67236070	C	T	snp	intronic	ELMO3		rs781396715			0	6.67E-05	2111	2	2109	0.000947418
chr3	122003671	122003671	A	G	snp	exonic	CASR	nonsynonymous SNV	rs150979829	Uncertain significance|Uncertain significance	Hypocalcemia\x2c_autosomal_dominant_1|Hypocalciuric_hypercalcemia\x2c_familial\x2c_type_1	2.69E-05	0.0002	2110	2	2108	0.000947867
chr20	31023473	31023473	C	T	snp	exonic	ASXL1	synonymous SNV	rs200471411			1.79E-05		2110	2	2108	0.000947867
chr16	66420811	66420811	G	A	snp	exonic	CDH5	nonsynonymous SNV	rs754674689			0	0	2110	2	2108	0.000947867
chr4	41984018	41984018	C	T	snp	exonic	DCAF4L1	nonsynonymous SNV	rs754119361			0		2111	2	2108	0.000947867
chr21	47552392	47552392	G	A	snp	exonic	COL6A2	nonsynonymous SNV	rs142432514	Uncertain significance|Uncertain significance	Myosclerosis|Collagen_VI-related_myopathy	9.47E-05	0.0001	2109	2	2107	0.000948317
chr3	195510964	195510964	C	G	snp	exonic	MUC4	nonsynonymous SNV	rs201759480			0.0029	0.0019	2109	2	2107	0.000948317
chr7	97822957	97822957	C	T	snp	exonic	LMTK2	synonymous SNV	rs746162828			8.96E-06		2109	2	2107	0.000948317
chr3	122843126	122843126	C	T	snp	exonic	PDIA5	nonsynonymous SNV	rs766376617			1.79E-05		2109	2	2107	0.000948317
chr17	65040914	65040914	C	T	snp	exonic	CACNG1	synonymous SNV	rs140686694			3.59E-05	0	2108	2	2106	0.000948767
chr19	34263501	34263501	G	A	snp	exonic	CHST8	nonsynonymous SNV	rs200371985					2108	2	2106	0.000948767
chr7	100676905	100676905	T	C	snp	exonic	MUC17	synonymous SNV	rs71557222			0	0	2108	2	2106	0.000948767
chr9	124522263	124522263	G	A	snp	exonic	DAB2IP	nonsynonymous SNV	rs752730852			2.69E-05	6.67E-05	2108	2	2106	0.000948767
chr16	3170127	3170127	C	T	snp	exonic	ZNF205	nonsynonymous SNV	rs767569025			9.01E-06		2108	2	2106	0.000948767
chr16	19195180	19195180	G	A	snp	exonic	SYT17	nonsynonymous SNV	rs771981720			1.79E-05	0.0001	2108	2	2106	0.000948767
chr1	160012106	160012106	C	T	snp	exonic	KCNJ10	nonsynonymous SNV	rs779548724			9.01E-06		2108	2	2106	0.000948767
chr16	11370108	11370108	G	A	snp	exonic	PRM2	synonymous SNV	rs369993666			3.58E-05	0	2107	2	2105	0.000949217
chr17	21202267	21202267	C	A	snp	intronic	MAP2K3		rs750273704			0	0	2107	2	2105	0.000949217
chrX	153593136	153593136	C	T	snp	intronic	FLNA		rs781994331			0		2108	2	2105	0.000949217
chr15	65489713	65489713	G	A	snp	exonic	CILP	nonsynonymous SNV	rs369696446			8.95E-06		2105	2	2103	0.000950119
chr1	167096421	167096421	C	T	snp	exonic	DUSP27	nonsynonymous SNV	rs370561353			8.99E-06	0	2105	2	2103	0.000950119
chr9	35680898	35680898	C	T	snp	intronic	CA9		rs376242893					2105	2	2103	0.000950119
chr19	10395194	10395194	C	T	snp	exonic	ICAM1	synonymous SNV	rs781009982			2.70E-05	0	2105	2	2103	0.000950119
chr3	52522217	52522217	C	T	snp	exonic	NISCH	synonymous SNV	rs201307683			8.99E-05		2104	2	2102	0.00095057
chr3	57543174	57543174	G	A	snp	exonic	PDE12	synonymous SNV	rs748561375			5.37E-05	0.0001	2104	2	2102	0.00095057
chr1	46489605	46489605	C	A	snp	exonic	MAST2	nonsynonymous SNV	rs867241573					2104	2	2102	0.00095057
chr3	52558148	52558148	G	A	snp	exonic	STAB1	synonymous SNV	rs139217339			0		2103	2	2101	0.000951022
chr1	32745395	32745395	C	T	snp	intronic	LCK		rs369495108			7.20E-05	6.66E-05	2103	2	2101	0.000951022
chr8	123965567	123965567	C	T	snp	exonic	ZHX2	nonsynonymous SNV	rs565561893			0		2103	2	2101	0.000951022
chr15	42977730	42977730	C	T	snp	exonic	STARD9	synonymous SNV	rs767745806			1.80E-05		2103	2	2101	0.000951022
chr1	18149732	18149732	G	T	snp	exonic	ACTL8	nonsynonymous SNV	rs773765782			8.95E-06		2103	2	2101	0.000951022
chr9	140611304	140611304	G	A	snp	exonic	EHMT1	synonymous SNV	rs576731460			0.0001	6.69E-05	2102	2	2100	0.000951475
chr7	48443366	48443366	G	A	snp	exonic	ABCA13	nonsynonymous SNV	rs749364642			5.38E-05		2103	2	2100	0.000951475
chr4	7435599	7435599	G	T	snp	exonic	PSAPL1	stopgain	rs554868027			0		2101	2	2099	0.000951928
chr12	56862982	56862982	C	T	snp	exonic	SPRYD4	nonsynonymous SNV	rs755752839			0		2101	2	2099	0.000951928
chr1	21936661	21936661	G	A	snp	exonic	RAP1GAP	synonymous SNV	rs758304784			6.27E-05		2101	2	2099	0.000951928
chr10	50946000	50946000	C	T	snp	exonic	OGDHL	nonsynonymous SNV	rs758422686			0		2101	2	2099	0.000951928
chr19	14829799	14829799	C	T	snp	exonic	ZNF333	stopgain	rs765158203			1.79E-05		2101	2	2099	0.000951928
chr12	40876791	40876791	C	G	snp	exonic	MUC19	unknown	rs79631193				0	3152	3	3148	0.000952079
chr16	57155097	57155097	C	T	snp	exonic	CPNE2	synonymous SNV	rs370649847			0		2100	2	2098	0.000952381
chr16	3707206	3707206	G	T	snp	exonic	DNASE1	nonsynonymous SNV	rs142644209			8.96E-06		2099	2	2097	0.000952835
chr7	97822931	97822931	G	A	snp	exonic	LMTK2	nonsynonymous SNV	rs200084646			8.96E-06		2099	2	2097	0.000952835
chr10	50946093	50946093	C	T	snp	exonic	OGDHL	nonsynonymous SNV	rs200146887			0		2099	2	2097	0.000952835
chr12	40877704	40877704	C	T	snp	exonic	MUC19	unknown	rs796546299			0	0.0002	2099	2	2097	0.000952835
chr3	49160752	49160752	C	T	snp	exonic	LAMB2	nonsynonymous SNV	rs149144377			2.69E-05		2098	2	2096	0.000953289
chr6	5369126	5369126	C	T	snp	exonic	FARS2	nonsynonymous SNV	rs374957295			0.0001	0.0005	2098	2	2096	0.000953289
chr16	67265431	67265431	C	A	snp	exonic	FHOD1	nonsynonymous SNV	rs376122137					2098	2	2096	0.000953289
chr8	125463661	125463661	G	A	snp	exonic	TRMT12	nonsynonymous SNV	rs534057532			0	0	2098	2	2096	0.000953289
chr2	119988540	119988540	G	A	snp	UTR5	STEAP3		rs202117646			0.0016	0.0007	2099	2	2096	0.000953289
chr2	226446937	226446937	C	T	snp	exonic	NYAP2	synonymous SNV	rs746382288			8.95E-06		2099	2	2096	0.000953289
chr3	150127720	150127720	C	G	snp	exonic	TSC22D2	nonsynonymous SNV	rs151118479			0		2097	2	2095	0.000953743
chr16	27353540	27353540	G	A	snp	exonic	IL4R	nonsynonymous SNV	rs200293983			1.79E-05		2097	2	2095	0.000953743
chr3	53215837	53215837	G	A	snp	intronic	PRKCD		rs542042510			4.04E-05	0.0001	2097	2	2095	0.000953743
chr9	90321762	90321762	G	A	snp	exonic	DAPK1	nonsynonymous SNV	rs746709775			8.99E-06		2097	2	2095	0.000953743
chr7	100678350	100678350	G	A	snp	exonic	MUC17	nonsynonymous SNV	rs753327030			1.79E-05	6.69E-05	2097	2	2095	0.000953743
chr9	131670409	131670409	G	A	snp	exonic	LRRC8A	synonymous SNV	rs755255742			8.96E-06		2097	2	2095	0.000953743
chr22	21800936	21800936	G	A	snp	exonic	HIC2	synonymous SNV	rs772427954			3.59E-05		2096	2	2094	0.000954198
chr16	21531480	21531480	G	A	snp	ncRNA_exonic	SLC7A5P2		rs772655755			0		2096	2	2094	0.000954198
chr15	79748822	79748822	G	A	snp	exonic	KIAA1024	synonymous SNV	rs564242424			0		2097	2	2094	0.000954198
chr9	138662249	138662249	C	T	snp	exonic	KCNT1	synonymous SNV	rs373520472	Likely benign|Likely benign|Likely benign	not_specified|Early_infantile_epileptic_encephalopathy_14|Epilepsy\x2c_nocturnal_frontal_lobe\x2c_5	0.0001	0.0001	3143	3	3140	0.000954502
chr5	140789218	140789218	C	T	snp	exonic	PCDHGB6	synonymous SNV	rs368524337			8.98E-06		2095	2	2093	0.000954654
chr17	73126839	73126839	G	A	snp	intronic	NT5C		rs768473987					2095	2	2093	0.000954654
chr9	116811549	116811549	G	A	snp	exonic	ZNF618	nonsynonymous SNV	rs773966476			6.32E-05	0	2095	2	2093	0.000954654
chr16	31092311	31092311	C	T	snp	exonic	ZNF646	stopgain	rs777697288			8.96E-06		2095	2	2093	0.000954654
chr7	86468427	86468427	C	T	snp	exonic	GRM3	nonsynonymous SNV	rs778683864			8.99E-06		2095	2	2093	0.000954654
chr1	887985	887985	G	A	snp	intronic	NOC2L		rs377172421			4.51E-05	0	2096	2	2093	0.000954654
chr16	67264353	67264353	C	T	snp	exonic	FHOD1	nonsynonymous SNV	rs138705012			6.27E-05		2094	2	2092	0.00095511
chr17	18144811	18144811	C	T	snp	exonic	LLGL1	nonsynonymous SNV	rs753689203			8.99E-06		2094	2	2092	0.00095511
chr6	160499303	160499303	C	A	snp	exonic	IGF2R	nonsynonymous SNV	rs754279467					2094	2	2092	0.00095511
chr10	7621822	7621822	G	A	snp	exonic	ITIH5	synonymous SNV	rs756084635			0		2094	2	2092	0.00095511
chr14	102452539	102452539	G	A	snp	exonic	DYNC1H1	synonymous SNV	rs151170554			8.97E-06	0	2093	2	2091	0.000955566
chr3	186953732	186953732	C	T	snp	exonic	MASP1	nonsynonymous SNV	rs765808321			2.69E-05	6.67E-05	2092	2	2090	0.000956023
chr5	140744543	140744543	G	A	snp	exonic	PCDHGA5	nonsynonymous SNV	rs781674344			8.97E-06		2092	2	2090	0.000956023
chr11	1253910	1253910	G	A	snp	exonic	MUC5B	nonsynonymous SNV	rs770066523			9.42E-06	0	2091	2	2089	0.00095648
chr11	120998539	120998539	C	T	snp	exonic	TECTA	nonsynonymous SNV	rs779314752			8.99E-06		2091	2	2089	0.00095648
chr2	27599026	27599026	G	A	snp	exonic	SNX17	synonymous SNV	rs760799848			0		2093	2	2089	0.00095648
chr10	391017	391017	G	T	snp	exonic	DIP2C	nonsynonymous SNV	rs199521796			0		2090	2	2088	0.000956938
chr4	1817558	1817558	C	T	snp	intronic	LETM1		rs376633521			2.73E-05	0	2090	2	2088	0.000956938
chr6	292612	292612	C	T	snp	intronic	DUSP22		rs568297421			0		2090	2	2088	0.000956938
chr7	100676727	100676727	G	A	snp	exonic	MUC17	nonsynonymous SNV	rs769668303			1.79E-05		2090	2	2088	0.000956938
chr19	13869737	13869737	G	A	snp	exonic	CCDC130	nonsynonymous SNV	rs776178898			0		2090	2	2088	0.000956938
chr21	47423582	47423582	C	T	snp	exonic	COL6A1	synonymous SNV	rs115163637	other|Likely benign	not_specified|Collagen_VI-related_myopathy	2.72E-05	0	2089	2	2087	0.000957396
chr20	18296579	18296579	G	A	snp	exonic	ZNF133	nonsynonymous SNV	rs140792646			0		2089	2	2087	0.000957396
chr20	62839650	62839650	G	A	snp	exonic	MYT1	synonymous SNV	rs148738850			8.96E-06	6.68E-05	2089	2	2087	0.000957396
chr19	1360346	1360346	C	T	snp	exonic	MUM1	synonymous SNV	rs577420555			8.98E-06		2089	2	2087	0.000957396
chr19	41122906	41122906	C	T	snp	exonic	LTBP4	unknown	rs771821666			1.80E-05	0	2089	2	2087	0.000957396
chr2	37035805	37035805	G	A	snp	exonic	VIT	nonsynonymous SNV	rs200494736			2.69E-05	6.68E-05	2088	2	2086	0.000957854
chr21	47552289	47552289	G	A	snp	exonic	COL6A2	synonymous SNV	rs369756029			0	6.68E-05	2088	2	2086	0.000957854
chr19	9064663	9064663	T	C	snp	exonic	MUC16	nonsynonymous SNV	rs377262738			6.29E-05		2088	2	2086	0.000957854
chr1	33354832	33354832	C	T	snp	exonic	HPCA	synonymous SNV	rs577855084			8.98E-06		2088	2	2086	0.000957854
chr14	105453091	105453091	A	G	snp	exonic	C14orf79	nonsynonymous SNV	rs766759581			0.0001	0	2088	2	2086	0.000957854
chr1	43296727	43296727	G	A	snp	exonic	ERMAP	nonsynonymous SNV	rs780299336			4.56E-05	0	2088	2	2086	0.000957854
chr17	79390412	79390412	G	A	snp	intronic	BAHCC1		rs556520461				0.0006	3131	3	3128	0.00095816
chr5	140167778	140167778	C	T	snp	exonic	PCDHA1	nonsynonymous SNV	rs144781571			3.58E-05	0.0001	2087	2	2085	0.000958313
chr12	56963736	56963736	G	T	snp	exonic	RBMS2	nonsynonymous SNV	rs149875820			0	0	2087	2	2085	0.000958313
chr17	62007578	62007578	T	C	snp	exonic	CD79B	nonsynonymous SNV	rs201757742			0.0003	6.68E-05	2087	2	2085	0.000958313
chr16	67472599	67472599	A	G	snp	intronic	ATP6V0D1		rs376528391			0		2087	2	2085	0.000958313
chr21	41711169	41711169	C	T	snp	exonic	DSCAM	nonsynonymous SNV	rs572529984			0		2087	2	2085	0.000958313
chr9	94486777	94486777	C	T	snp	exonic	ROR2	nonsynonymous SNV	rs770190188			3.58E-05	0.0001	2087	2	2085	0.000958313
chr22	50280057	50280057	G	A	snp	exonic	ZBED4	nonsynonymous SNV	rs779836489			0		3130	3	3127	0.000958466
chr16	1507303	1507303	G	A	snp	exonic	CLCN7	synonymous SNV	rs376136801			0		2085	2	2083	0.000959233
chr16	2817138	2817138	C	T	snp	exonic	SRRM2	synonymous SNV	rs61747729			8.06E-05		2085	2	2083	0.000959233
chr8	99440578	99440578	A	G	snp	exonic	KCNS2	nonsynonymous SNV	rs772878262			2.69E-05		2085	2	2083	0.000959233
chr19	4511376	4511376	C	A	snp	exonic	PLIN4	nonsynonymous SNV	rs200819033			0	0	2084	2	2082	0.000959693
chr19	9059293	9059293	C	A	snp	exonic	MUC16	nonsynonymous SNV	rs566323316			0	0	2084	2	2082	0.000959693
chr19	10200639	10200639	C	T	snp	exonic	C19orf66	synonymous SNV	rs567222699			1.82E-05		2084	2	2082	0.000959693
chr1	230846279	230846279	G	A	snp	exonic	AGT	synonymous SNV	rs751222492			0		2084	2	2082	0.000959693
chr16	67264362	67264362	C	T	snp	exonic	FHOD1	nonsynonymous SNV	rs768363225			8.96E-06		2084	2	2082	0.000959693
chr16	30750281	30750281	C	T	snp	exonic	SRCAP	nonsynonymous SNV	rs867037721					2084	2	2082	0.000959693
chr1	152191331	152191331	C	T	snp	exonic	HRNR	nonsynonymous SNV	rs141472304			0		2083	2	2081	0.000960154
chr14	24662178	24662178	G	A	snp	exonic	TM9SF1	nonsynonymous SNV	rs761060583			0	6.66E-05	2083	2	2081	0.000960154
chr10	104595092	104595092	C	T	snp	exonic	CYP17A1	nonsynonymous SNV	rs774980374			0		2083	2	2081	0.000960154
chr22	50965981	50965981	G	A	snp	intronic	TYMP		rs368102938			0		2082	2	2080	0.000960615
chr13	26620810	26620810	C	T	snp	exonic	SHISA2	synonymous SNV	rs781508738			0		2082	2	2080	0.000960615
chr6	11103978	11103978	C	A	snp	exonic	ERVFRD-1	synonymous SNV	rs750832373					2083	2	2080	0.000960615
chrX	54957261	54957261	C	T	snp	exonic	TRO	synonymous SNV	rs777209459			1.28E-05		2083	2	2080	0.000960615
chr11	2424251	2424251	G	C	snp	exonic	TSSC4	nonsynonymous SNV	rs750373774			0		2081	2	2079	0.000961076
chr22	50546613	50546613	G	A	snp	exonic	MOV10L1	nonsynonymous SNV	rs780670928			8.97E-06	0	2081	2	2079	0.000961076
chr1	212799380	212799380	G	A	snp	exonic	FAM71A	nonsynonymous SNV	rs766346982			0		2080	2	2078	0.000961538
chr14	24032917	24032917	C	T	snp	ncRNA_intronic	LOC102724814		rs556896475			0		2081	2	2078	0.000961538
chr11	1031954	1031954	G	A	snp	exonic	MUC6	nonsynonymous SNV	rs755046915			5.38E-05		2079	2	2077	0.000962001
chr17	48614009	48614009	A	G	snp	exonic	EPN3	nonsynonymous SNV	rs757315511					2079	2	2077	0.000962001
chr7	70255276	70255276	C	T	snp	exonic	AUTS2	nonsynonymous SNV	rs758531526			1.84E-05		2079	2	2077	0.000962001
chr1	152191678	152191678	A	G	snp	exonic	HRNR	synonymous SNV	rs770833668			8.95E-06		2079	2	2077	0.000962001
chr6	158454616	158454616	C	T	snp	exonic	SYNJ2	synonymous SNV	rs774619398			2.69E-05	0.0001	2079	2	2077	0.000962001
chr19	14273936	14273936	C	T	snp	exonic	ADGRL1	nonsynonymous SNV	rs751818898			8.96E-06		2080	2	2077	0.000962001
chr12	122255779	122255779	G	A	snp	exonic	SETD1B	synonymous SNV	rs753984504			0		3118	3	3115	0.000962155
chr19	33697150	33697150	G	A	snp	exonic	LRP3	nonsynonymous SNV	rs551105294			9.47E-06		2078	2	2076	0.000962464
chr8	145998595	145998595	G	A	snp	UTR3	ZNF34		rs556768278					2078	2	2076	0.000962464
chr1	152191653	152191653	C	T	snp	exonic	HRNR	nonsynonymous SNV	rs143566650			8.95E-05	0	2079	2	2076	0.000962464
chr11	75282930	75282930	C	T	snp	exonic	SERPINH1	synonymous SNV	rs199548932			0.0001	6.67E-05	2077	2	2075	0.000962927
chr11	75282936	75282936	C	T	snp	exonic	SERPINH1	synonymous SNV	rs554388551			1.79E-05	0	2077	2	2075	0.000962927
chr5	131607663	131607663	G	A	snp	intronic	PDLIM4		rs563176113				0	2077	2	2075	0.000962927
chr1	152325786	152325786	A	C	snp	exonic	FLG2	nonsynonymous SNV	rs749699546			9.00E-06	0.0089	2077	2	2075	0.000962927
chr17	65040929	65040929	C	T	snp	exonic	CACNG1	synonymous SNV	rs761706676			8.97E-06		2077	2	2075	0.000962927
chr22	35947960	35947960	T	C	snp	exonic	RASD2	nonsynonymous SNV	rs765343551			8.97E-06		2077	2	2075	0.000962927
chr17	21318750	21318750	C	T	snp	exonic	KCNJ12;KCNJ18	synonymous SNV	rs781844002			0		4153	4	4149	0.000963159
chr8	139833447	139833447	G	A	snp	exonic	COL22A1	nonsynonymous SNV	rs140025311			8.98E-06	6.67E-05	2076	2	2074	0.000963391
chr13	96086195	96086195	G	A	snp	exonic	CLDN10	synonymous SNV	rs149372773			0.0017	0.0017	2076	2	2074	0.000963391
chr20	31590418	31590418	C	T	snp	exonic	SUN5	synonymous SNV	rs376720906			2.69E-05		2076	2	2074	0.000963391
chr19	50957394	50957394	C	A	snp	exonic	MYBPC2	nonsynonymous SNV	rs764430761			1.80E-05		2076	2	2074	0.000963391
chr17	74288821	74288821	G	A	snp	exonic	QRICH2	nonsynonymous SNV	rs766710209			8.95E-06		2076	2	2074	0.000963391
chr17	78320952	78320952	C	A	snp	exonic	RNF213	stopgain	rs369126465					2077	2	2074	0.000963391
chr5	133901892	133901892	C	T	snp	exonic	JADE2	synonymous SNV	rs745623644			1.79E-05	0.0002	2075	2	2073	0.000963855
chr3	49936542	49936542	G	A	snp	exonic	MST1R	nonsynonymous SNV	rs746538889			8.99E-06		2075	2	2073	0.000963855
chr20	57430133	57430133	C	T	snp	exonic	GNAS	nonsynonymous SNV	rs767448638			9.00E-06		2075	2	2073	0.000963855
chr5	177574896	177574896	G	A	snp	intronic	RMND5B		rs376883736			0	6.67E-05	2074	2	2072	0.00096432
chr20	33703692	33703692	C	T	snp	exonic	EDEM2	synonymous SNV	rs746770720			8.97E-06		2074	2	2072	0.00096432
chr2	219510957	219510957	C	T	snp	exonic	ZNF142	nonsynonymous SNV	rs749972799					2074	2	2072	0.00096432
chr11	1256569	1256569	C	T	snp	exonic	MUC5B	nonsynonymous SNV	rs767367718			8.98E-06		2074	2	2072	0.00096432
chr17	62022890	62022890	C	T	snp	exonic	SCN4A	nonsynonymous SNV	rs775287099			0	0	2074	2	2072	0.00096432
chr16	70190654	70190654	G	A	snp	exonic	PDPR	nonsynonymous SNV	rs759136755			0		3111	3	3108	0.00096432
chr19	50957402	50957402	C	T	snp	exonic	MYBPC2	synonymous SNV	rs367928657			8.99E-06		2073	2	2071	0.000964785
chr22	29879414	29879414	C	T	snp	exonic	NEFH	nonsynonymous SNV	rs372588415			7.17E-05	6.68E-05	2073	2	2071	0.000964785
chr14	105517675	105517675	C	T	snp	exonic	GPR132	nonsynonymous SNV	rs61737948			0.0035	0.0037	2073	2	2071	0.000964785
chr12	123494520	123494520	C	T	snp	exonic	PITPNM2	nonsynonymous SNV	rs201145774			7.16E-05	0	2072	2	2070	0.000965251
chr17	18144791	18144791	G	A	snp	exonic	LLGL1	synonymous SNV	rs555288273			9.03E-06		2072	2	2070	0.000965251
chr7	100678484	100678484	G	A	snp	exonic	MUC17	nonsynonymous SNV	rs768504451			0		2072	2	2070	0.000965251
chr19	10200662	10200662	G	A	snp	exonic	C19orf66	nonsynonymous SNV	rs776478367			0		2072	2	2070	0.000965251
chr1	169796807	169796807	T	A	snp	intronic	C1orf112		rs200087107			0.0031	0.0054	3107	3	3104	0.000965562
chr19	30934808	30934808	C	A	snp	exonic	ZNF536	synonymous SNV	rs201200479			9.00E-06		2071	2	2069	0.000965717
chr17	40459555	40459555	C	T	snp	intronic	STAT5A		rs369258285			3.58E-05	0.0002	2071	2	2069	0.000965717
chr14	105517703	105517703	C	T	snp	exonic	GPR132	synonymous SNV	rs763198085			0	6.67E-05	2071	2	2069	0.000965717
chr6	155450635	155450635	C	T	snp	exonic	TIAM2	nonsynonymous SNV	rs141887143			8.96E-06		2070	2	2068	0.000966184
chr8	146278687	146278687	G	A	snp	exonic	C8orf33	synonymous SNV	rs145211011			0		2070	2	2068	0.000966184
chr11	6079064	6079064	A	G	snp	intergenic	OR56A1;OR56B4		rs746254407					2070	2	2068	0.000966184
chr7	100682903	100682903	G	A	snp	exonic	MUC17	nonsynonymous SNV	rs537687805			0		2069	2	2067	0.000966651
chr22	38061848	38061848	C	T	snp	exonic	PDXP	synonymous SNV	rs771295866			9.02E-06	6.68E-05	2069	2	2067	0.000966651
chr12	133324620	133324620	G	A	snp	intronic	ANKLE2		rs761129809			2.79E-05		2070	2	2067	0.000966651
chr9	129595573	129595573	C	T	snp	exonic	ZBTB43	nonsynonymous SNV	rs142327112			5.47E-05	0.0001	2068	2	2066	0.000967118
chr3	52425246	52425246	C	T	snp	exonic	DNAH1	nonsynonymous SNV	rs368568444			3.59E-05	6.67E-05	2068	2	2066	0.000967118
chr3	49160690	49160690	G	A	snp	exonic	LAMB2	nonsynonymous SNV	rs554614865			1.79E-05	0	2068	2	2066	0.000967118
chr9	94486762	94486762	C	T	snp	exonic	ROR2	nonsynonymous SNV	rs55651110			4.48E-05	0.0001	2068	2	2066	0.000967118
chr20	58514347	58514347	G	T	snp	exonic	PPP1R3D	nonsynonymous SNV	rs556567480					2068	2	2066	0.000967118
chr1	33613085	33613085	C	T	snp	exonic	TRIM62	nonsynonymous SNV	rs768648729			0		2068	2	2066	0.000967118
chr1	10700033	10700033	G	A	snp	exonic	CASZ1	nonsynonymous SNV	rs772938935			0		2068	2	2066	0.000967118
chr1	3396412	3396412	C	T	snp	exonic	ARHGEF16	nonsynonymous SNV	rs180731913			0	0	2067	2	2065	0.000967586
chr22	38823552	38823552	G	A	snp	exonic	KCNJ4	nonsynonymous SNV	rs193920820	Uncertain significance	Malignant_tumor_of_prostate			2067	2	2065	0.000967586
chr19	46733584	46733584	G	C	snp	exonic	IGFL1	nonsynonymous SNV	rs540743011			0		2067	2	2065	0.000967586
chr1	16754499	16754499	C	T	snp	intronic	SPATA21		rs754004680			3.85E-05		2067	2	2065	0.000967586
chr5	39382837	39382837	T	C	snp	exonic	DAB2	nonsynonymous SNV	rs766184950			0		2067	2	2065	0.000967586
chr19	37853800	37853800	T	C	snp	exonic	HKR1	nonsynonymous SNV	rs768123644			0		2067	2	2065	0.000967586
chr19	9046793	9046793	T	C	snp	exonic	MUC16	nonsynonymous SNV	rs773323423			8.97E-06		2067	2	2065	0.000967586
chr16	55519252	55519252	C	T	snp	exonic	MMP2	synonymous SNV	rs778965210			8.95E-06		2067	2	2065	0.000967586
chr19	14829829	14829829	T	A	snp	exonic	ZNF333	nonsynonymous SNV	rs796921330					2067	2	2065	0.000967586
chr6	159653932	159653932	C	T	snp	exonic	FNDC1	synonymous SNV	rs763282736			0		2066	2	2064	0.000968054
chr9	135863749	135863749	T	C	snp	exonic	GFI1B	nonsynonymous SNV	rs775944163			0.0027		2066	2	2064	0.000968054
chr1	1888168	1888168	G	A	snp	exonic	CFAP74	nonsynonymous SNV	rs199904010			0.0004	0.0002	2065	2	2063	0.000968523
chr10	85991732	85991732	T	C	snp	exonic	LRIT1	nonsynonymous SNV	rs542883059			0		2065	2	2063	0.000968523
chr17	78320974	78320974	G	A	snp	exonic	RNF213	nonsynonymous SNV	rs769511279			0		2065	2	2063	0.000968523
chr22	39770488	39770488	C	T	snp	exonic	SYNGR1	synonymous SNV	rs114689408			1.80E-05	0	2064	2	2062	0.000968992
chr16	66919072	66919072	G	C	snp	exonic	PDP2	nonsynonymous SNV	rs199876227			1.79E-05	0	2064	2	2062	0.000968992
chr22	35947776	35947776	C	T	snp	exonic	RASD2	synonymous SNV	rs376468893			4.50E-05		2064	2	2062	0.000968992
chr4	59463	59463	C	T	snp	intronic	ZNF595;ZNF718		rs778894374			0	0	2064	2	2062	0.000968992
chr19	55715247	55715247	G	A	snp	exonic	PTPRH	synonymous SNV	rs537508984			8.95E-06		2063	2	2061	0.000969462
chr9	140086664	140086664	G	A	snp	intronic	TPRN		rs759231138			0	0	2063	2	2061	0.000969462
chr22	24582074	24582074	C	T	snp	exonic	SUSD2	nonsynonymous SNV	rs761170227			9.09E-06		2063	2	2061	0.000969462
chr11	1263896	1263896	C	A	snp	exonic	MUC5B	nonsynonymous SNV	rs777358856			2.69E-05		2063	2	2061	0.000969462
chr19	40430399	40430399	G	A	snp	exonic	FCGBP	nonsynonymous SNV	rs139856004			0		2062	2	2060	0.000969932
chr9	36171026	36171026	C	A	snp	exonic	CCIN	nonsynonymous SNV	rs145792420			0.0001	0.0009	2062	2	2060	0.000969932
chr3	49693081	49693081	G	A	snp	exonic	BSN	nonsynonymous SNV	rs147711810			4.49E-05	0	2062	2	2060	0.000969932
chr9	115652203	115652203	G	A	snp	exonic	SLC46A2	synonymous SNV	rs7022287			8.96E-06	6.67E-05	2062	2	2060	0.000969932
chr3	48510414	48510414	C	T	snp	UTR3	SHISA5		rs745528486			2.72E-05		2062	2	2060	0.000969932
chr19	45648483	45648483	C	T	snp	exonic	PPP1R37	nonsynonymous SNV	rs751636367			0		2062	2	2060	0.000969932
chr2	220088695	220088695	G	A	snp	exonic	ATG9A	nonsynonymous SNV	rs754562047			9.01E-06		2062	2	2060	0.000969932
chr19	36593956	36593956	G	A	snp	exonic	WDR62	nonsynonymous SNV	rs758973510			1.79E-05		2062	2	2060	0.000969932
chr11	6645059	6645059	A	T	snp	exonic	DCHS1	synonymous SNV	rs780328032			2.69E-05		2062	2	2060	0.000969932
chr16	1507311	1507311	C	T	snp	exonic	CLCN7	nonsynonymous SNV	rs200451681			0		2061	2	2059	0.000970403
chr19	8808111	8808111	C	T	snp	exonic	ACTL9	nonsynonymous SNV	rs34643842			0	0	2061	2	2059	0.000970403
chr1	1957151	1957151	C	T	snp	exonic	GABRD	synonymous SNV	rs373608463			0.0001	0	2061	2	2059	0.000970403
chr11	46563785	46563785	G	A	snp	exonic	AMBRA1	synonymous SNV	rs375558035			3.58E-05	0.0001	2061	2	2059	0.000970403
chr19	2717423	2717423	G	A	snp	exonic	DIRAS1	nonsynonymous SNV	rs201090486					2062	2	2059	0.000970403
chr16	2111973	2111973	C	A	snp	exonic	TSC2	stopgain	rs397514897	not provided	Tuberous_sclerosis_syndrome			2060	2	2058	0.000970874
chr19	41313150	41313150	C	T	snp	exonic	EGLN2	synonymous SNV	rs758166309					2060	2	2058	0.000970874
chr22	41077782	41077782	C	T	snp	exonic	MCHR1	synonymous SNV	rs578112438			0		2059	2	2057	0.000971345
chr9	38396026	38396026	G	A	snp	exonic	ALDH1B1	nonsynonymous SNV	rs138473422	Uncertain significance	not_specified	2.69E-05	0	2058	2	2056	0.000971817
chr10	72195109	72195109	C	T	snp	exonic	NODAL	nonsynonymous SNV	rs555563029			0		2058	2	2056	0.000971817
chr2	234355430	234355430	C	T	snp	exonic	DGKD	synonymous SNV	rs766867232			7.17E-05	6.67E-05	2058	2	2056	0.000971817
chr14	24785185	24785185	G	A	snp	exonic	LTB4R	nonsynonymous SNV	rs777822890			0		2058	2	2056	0.000971817
chr14	86089196	86089196	C	T	snp	exonic	FLRT2	synonymous SNV	rs142242956			0		2057	2	2055	0.00097229
chr17	74288322	74288322	C	T	snp	exonic	QRICH2	nonsynonymous SNV	rs145823179			0.0003	0.0001	2057	2	2055	0.00097229
chr9	131670479	131670479	C	T	snp	exonic	LRRC8A	nonsynonymous SNV	rs369271984			0		2057	2	2055	0.00097229
chr20	62421587	62421587	G	A	snp	exonic	ZBTB46	nonsynonymous SNV	rs377385397			1.84E-05	0.0001	2057	2	2055	0.00097229
chr1	44683996	44683996	C	T	snp	exonic	DMAP1	nonsynonymous SNV	rs751370692			0		2057	2	2055	0.00097229
chr7	938557	938557	G	A	snp	UTR3	ADAP1		rs771334501			1.96E-05	0.0001	2057	2	2055	0.00097229
chr16	66919050	66919050	G	A	snp	exonic	PDP2	nonsynonymous SNV	rs778015440			8.97E-06	0	2057	2	2055	0.00097229
chr12	122079426	122079426	G	T	snp	exonic	ORAI1	synonymous SNV	rs781878981			0		2057	2	2055	0.00097229
chr16	57155101	57155101	C	T	snp	exonic	CPNE2	nonsynonymous SNV	rs868639344					2057	2	2055	0.00097229
chr11	120998642	120998642	C	T	snp	exonic	TECTA	synonymous SNV	rs747111090			0		2056	2	2054	0.000972763
chr19	10403495	10403495	A	G	snp	exonic	ICAM5	nonsynonymous SNV	rs765977465			0		2056	2	2054	0.000972763
chr11	1256570	1256570	G	A	snp	exonic	MUC5B	nonsynonymous SNV	rs201455946			8.98E-06	0	2055	2	2053	0.000973236
chr2	220421227	220421227	C	T	snp	exonic	OBSL1	nonsynonymous SNV	rs375101491	Uncertain significance	Three_M_syndrome	0.0003	0.0004	2055	2	2053	0.000973236
chr15	39874777	39874777	G	T	snp	exonic	THBS1	nonsynonymous SNV	rs747214338			0		2055	2	2053	0.000973236
chr9	21350839	21350839	G	A	snp	exonic	IFNA6	synonymous SNV	rs752908789			0		2055	2	2053	0.000973236
chr10	104157983	104157983	C	T	snp	exonic	NFKB2	nonsynonymous SNV	rs769218279			8.95E-06		2055	2	2053	0.000973236
chr19	18546483	18546483	C	A	snp	exonic	ISYNA1	nonsynonymous SNV	rs775362357			9.15E-06		3082	3	3079	0.000973394
chr7	100680563	100680563	C	T	snp	exonic	MUC17	nonsynonymous SNV	rs200456398			0		2054	2	2052	0.00097371
chr3	195515868	195515868	T	C	snp	exonic	MUC4	synonymous SNV	rs375943238			8.96E-06		2054	2	2052	0.00097371
chr19	55175430	55175430	C	T	snp	exonic	LILRB4	nonsynonymous SNV	rs145519196			8.95E-06		2053	2	2051	0.000974184
chr1	120459028	120459028	G	T	snp	exonic	NOTCH2	nonsynonymous SNV	rs756388778			0		2053	2	2051	0.000974184
chr19	4512088	4512088	G	A	snp	exonic	PLIN4	synonymous SNV	rs772106916			1.79E-05	0	2053	2	2051	0.000974184
chr1	1849747	1849747	G	A	snp	exonic	TMEM52	synonymous SNV	rs774718185			7.20E-05		2053	2	2051	0.000974184
chr22	41077799	41077799	T	C	snp	exonic	MCHR1	nonsynonymous SNV	rs867496664					2053	2	2051	0.000974184
chr7	70255333	70255333	G	A	snp	exonic	AUTS2	nonsynonymous SNV	rs776489400			9.05E-06		2052	2	2050	0.000974659
chr1	152325990	152325990	A	G	snp	exonic	FLG2	synonymous SNV	rs140606934			0	0.0248	2051	2	2049	0.000975134
chr22	41077844	41077844	C	T	snp	exonic	MCHR1	nonsynonymous SNV	rs199555247			7.20E-05		2051	2	2049	0.000975134
chr1	10700035	10700035	C	T	snp	exonic	CASZ1	nonsynonymous SNV	rs373591122			9.01E-06		2051	2	2049	0.000975134
chr12	7077772	7077772	C	T	snp	intronic	PHB2		rs374551480			1.81E-05	6.67E-05	2051	2	2049	0.000975134
chr8	26722000	26722000	A	G	snp	exonic	ADRA1A	nonsynonymous SNV	rs766377205			0		2051	2	2049	0.000975134
chr11	57564257	57564257	C	T	snp	exonic	CTNND1	nonsynonymous SNV	rs754819160			9.08E-06		2052	2	2049	0.000975134
chr20	50407072	50407072	G	A	snp	exonic	SALL4	synonymous SNV	rs149008635	Likely benign	SALL4-Related_Spectrum_Disorders	0.0018	0.0018	2050	2	2048	0.00097561
chr11	118984875	118984875	G	C	snp	exonic	C2CD2L	nonsynonymous SNV	rs754993554			0		2050	2	2048	0.00097561
chr22	40800401	40800401	G	A	snp	exonic	SGSM3	nonsynonymous SNV	rs758178803			1.84E-05		2050	2	2048	0.00097561
chr6	348243	348243	T	C	snp	exonic	DUSP22	nonsynonymous SNV	rs765198096			0		2050	2	2048	0.00097561
chr11	1031842	1031842	G	A	snp	exonic	MUC6	synonymous SNV	rs771887021			0		2050	2	2048	0.00097561
chr22	40757515	40757515	C	T	snp	exonic	ADSL	nonsynonymous SNV	rs536254357			3.58E-05	6.67E-05	2049	2	2047	0.000976086
chr22	31059857	31059857	T	C	snp	exonic	DUSP18	nonsynonymous SNV	rs760861702			5.37E-05	6.67E-05	2049	2	2047	0.000976086
chr9	38396268	38396268	C	T	snp	exonic	ALDH1B1	nonsynonymous SNV	rs745530190			0		2048	2	2046	0.000976563
chr11	67201890	67201890	C	T	snp	exonic	RPS6KB2	nonsynonymous SNV	rs375350949			8.97E-05	0.0002	2049	2	2046	0.000976563
chr7	27135205	27135205	G	A	snp	exonic	HOXA1	synonymous SNV	rs372765755			0		2047	2	2045	0.00097704
chr20	62744643	62744643	C	T	snp	intergenic	NPBWR2;MYT1		rs752455705					2047	2	2045	0.00097704
chr16	51173544	51173544	G	A	snp	exonic	SALL1	synonymous SNV	rs776017769			2.69E-05	0	2046	2	2044	0.000977517
chr4	6374239	6374239	G	A	snp	intronic	PPP2R2C		rs201047302			0.001	0.0009	2047	2	2044	0.000977517
chr11	120998648	120998648	C	T	snp	exonic	TECTA	synonymous SNV	rs143808255			0	0	2045	2	2043	0.000977995
chr1	27105995	27105995	G	A	snp	exonic	ARID1A	nonsynonymous SNV	rs367835531			8.96E-06		2045	2	2043	0.000977995
chr7	99709454	99709454	T	C	snp	splicing	TAF6		rs369447316			8.95E-06		2045	2	2043	0.000977995
chr9	125289056	125289056	C	T	snp	exonic	OR1N1	nonsynonymous SNV	rs749285942			8.97E-06	0	2045	2	2043	0.000977995
chr2	235950095	235950095	G	A	snp	exonic	SH3BP4	nonsynonymous SNV	rs138703238			8.96E-06		2044	2	2042	0.000978474
chr22	50436091	50436091	C	T	snp	intronic	IL17REL		rs369869488			2.69E-05	6.67E-05	2044	2	2042	0.000978474
chr17	19282266	19282266	C	T	snp	exonic	MAPK7	nonsynonymous SNV	rs751958457			1.04E-05		2044	2	2042	0.000978474
chr15	75042736	75042736	C	T	snp	exonic	CYP1A2	synonymous SNV	rs369390222			0.0001	6.68E-05	2045	2	2042	0.000978474
chr17	75878197	75878197	C	T	snp	ncRNA_exonic	LINC01973		rs145895629			1.81E-05		2043	2	2041	0.000978953
chr11	1253904	1253904	C	T	snp	exonic	MUC5B	nonsynonymous SNV	rs200222877			4.72E-05	6.67E-05	2043	2	2041	0.000978953
chr3	195511803	195511803	T	C	snp	exonic	MUC4	synonymous SNV	rs751630829					2043	2	2041	0.000978953
chr18	60242293	60242293	G	A	snp	exonic	ZCCHC2	synonymous SNV	rs777503608			0		2043	2	2041	0.000978953
chr22	46930590	46930590	G	A	snp	exonic	CELSR1	synonymous SNV	rs200234410			8.97E-06	0	2042	2	2040	0.000979432
chr5	140807226	140807226	G	A	snp	ncRNA_exonic	PCDHGB8P		rs546743297					2042	2	2040	0.000979432
chr16	27353506	27353506	G	A	snp	exonic	IL4R	synonymous SNV	rs758651293			8.95E-06		2042	2	2040	0.000979432
chr16	68055951	68055951	G	A	snp	exonic	DDX28	synonymous SNV	rs777754905			2.69E-05		2042	2	2040	0.000979432
chr14	107170035	107170035	A	G	snp	intergenic	MIR7641-2;MIR5195		rs782794111			1.83E-05		2042	2	2040	0.000979432
chr19	33697156	33697156	C	T	snp	exonic	LRP3	nonsynonymous SNV	rs761159779			2.83E-05		2043	2	2040	0.000979432
chr17	21319036	21319036	C	T	snp	exonic	KCNJ12;KCNJ18	nonsynonymous SNV	rs782350621			0		2041	2	2039	0.000979912
chr3	184290594	184290594	C	T	snp	exonic	EPHB3	synonymous SNV	rs756886601			1.96E-05		2040	2	2038	0.000980392
chr5	133901865	133901865	G	A	snp	exonic	JADE2	synonymous SNV	rs780451598			0		2040	2	2038	0.000980392
chr21	47545827	47545827	G	A	snp	exonic	COL6A2	nonsynonymous SNV	rs794727418	Uncertain significance	not_specified	0		2041	2	2038	0.000980392
chr22	36900231	36900231	G	A	snp	exonic	FOXRED2	synonymous SNV	rs200758653			1.79E-05	0	2039	2	2037	0.000980873
chr1	1248247	1248247	G	A	snp	exonic	INTS11	nonsynonymous SNV	rs370145171			4.51E-05	6.67E-05	2039	2	2037	0.000980873
chr1	201779751	201779751	C	T	snp	exonic	NAV1	synonymous SNV	rs548230753			8.07E-05		2039	2	2037	0.000980873
chr3	195512917	195512917	A	T	snp	exonic	MUC4	nonsynonymous SNV	rs765323098			7.26E-05	9.65E-05	2039	2	2037	0.000980873
chr9	115652195	115652195	A	G	snp	exonic	SLC46A2	nonsynonymous SNV	rs753416271			0		2040	2	2037	0.000980873
chr4	111539637	111539637	T	C	snp	exonic	PITX2	nonsynonymous SNV	rs138163892			0.0004	0.0006	2038	2	2036	0.000981354
chr19	59021242	59021242	G	A	snp	exonic	SLC27A5	synonymous SNV	rs754141923			9.03E-06	0	2038	2	2036	0.000981354
chr1	201869019	201869019	G	A	snp	exonic	LMOD1	synonymous SNV	rs375079882			0		2037	2	2035	0.000981836
chr16	83994315	83994315	G	A	snp	exonic	OSGIN1	nonsynonymous SNV	rs775769611			8.99E-06	6.67E-05	2037	2	2035	0.000981836
chr10	95720711	95720711	G	C	snp	ncRNA_exonic	PIPSL		rs777078398			0	0	2037	2	2035	0.000981836
chr1	3396432	3396432	A	T	snp	exonic	ARHGEF16	nonsynonymous SNV	rs767411536			0		2036	2	2034	0.000982318
chr7	99021573	99021573	T	C	snp	exonic	ATP5J2-PTCD1;PTCD1	nonsynonymous SNV	rs772006873			8.97E-06		2036	2	2034	0.000982318
chr1	23191638	23191638	C	T	snp	exonic	EPHB2	synonymous SNV	rs139840326			3.65E-05	0	2035	2	2033	0.000982801
chr11	72539841	72539841	T	C	snp	intronic	ATG16L2		rs745615608			2.69E-05		2035	2	2033	0.000982801
chr1	233394101	233394101	C	T	snp	exonic	PCNX2	nonsynonymous SNV	rs753330125			5.40E-05		2035	2	2033	0.000982801
chr1	228493010	228493010	G	A	snp	exonic	OBSCN	nonsynonymous SNV	rs762401128			0.0001	0.0003	2035	2	2033	0.000982801
chr7	128766902	128766902	C	T	snp	ncRNA_exonic	LOC407835		rs771189934			0		2035	2	2033	0.000982801
chr11	418595	418595	G	A	snp	intronic	ANO9		rs768768830			0		2036	2	2033	0.000982801
chr1	37267510	37267510	C	T	snp	exonic	GRIK3	nonsynonymous SNV	rs138171690					2034	2	2032	0.000983284
chr22	41077780	41077780	A	G	snp	exonic	MCHR1	nonsynonymous SNV	rs778613505			8.95E-06		2034	2	2032	0.000983284
chr20	50407099	50407099	C	T	snp	exonic	SALL4	synonymous SNV	rs752826212			0		2033	2	2031	0.000983768
chr17	2601711	2601711	G	A	snp	exonic	CLUH	synonymous SNV	rs766214328					2033	2	2031	0.000983768
chr1	55223592	55223592	G	A	snp	exonic	PARS2	nonsynonymous SNV	rs776799505			1.79E-05		2033	2	2031	0.000983768
chr2	238277423	238277423	C	T	snp	exonic	COL6A3	synonymous SNV	rs113074898	other|Likely benign	not_specified|Collagen_VI-related_myopathy	1.79E-05	0	2032	2	2030	0.000984252
chr9	138662152	138662152	A	G	snp	exonic	KCNT1	nonsynonymous SNV	rs200173000	Benign	not_specified	0.0001	0	2032	2	2030	0.000984252
chr14	94394688	94394688	C	T	snp	exonic	FAM181A	synonymous SNV	rs369127722			0	6.68E-05	2032	2	2030	0.000984252
chr3	47043986	47043986	C	T	snp	exonic	NBEAL2	synonymous SNV	rs370969690	Uncertain significance	Gray_platelet_syndrome	5.40E-05	6.67E-05	2032	2	2030	0.000984252
chr5	175815258	175815258	G	A	snp	exonic	NOP16	nonsynonymous SNV	rs376625530			1.79E-05		2032	2	2030	0.000984252
chr5	168233443	168233443	G	A	snp	intronic	SLIT3		rs199760229			0		2031	2	2029	0.000984737
chr3	51458216	51458216	C	T	snp	exonic	DCAF1	synonymous SNV	rs553367542			0		2031	2	2029	0.000984737
chr19	5641696	5641696	C	T	snp	intronic	SAFB		rs770862829			2.69E-05		2032	2	2029	0.000984737
chr8	17486087	17486087	C	T	snp	exonic	PDGFRL	synonymous SNV	rs141210622			0.0002	0	2030	2	2028	0.000985222
chr8	145667637	145667637	A	G	snp	exonic	TONSL	nonsynonymous SNV	rs751610157			0		2030	2	2028	0.000985222
chr7	48443377	48443377	A	G	snp	exonic	ABCA13	nonsynonymous SNV	rs775870827			8.96E-06		2030	2	2028	0.000985222
chr3	138763183	138763183	C	T	snp	exonic	PRR23C	nonsynonymous SNV	rs778367269					2030	2	2028	0.000985222
chr17	80828206	80828206	G	A	snp	exonic	TBCD	synonymous SNV	rs781227791			1.80E-05		2030	2	2028	0.000985222
chr2	119988651	119988651	G	A	snp	intronic	STEAP3		rs369468585			0.0002	0.0003	2029	2	2027	0.000985707
chr3	49694803	49694803	G	A	snp	exonic	BSN	nonsynonymous SNV	rs568652610			0	0	2029	2	2027	0.000985707
chr3	113374665	113374665	G	T	snp	exonic	USF3	nonsynonymous SNV	rs757795739			0		2029	2	2027	0.000985707
chr1	21036172	21036172	C	T	snp	exonic	KIF17	synonymous SNV	rs767988905			1.79E-05		2029	2	2027	0.000985707
chr9	94486857	94486857	A	G	snp	exonic	ROR2	nonsynonymous SNV	rs775744985			1.79E-05		2029	2	2027	0.000985707
chr10	96826867	96826867	C	T	snp	intronic	CYP2C8		rs376042164				0.0001	2028	2	2026	0.000986193
chr20	57415493	57415493	C	T	snp	exonic	GNAS	nonsynonymous SNV	rs587778388	not provided	not_specified	9.10E-06		2028	2	2026	0.000986193
chr12	56531185	56531185	G	A	snp	intronic	ESYT1		rs758737441			8.99E-06		2028	2	2026	0.000986193
chr7	97823618	97823618	G	A	snp	exonic	LMTK2	nonsynonymous SNV	rs761362123			3.58E-05		2028	2	2026	0.000986193
chr5	39382845	39382845	G	A	snp	exonic	DAB2	synonymous SNV	rs764927440			2.69E-05		2028	2	2026	0.000986193
chr11	68204421	68204421	C	T	snp	exonic	LRP5	synonymous SNV	rs770762272			3.58E-05		2028	2	2026	0.000986193
chr9	21350822	21350822	A	G	snp	exonic	IFNA6	nonsynonymous SNV	rs150008995			0.0001	0.0001	2027	2	2025	0.00098668
chr16	4638272	4638272	G	A	snp	exonic	C16orf96	synonymous SNV	rs535481087			0.0001	6.66E-05	2027	2	2025	0.00098668
chr5	177569792	177569792	C	T	snp	intronic	RMND5B		rs747471689			0		2027	2	2025	0.00098668
chr1	228487883	228487883	C	T	snp	intronic	OBSCN		rs752299858			0.0001	6.67E-05	2027	2	2025	0.00098668
chr16	837723	837723	G	A	snp	exonic	RPUSD1	synonymous SNV	rs767877884			9.15E-06		2027	2	2025	0.00098668
chr17	72277978	72277978	G	A	snp	exonic	DNAI2	nonsynonymous SNV	rs776802277			0	0	2027	2	2025	0.00098668
chr13	96086183	96086183	G	T	snp	exonic	CLDN10	synonymous SNV	rs777098814			2.69E-05	6.66E-05	2027	2	2025	0.00098668
chr17	7696373	7696373	C	T	snp	exonic	DNAH2	synonymous SNV	rs372173393					2028	2	2025	0.00098668
chr19	39789177	39789177	C	T	snp	UTR3	IFNL1		rs371414686			4.50E-05	0	2026	2	2024	0.000987167
chr9	131670508	131670508	G	A	snp	exonic	LRRC8A	synonymous SNV	rs752033893			8.95E-06		2026	2	2024	0.000987167
chr15	22999563	22999563	C	T	snp	exonic	CYFIP1	synonymous SNV	rs767685425			0		2026	2	2024	0.000987167
chr12	132404685	132404685	C	T	snp	intronic	ULK1		rs368815110			5.45E-05	0.0001	2025	2	2023	0.000987654
chr19	603823	603823	C	T	snp	exonic	HCN2	synonymous SNV	rs755366627			0		2025	2	2023	0.000987654
chr22	41936719	41936719	G	A	snp	exonic	POLR3H	synonymous SNV	rs771472417			0		2025	2	2023	0.000987654
chr1	167096422	167096422	G	A	snp	exonic	DUSP27	nonsynonymous SNV	rs370847886			0		2026	2	2023	0.000987654
chr1	229730602	229730602	G	A	snp	exonic	TAF5L	synonymous SNV	rs367750184			2.69E-05		2024	2	2022	0.000988142
chr9	117848839	117848839	G	A	snp	exonic	TNC	nonsynonymous SNV	rs45481099			3.58E-05	6.69E-05	2024	2	2022	0.000988142
chr22	40800392	40800392	C	A	snp	exonic	SGSM3	nonsynonymous SNV	rs760235406					2024	2	2022	0.000988142
chr22	18022358	18022358	G	A	snp	exonic	CECR2	synonymous SNV	rs763727175			1.79E-05		2024	2	2022	0.000988142
chr19	4510939	4510939	G	A	snp	exonic	PLIN4	synonymous SNV	rs769879715			2.69E-05	0	2024	2	2022	0.000988142
chr4	77675831	77675831	G	A	snp	exonic	SHROOM3	nonsynonymous SNV	rs767026096			2.70E-05		2025	2	2022	0.000988142
chr1	1957155	1957155	G	A	snp	exonic	GABRD	nonsynonymous SNV	rs781431062			1.81E-05		2025	2	2022	0.000988142
chr19	9071084	9071084	A	G	snp	exonic	MUC16	synonymous SNV	rs768068938			7.19E-05		2023	2	2021	0.000988631
chr1	201779752	201779752	G	A	snp	exonic	NAV1	nonsynonymous SNV	rs369401084			8.97E-06	0	2022	2	2020	0.00098912
chr19	10395039	10395039	A	G	snp	intronic	ICAM1		rs750107806			9.17E-06		2022	2	2020	0.00098912
chr22	18022203	18022203	A	G	snp	exonic	CECR2	nonsynonymous SNV	rs754535050			8.06E-05		2022	2	2020	0.00098912
chr11	65413803	65413803	C	T	snp	exonic	SIPA1	synonymous SNV	rs777449366			8.95E-06		2023	2	2020	0.00098912
chr2	3196229	3196229	G	A	snp	exonic	EIPR1	synonymous SNV	rs376091257			0.0001	0	2021	2	2019	0.000989609
chr19	2790609	2790609	C	T	snp	exonic	THOP1	synonymous SNV	rs529268870			1.05E-05	0	2020	2	2018	0.000990099
chr4	47605500	47605500	C	T	snp	exonic	CORIN	nonsynonymous SNV	rs757102291			1.80E-05		2020	2	2018	0.000990099
chr16	1720692	1720692	G	A	snp	exonic	CRAMP1	nonsynonymous SNV	rs771116293			8.95E-06		2020	2	2018	0.000990099
chr2	149247320	149247320	C	T	snp	exonic	MBD5	synonymous SNV	rs773296595			0		2020	2	2018	0.000990099
chr7	938549	938549	C	T	snp	UTR3	ADAP1		rs779821642					2020	2	2018	0.000990099
chr17	40459688	40459688	G	A	snp	exonic	STAT5A	nonsynonymous SNV	rs780900178			0		2020	2	2018	0.000990099
chr16	30365211	30365211	C	T	snp	intronic	CD2BP2		rs753958656			0		2021	2	2018	0.000990099
chr20	62597885	62597885	G	A	snp	exonic	ZNF512B	nonsynonymous SNV	rs760852981			0		3029	3	3026	0.000990426
chr7	150934749	150934749	G	A	snp	exonic	CHPF2	nonsynonymous SNV	rs140251502			0.0002	0.0004	2019	2	2017	0.000990589
chr1	152281461	152281461	G	A	snp	exonic	FLG	synonymous SNV	rs3126078			0.0001	0	2019	2	2017	0.000990589
chr6	116579889	116579889	G	A	snp	UTR5	DSE		rs774550868			8.96E-06	0	2019	2	2017	0.000990589
chr4	39448923	39448923	C	A	snp	exonic	KLB	synonymous SNV	rs765965692			0		2020	2	2017	0.000990589
chr11	68153967	68153967	C	T	snp	exonic	LRP5	nonsynonymous SNV	rs201320326			0.0004	0	2018	2	2016	0.00099108
chr7	540736	540736	C	T	snp	intronic	PDGFA		rs375542585			0.0024	0.0021	2018	2	2016	0.00099108
chr20	44592217	44592217	G	A	snp	exonic	ZNF335	synonymous SNV	rs775897215			8.95E-06		2018	2	2016	0.00099108
chr2	3391475	3391475	G	A	snp	exonic	TRAPPC12	synonymous SNV	rs776714649			1.12E-05		2018	2	2016	0.00099108
chr2	3196226	3196226	G	A	snp	exonic	EIPR1	synonymous SNV	rs371238368			8.99E-06	6.67E-05	2016	2	2014	0.000992063
chr17	650771	650771	T	C	snp	exonic	GEMIN4	nonsynonymous SNV	rs372611065			0	0	2016	2	2014	0.000992063
chr5	140208858	140208858	T	C	snp	exonic	PCDHA6	synonymous SNV	rs393935			8.95E-06		2016	2	2014	0.000992063
chr5	178454518	178454518	C	T	snp	exonic	ZNF879	synonymous SNV	rs745915589			2.69E-05	6.67E-05	2016	2	2014	0.000992063
chr17	73096402	73096402	G	A	snp	exonic	SLC16A5	nonsynonymous SNV	rs778534110					2016	2	2014	0.000992063
chr7	100680473	100680473	C	A	snp	exonic	MUC17	nonsynonymous SNV	rs780855970			0	0	2016	2	2014	0.000992063
chr5	140250062	140250062	G	A	snp	exonic	PCDHA11	synonymous SNV	rs781992966			0		2016	2	2014	0.000992063
chr9	136405763	136405763	T	C	snp	exonic	ADAMTSL2	synonymous SNV	rs376182577			2.69E-05	0.0001	2015	2	2013	0.000992556
chr2	25043615	25043615	G	A	snp	exonic	ADCY3	nonsynonymous SNV	rs537915767			8.96E-06		2015	2	2013	0.000992556
chr17	43101905	43101905	G	A	snp	exonic	DCAKD	nonsynonymous SNV	rs767783860			0		2015	2	2013	0.000992556
chr20	5282996	5282996	G	A	snp	exonic	PROKR2	nonsynonymous SNV	rs773923265			3.58E-05		2015	2	2013	0.000992556
chr17	43101960	43101960	C	T	snp	exonic	DCAKD	synonymous SNV	rs754662396			0.0001	6.68E-05	2016	2	2013	0.000992556
chr17	17697994	17697994	A	G	snp	exonic	RAI1	nonsynonymous SNV	rs758517565			0		2016	2	2013	0.000992556
chr7	150934751	150934751	C	T	snp	exonic	CHPF2	nonsynonymous SNV	rs372645185			1.80E-05		2014	2	2012	0.000993049
chr9	139973058	139973058	G	A	snp	exonic	UAP1L1	nonsynonymous SNV	rs766437607			8.99E-06		2014	2	2012	0.000993049
chr9	131010943	131010943	C	T	snp	exonic	DNM1	unknown	rs777360250	Likely benign	not_specified	0		2014	2	2012	0.000993049
chr12	57397097	57397097	G	A	snp	exonic	ZBTB39	synonymous SNV	rs570006960			9.02E-06	0	2013	2	2011	0.000993542
chr16	27786289	27786289	G	A	snp	exonic	KIAA0556	nonsynonymous SNV	rs61744194			8.97E-06	0	2013	2	2011	0.000993542
chr20	57430119	57430119	G	A	snp	exonic	GNAS	nonsynonymous SNV	rs754892188			0		2013	2	2011	0.000993542
chr17	41852247	41852247	G	A	snp	exonic	DUSP3	nonsynonymous SNV	rs757849378			2.69E-05		2013	2	2011	0.000993542
chr3	122843247	122843247	G	A	snp	intronic	PDIA5		rs373756686				0	2012	2	2010	0.000994036
chr22	18022310	18022310	A	G	snp	exonic	CECR2	synonymous SNV	rs768824476			0		2012	2	2010	0.000994036
chr1	154961155	154961155	G	A	snp	exonic	FLAD1	stopgain	rs765694508			0		2013	2	2010	0.000994036
chr10	106976777	106976777	C	T	snp	exonic	SORCS3	synonymous SNV	rs143982937			5.37E-05	0	2011	2	2009	0.00099453
chr1	110884129	110884129	C	T	snp	exonic	RBM15	nonsynonymous SNV	rs752048258					2010	2	2008	0.000995025
chr1	53676847	53676847	A	T	snp	exonic	CPT2	nonsynonymous SNV	rs763340721					2010	2	2008	0.000995025
chr14	106725395	106725395	T	A	snp	intergenic	ADAM6;LINC00226		rs782026132			0		2010	2	2008	0.000995025
chr10	90768611	90768611	C	T	snp	intronic	FAS		rs376369826			4.48E-05	6.66E-05	4020	4	4016	0.000995025
chr19	52249666	52249666	G	A	snp	exonic	FPR1	synonymous SNV	rs747540806			0.0001	0.0001	2009	2	2007	0.00099552
chr11	66372811	66372811	A	G	snp	exonic	CCS	nonsynonymous SNV	rs755199781			0		2009	2	2007	0.00099552
chr11	64884423	64884423	C	T	snp	exonic	ZNHIT2	nonsynonymous SNV	rs775351354			0		2009	2	2007	0.00099552
chr19	46879748	46879748	G	A	snp	exonic	PPP5C	nonsynonymous SNV	rs146574618			6.27E-05		2008	2	2006	0.000996016
chr13	88329273	88329273	C	A	snp	exonic	SLITRK5	nonsynonymous SNV	rs746415471			8.95E-06		2008	2	2006	0.000996016
chr15	43813797	43813797	C	A	snp	exonic	MAP1A	synonymous SNV	rs758390056					2008	2	2006	0.000996016
chr19	44116430	44116430	C	T	snp	exonic	SRRM5	nonsynonymous SNV	rs760171652			1.75E-05		2008	2	2006	0.000996016
chr19	13869956	13869956	G	A	snp	exonic	CCDC130	nonsynonymous SNV	rs763221273			9.07E-06	0.0002	2008	2	2006	0.000996016
chr3	69230228	69230228	G	A	snp	exonic	FRMD4B	synonymous SNV	rs764522166			8.95E-06		2008	2	2006	0.000996016
chr19	17692189	17692189	G	A	snp	exonic	COLGALT1	nonsynonymous SNV	rs769808117			8.97E-06		2008	2	2006	0.000996016
chr1	149859140	149859140	C	T	snp	exonic	HIST2H2AB	synonymous SNV	rs782695523			8.95E-06		2008	2	2006	0.000996016
chr7	100676683	100676683	T	C	snp	exonic	MUC17	synonymous SNV	rs151192830			0.0014	0.0013	2007	2	2005	0.000996512
chr18	13884925	13884925	A	G	snp	exonic	MC2R	nonsynonymous SNV	rs764338580			1.79E-05		2007	2	2005	0.000996512
chr19	31769996	31769996	C	T	snp	exonic	TSHZ3	nonsynonymous SNV	rs765055013			8.97E-06		2008	2	2005	0.000996512
chr5	140865005	140865005	C	T	snp	exonic	PCDHGC4	nonsynonymous SNV	rs143779180			3.59E-05		2006	2	2004	0.000997009
chr8	126448518	126448518	C	T	snp	exonic	TRIB1	synonymous SNV	rs201838912			0.0002	6.67E-05	2006	2	2004	0.000997009
chr1	46657952	46657952	A	G	snp	intronic	POMGNT1		rs753365123			8.95E-06		2006	2	2004	0.000997009
chr1	152191346	152191346	C	T	snp	exonic	HRNR	nonsynonymous SNV	rs755328752			0		2006	2	2004	0.000997009
chr18	72999603	72999603	C	T	snp	exonic	TSHZ1	synonymous SNV	rs762347831			3.58E-05	0	2006	2	2004	0.000997009
chr1	245848931	245848931	C	T	snp	exonic	KIF26B	synonymous SNV	rs765860272			8.99E-06		2006	2	2004	0.000997009
chr19	7977229	7977229	G	A	snp	exonic	MAP2K7	synonymous SNV	rs766586869			4.50E-05	6.68E-05	2006	2	2004	0.000997009
chr15	86311743	86311743	G	A	snp	exonic	KLHL25	synonymous SNV	rs768761766			4.48E-05	0	2006	2	2004	0.000997009
chr1	230910365	230910365	A	T	snp	exonic	CAPN9	nonsynonymous SNV	rs748009160			3.58E-05		2005	2	2003	0.000997506
chr19	44117682	44117682	C	T	snp	exonic	SRRM5	nonsynonymous SNV	rs138622320			0.0004	0.0009	2004	2	2002	0.000998004
chr2	44099307	44099307	G	A	snp	intronic	ABCG8		rs371876826			0		2004	2	2002	0.000998004
chr9	125289222	125289222	C	T	snp	exonic	OR1N1	synonymous SNV	rs142821264			0	0	2003	2	2001	0.000998502
chr1	23191642	23191642	G	A	snp	exonic	EPHB2	nonsynonymous SNV	rs149014913			4.56E-05	6.67E-05	2003	2	2001	0.000998502
chr22	40803454	40803454	G	A	snp	exonic	SGSM3	nonsynonymous SNV	rs199635422			2.71E-05		2003	2	2001	0.000998502
chr19	17692188	17692188	C	T	snp	exonic	COLGALT1	nonsynonymous SNV	rs535742636			8.97E-05		2003	2	2001	0.000998502
chr17	72920918	72920918	C	T	snp	exonic	OTOP2	nonsynonymous SNV	rs772425018			0		2003	2	2001	0.000998502
chr7	131925860	131925860	G	A	snp	exonic	PLXNA4	synonymous SNV	rs774321231			1.80E-05		2003	2	2001	0.000998502
chr16	830603	830603	G	A	snp	intergenic	MIR662;RPUSD1		rs369552643				0	2002	2	2000	0.000999001
chr15	22440664	22440664	G	A	snp	intergenic	OR4N3P;IGHV1OR15-1		rs544414802				0.0001	2002	2	2000	0.000999001
chr12	52467655	52467655	G	A	snp	exonic	ATG101	nonsynonymous SNV	rs565732645			0	0	2002	2	2000	0.000999001
chr5	156816400	156816400	C	T	snp	exonic	CYFIP2	synonymous SNV	rs760885047			3.64E-05		2002	2	2000	0.000999001
chr21	41711236	41711236	C	T	snp	exonic	DSCAM	synonymous SNV	rs768971328					2002	2	2000	0.000999001
chr7	131195804	131195804	G	T	snp	exonic	PODXL	nonsynonymous SNV	rs375402514			0		2001	2	1999	0.0009995
chr14	21793180	21793180	C	T	snp	exonic	RPGRIP1	synonymous SNV	rs376086719			8.96E-05	0.0002	2001	2	1999	0.0009995
chr17	39919337	39919337	G	A	snp	exonic	JUP	synonymous SNV	rs569897651					2001	2	1999	0.0009995
chr9	127572338	127572338	G	A	snp	exonic	OLFML2A	nonsynonymous SNV	rs747666018			0		2001	2	1999	0.0009995
chr9	127572304	127572304	C	T	snp	exonic	OLFML2A	synonymous SNV	rs116925909			0.0015	0.0015	2000	2	1998	0.001
chr19	14034537	14034537	G	A	snp	exonic	CC2D1A	nonsynonymous SNV	rs761789432			8.95E-06		2000	2	1998	0.001
chr19	39914816	39914816	C	T	snp	exonic	PLEKHG2	nonsynonymous SNV	rs772894496			0		2000	2	1998	0.001
chr17	18087835	18087835	G	A	snp	exonic	ALKBH5	nonsynonymous SNV	rs201845081			0.0002	0.0003	1999	2	1997	0.0010005
chr15	90451588	90451588	G	A	snp	exonic	ARPIN;C15orf38-AP3S2	synonymous SNV	rs531934995			8.95E-06		1999	2	1997	0.0010005
chr19	41122869	41122869	C	T	snp	exonic	LTBP4	unknown	rs552502271			1.79E-05		1999	2	1997	0.0010005
chr2	75107702	75107702	C	T	snp	intronic	HK2		rs564594916			1.84E-05	0	1999	2	1997	0.0010005
chr17	17699744	17699744	G	A	snp	exonic	RAI1	nonsynonymous SNV	rs761985540			1.81E-05		2000	2	1997	0.0010005
chr10	135012026	135012026	G	A	snp	intronic	KNDC1		rs752669064			1.00E-05	6.67E-05	1998	2	1996	0.001001001
chr19	31769877	31769877	C	T	snp	exonic	TSHZ3	synonymous SNV	rs763611766			0		1998	2	1996	0.001001001
chr3	51929108	51929108	C	T	snp	exonic	IQCF1	nonsynonymous SNV	rs769127993			3.58E-05		1998	2	1996	0.001001001
chr1	161953892	161953892	G	T	snp	exonic	OLFML2B	nonsynonymous SNV	rs778127779					1998	2	1996	0.001001001
chr3	51746637	51746637	G	A	snp	exonic	GRM2	nonsynonymous SNV	rs372298669			8.96E-06		1999	2	1996	0.001001001
chr1	891528	891528	C	T	snp	exonic	NOC2L	nonsynonymous SNV	rs771187906			8.96E-06		1999	2	1996	0.001001001
chr19	10335008	10335008	G	A	snp	exonic	S1PR2	synonymous SNV	rs548754912			0	0	1997	2	1995	0.001001502
chr9	140657239	140657239	C	A	snp	exonic	EHMT1	nonsynonymous SNV	rs752162672			8.06E-05		1997	2	1995	0.001001502
chr4	41983963	41983963	A	G	snp	exonic	DCAF4L1	nonsynonymous SNV	rs761397871			0		1997	2	1995	0.001001502
chr3	140401852	140401852	G	A	snp	exonic	TRIM42	nonsynonymous SNV	rs770530157					1997	2	1995	0.001001502
chr16	89804494	89804494	G	A	snp	exonic	ZNF276	nonsynonymous SNV	rs780532307			2.69E-05	0	1997	2	1995	0.001001502
chr3	126386156	126386156	C	T	snp	ncRNA_exonic	NUP210P1		rs539721417			8.98E-06		1998	2	1995	0.001001502
chr9	33625096	33625096	C	T	snp	ncRNA_exonic	ANXA2P2		rs1065565			6.27E-05	6.66E-05	1996	2	1994	0.001002004
chr12	131471698	131471698	C	T	snp	exonic	ADGRD1	synonymous SNV	rs376910160			2.69E-05		1996	2	1994	0.001002004
chr2	56420144	56420144	G	A	snp	exonic	CCDC85A	nonsynonymous SNV	rs775195592			0		1996	2	1994	0.001002004
chr20	62366816	62366816	C	T	snp	exonic	ZGPAT	nonsynonymous SNV	rs561163473			0	6.67E-05	1995	2	1993	0.001002506
chr1	32829429	32829429	G	A	snp	exonic	TSSK3	nonsynonymous SNV	rs745576149			0	0	1995	2	1993	0.001002506
chrX	3573284	3573284	C	T	snp	exonic	PRKX	nonsynonymous SNV	rs772010391			3.74E-05		1995	2	1993	0.001002506
chr9	140777311	140777311	T	C	snp	exonic	CACNA1B	nonsynonymous SNV	rs778123444			0		1995	2	1993	0.001002506
chr3	113374627	113374627	G	A	snp	exonic	USF3	nonsynonymous SNV	rs184254184			0.0002	0.0003	1994	2	1992	0.001003009
chr1	229730597	229730597	C	T	snp	exonic	TAF5L	nonsynonymous SNV	rs371365036			0	6.67E-05	1994	2	1992	0.001003009
chr19	5456031	5456031	C	T	snp	exonic	ZNRF4	nonsynonymous SNV	rs372968964			1.83E-05	0	1994	2	1992	0.001003009
chr17	21319012	21319012	C	A	snp	exonic	KCNJ12;KCNJ18	nonsynonymous SNV	rs538899724			0		1994	2	1992	0.001003009
chr7	148800956	148800956	C	T	snp	exonic	ZNF425	synonymous SNV	rs746281267			2.69E-05		1994	2	1992	0.001003009
chr8	2092645	2092645	A	G	snp	exonic	MYOM2	nonsynonymous SNV	rs747542102			8.95E-06		1994	2	1992	0.001003009
chr9	127572281	127572281	G	A	snp	exonic	OLFML2A	nonsynonymous SNV	rs747659132			0		1994	2	1992	0.001003009
chr16	2816263	2816263	C	T	snp	exonic	SRRM2	nonsynonymous SNV	rs748024471			1.79E-05		1994	2	1992	0.001003009
chr16	67292274	67292274	C	T	snp	exonic	SLC9A5	nonsynonymous SNV	rs762992042			0		1994	2	1992	0.001003009
chr19	57954755	57954755	C	A	snp	exonic	ZNF749	nonsynonymous SNV	rs753071107			8.96E-06		1995	2	1992	0.001003009
chr3	48501920	48501920	C	T	snp	exonic	ATRIP	synonymous SNV	rs111344961			0.0001	0.0003	1993	2	1991	0.001003512
chr1	229730632	229730632	T	C	snp	exonic	TAF5L	synonymous SNV	rs145182309			7.17E-05	6.67E-05	1993	2	1991	0.001003512
chr4	41984122	41984122	C	T	snp	exonic	DCAF4L1	stopgain	rs547538687			8.97E-06		1993	2	1991	0.001003512
chr16	67292280	67292280	G	A	snp	exonic	SLC9A5	nonsynonymous SNV	rs761883254			1.79E-05		1993	2	1991	0.001003512
chr15	49255155	49255155	C	T	snp	exonic	SHC4	nonsynonymous SNV	rs777019738			9.20E-06		1993	2	1991	0.001003512
chr15	25331776	25331776	T	C	snp	ncRNA_intronic	SNHG14		rs777923667			0		1993	2	1991	0.001003512
chr19	56196876	56196876	G	A	snp	exonic	EPN1	nonsynonymous SNV	rs779402273			9.06E-06	6.67E-05	1993	2	1991	0.001003512
chr5	115783386	115783386	G	A	snp	exonic	SEMA6A	synonymous SNV	rs372279326			8.07E-05	6.67E-05	1992	2	1990	0.001004016
chr19	59021230	59021230	G	A	snp	exonic	SLC27A5	synonymous SNV	rs377653125			3.62E-05	0	1992	2	1990	0.001004016
chr8	146278622	146278622	C	T	snp	intronic	C8orf33		rs560161101				0.0002	1992	2	1990	0.001004016
chr1	16475254	16475254	C	T	snp	exonic	EPHA2	nonsynonymous SNV	rs754447639			1.79E-05		1992	2	1990	0.001004016
chr5	140810888	140810888	G	T	snp	exonic	PCDHGA12	nonsynonymous SNV	rs112186927			1.79E-05	0.0001	1991	2	1989	0.00100452
chr17	62022733	62022733	G	A	snp	exonic	SCN4A	nonsynonymous SNV	rs757364234			9.04E-06		1991	2	1989	0.00100452
chr19	54803070	54803070	G	A	snp	exonic	LILRA3	nonsynonymous SNV	rs777814607			4.71E-05		1991	2	1989	0.00100452
chr12	130926728	130926728	C	T	snp	exonic	RIMBP2	nonsynonymous SNV	rs748222765			0		1992	2	1989	0.00100452
chr5	140856225	140856225	C	A	snp	exonic	PCDHGC3	nonsynonymous SNV	rs182518072					1990	2	1988	0.001005025
chr20	18123475	18123475	T	C	snp	exonic	KAT14	synonymous SNV	rs763740306			9.13E-06		1990	2	1988	0.001005025
chr20	5283045	5283045	G	A	snp	exonic	PROKR2	nonsynonymous SNV	rs146729363			0		1991	2	1988	0.001005025
chr7	97822801	97822801	G	A	snp	exonic	LMTK2	synonymous SNV	rs146056893			1.79E-05	6.68E-05	1989	2	1987	0.00100553
chr21	33371071	33371071	G	A	snp	exonic	HUNK	synonymous SNV	rs370235358			0	0	1989	2	1987	0.00100553
chr21	47552400	47552400	C	T	snp	exonic	COL6A2	synonymous SNV	rs376362856			2.85E-05		1989	2	1987	0.00100553
chr22	37263496	37263496	T	C	snp	exonic	NCF4	nonsynonymous SNV	rs747202725			8.95E-06		1989	2	1987	0.00100553
chr19	45322707	45322707	C	T	snp	exonic	BCAM	synonymous SNV	rs749844885			0		1989	2	1987	0.00100553
chr7	131925916	131925916	C	T	snp	exonic	PLXNA4	nonsynonymous SNV	rs112682233			0.0037	0.0029	1988	2	1986	0.001006036
chr1	160011832	160011832	G	A	snp	exonic	KCNJ10	nonsynonymous SNV	rs137853069	Pathogenic	SeSAME_syndrome			1988	2	1986	0.001006036
chr11	67201781	67201781	C	T	snp	intronic	RPS6KB2		rs192602405			0.0018	0.0017	1988	2	1986	0.001006036
chr3	124731628	124731628	C	A	snp	exonic	HEG1	nonsynonymous SNV	rs200456004			0	0	1988	2	1986	0.001006036
chr3	8809239	8809239	G	T	snp	exonic	OXTR	nonsynonymous SNV	rs544737187			9.18E-06		1988	2	1986	0.001006036
chr1	233394117	233394117	T	C	snp	exonic	PCNX2	synonymous SNV	rs572135239			0		1988	2	1986	0.001006036
chr1	152282658	152282658	G	A	snp	exonic	FLG	synonymous SNV	rs766533034			8.95E-06		1988	2	1986	0.001006036
chr19	10398564	10398564	G	A	snp	intronic	ICAM4		rs771977233			0		1988	2	1986	0.001006036
chr19	45375273	45375273	C	T	snp	exonic	NECTIN2	synonymous SNV	rs777165380			3.58E-05	6.67E-05	1988	2	1986	0.001006036
chr7	2472852	2472852	G	A	snp	exonic	CHST12	nonsynonymous SNV	rs775222372			1.82E-05		1987	2	1985	0.001006543
chr2	242742903	242742903	G	A	snp	exonic	GAL3ST2	synonymous SNV	rs780590626			1.84E-05		1987	2	1985	0.001006543
chr20	3687100	3687100	C	T	snp	exonic	SIGLEC1	synonymous SNV	rs781137290			1.79E-05		1987	2	1985	0.001006543
chr10	3161034	3161034	C	T	snp	exonic	PFKP	synonymous SNV	rs370592480			3.59E-05	6.66E-05	1986	2	1984	0.001007049
chr10	135204631	135204631	T	G	snp	intronic	PAOX		rs532914051					1986	2	1984	0.001007049
chr17	72310368	72310368	G	A	snp	UTR3	DNAI2		rs751438337	Uncertain significance	not_specified	0.0002	6.67E-05	1986	2	1984	0.001007049
chr1	33612989	33612989	C	T	snp	exonic	TRIM62	nonsynonymous SNV	rs760627223			1.79E-05		1986	2	1984	0.001007049
chr7	21943912	21943912	G	T	snp	intronic	CDCA7L		rs752947146			0		1987	2	1984	0.001007049
chr11	68575030	68575030	C	T	snp	exonic	CPT1A	nonsynonymous SNV	rs150350585			8.96E-06	0.0001	1985	2	1983	0.001007557
chr16	29810786	29810786	C	A	snp	exonic	KIF22	synonymous SNV	rs774113015			8.99E-06		1985	2	1983	0.001007557
chr11	64084943	64084943	C	A	snp	exonic	TRMT112	nonsynonymous SNV	rs776373517			0		1985	2	1983	0.001007557
chr17	51901299	51901299	A	G	snp	exonic	KIF2B	nonsynonymous SNV	rs779062258			0		1985	2	1983	0.001007557
chr3	48698189	48698189	G	A	snp	exonic	CELSR3	nonsynonymous SNV	rs779915965			0		1985	2	1983	0.001007557
chr19	12776316	12776316	C	T	snp	exonic	MAN2B1	nonsynonymous SNV	rs148724402			1.79E-05	0	1984	2	1982	0.001008065
chr15	22466395	22466395	C	A	snp	ncRNA_intronic	IGHV1OR15-3;LOC642131		rs767176129			0		1984	2	1982	0.001008065
chr2	131520906	131520906	G	A	snp	exonic	AMER3	nonsynonymous SNV	rs773935080			8.98E-06		1984	2	1982	0.001008065
chr1	152327442	152327442	T	A	snp	exonic	FLG2	synonymous SNV	rs761774968			0	0.0002	2976	3	2973	0.001008065
chr19	8174220	8174220	G	T	snp	exonic	FBN3	synonymous SNV	rs73007464			8.95E-06		1983	2	1981	0.001008573
chr1	152326056	152326056	G	A	snp	exonic	FLG2	synonymous SNV	rs759388713			0		1983	2	1981	0.001008573
chr17	685552	685552	C	T	snp	UTR5	GLOD4		rs759618173			0		1983	2	1981	0.001008573
chr19	42852473	42852473	C	T	snp	exonic	MEGF8	nonsynonymous SNV	rs764350769			1.81E-05		1983	2	1981	0.001008573
chr15	63918171	63918171	G	A	snp	intronic	HERC1		rs772690412			4.98E-05		1983	2	1981	0.001008573
chr16	2817105	2817105	C	T	snp	exonic	SRRM2	synonymous SNV	rs372395764			0.0002	6.67E-05	1982	2	1980	0.001009082
chr1	7724144	7724144	C	T	snp	exonic	CAMTA1	nonsynonymous SNV	rs539776304			0		1982	2	1980	0.001009082
chr17	43101917	43101917	T	C	snp	exonic	DCAKD	nonsynonymous SNV	rs755958196			1.80E-05		1982	2	1980	0.001009082
chr1	65312338	65312338	C	T	snp	exonic	JAK1	nonsynonymous SNV	rs760966244			8.97E-06	6.66E-05	1982	2	1980	0.001009082
chr3	112991426	112991426	C	T	snp	exonic	BOC	synonymous SNV	rs771960802			0		1982	2	1980	0.001009082
chr19	8808006	8808006	C	T	snp	exonic	ACTL9	nonsynonymous SNV	rs782467831			0		1982	2	1980	0.001009082
chr18	44260346	44260346	C	T	snp	exonic	ST8SIA5	nonsynonymous SNV	rs200142549			9.00E-06		2973	3	2970	0.001009082
chr11	68153977	68153977	C	T	snp	exonic	LRP5	synonymous SNV	rs142055640			4.48E-05	6.68E-05	1981	2	1979	0.001009591
chr2	47277168	47277168	C	T	snp	exonic	TTC7A	nonsynonymous SNV	rs561491427			0		1981	2	1979	0.001009591
chr19	57839876	57839876	A	G	snp	exonic	ZNF543	nonsynonymous SNV	rs754617668			2.69E-05		1981	2	1979	0.001009591
chr9	140086760	140086760	G	A	snp	exonic	TPRN	nonsynonymous SNV	rs746314611			9.08E-06	6.68E-05	1980	2	1978	0.001010101
chr15	75942365	75942365	C	T	snp	exonic	SNX33	nonsynonymous SNV	rs749223606			0		1980	2	1978	0.001010101
chr4	37636722	37636722	C	T	snp	exonic	RELL1	nonsynonymous SNV	rs746504007			1.79E-05		1979	2	1977	0.001010611
chr16	67697449	67697449	G	A	snp	exonic	ENKD1	nonsynonymous SNV	rs748373274			9.23E-06	0	1979	2	1977	0.001010611
chrX	11783734	11783734	C	T	snp	exonic	MSL3	nonsynonymous SNV	rs780120545			1.25E-05		1980	2	1977	0.001010611
chr10	3161041	3161041	C	A	snp	exonic	PFKP	nonsynonymous SNV	rs746642921			0		1978	2	1976	0.001011122
chr1	245848984	245848984	G	A	snp	exonic	KIF26B	nonsynonymous SNV	rs747266335			9.10E-06		1978	2	1976	0.001011122
chr1	110051034	110051034	C	T	snp	exonic	AMIGO1	synonymous SNV	rs758022753			2.69E-05		1978	2	1976	0.001011122
chr2	95542420	95542420	C	T	snp	exonic	TEKT4	nonsynonymous SNV	rs782667279			0		1978	2	1976	0.001011122
chr7	99754158	99754158	C	T	snp	exonic	C7orf43	nonsynonymous SNV	rs751542273			8.99E-06		1979	2	1976	0.001011122
chr7	938673	938673	C	T	snp	exonic	ADAP1	nonsynonymous SNV	rs762149014			0	0	1979	2	1976	0.001011122
chr1	109795209	109795209	G	A	snp	exonic	CELSR2	synonymous SNV	rs752733978			0		2966	3	2963	0.001011463
chr19	46890384	46890384	C	T	snp	exonic	PPP5C	synonymous SNV	rs138238332			8.95E-06		1977	2	1975	0.001011634
chr19	43967339	43967339	G	A	snp	exonic	LYPD3	synonymous SNV	rs551658300			8.96E-06	6.67E-05	1977	2	1975	0.001011634
chr9	139820287	139820287	A	G	snp	exonic	TRAF2	synonymous SNV	rs753528354			0		1977	2	1975	0.001011634
chr17	8092629	8092629	C	T	snp	exonic	BORCS6	nonsynonymous SNV	rs762597553					1977	2	1975	0.001011634
chr1	11199607	11199607	C	T	snp	exonic	MTOR	nonsynonymous SNV	rs771659197			0		1978	2	1975	0.001011634
chr1	62190689	62190689	-	C	ins	exonic	TM2D1	frameshift insertion	rs781411504			0		1979	2	1975	0.001011634
chr6	41773729	41773729	G	A	snp	exonic	USP49	synonymous SNV	rs146116518			0	0	1976	2	1974	0.001012146
chr2	56420201	56420201	G	A	snp	exonic	CCDC85A	nonsynonymous SNV	rs200937623			0.0001		1976	2	1974	0.001012146
chr20	5282965	5282965	G	A	snp	exonic	PROKR2	synonymous SNV	rs747977707			2.69E-05		1976	2	1974	0.001012146
chr11	67201787	67201787	G	A	snp	intronic	RPS6KB2		rs772551319			0		1976	2	1974	0.001012146
chr1	212799401	212799401	C	T	snp	exonic	FAM71A	synonymous SNV	rs780623727			1.80E-05	6.67E-05	1976	2	1974	0.001012146
chr9	129595454	129595454	C	T	snp	exonic	ZBTB43	synonymous SNV	rs142613386			1.80E-05		1975	2	1973	0.001012658
chr12	131471744	131471744	C	T	snp	exonic	ADGRD1	nonsynonymous SNV	rs146310036			3.58E-05	0	1975	2	1973	0.001012658
chr17	56084442	56084442	G	A	snp	exonic	SRSF1	synonymous SNV	rs201701461					1975	2	1973	0.001012658
chr16	72138498	72138498	C	A	snp	exonic	DHX38	synonymous SNV	rs758416656			1.79E-05		1975	2	1973	0.001012658
chr9	127572350	127572350	C	T	snp	exonic	OLFML2A	nonsynonymous SNV	rs776051451			8.99E-06		1975	2	1973	0.001012658
chr19	4891379	4891379	C	A	snp	exonic	ARRDC5	synonymous SNV	rs200197728			0.0003	0.0005	1974	2	1972	0.001013171
chr8	2092646	2092646	A	G	snp	exonic	MYOM2	nonsynonymous SNV	rs201486631			0.0002	0.0002	1974	2	1972	0.001013171
chr11	64029045	64029045	C	A	snp	intronic	PLCB3		rs368327444					1974	2	1972	0.001013171
chr5	150901389	150901389	C	T	snp	exonic	FAT2	nonsynonymous SNV	rs755118559			0		1974	2	1972	0.001013171
chr2	235950086	235950086	G	A	snp	exonic	SH3BP4	nonsynonymous SNV	rs765716211			8.96E-06		1974	2	1972	0.001013171
chr4	59403	59403	G	A	snp	exonic	ZNF595;ZNF718	synonymous SNV	rs774472485			0		1974	2	1972	0.001013171
chr21	47423633	47423633	G	A	snp	exonic	COL6A1	synonymous SNV	rs148561616	Likely benign|Uncertain significance	Collagen_VI-related_myopathy|not_specified	5.46E-05	6.67E-05	1975	2	1972	0.001013171
chr10	104595073	104595073	C	T	snp	exonic	CYP17A1	nonsynonymous SNV	rs104894154	Pathogenic	Complete_combined_17-alpha-hydroxylase/17\x2c20-lyase_deficiency	3.58E-05	6.67E-05	1973	2	1971	0.001013685
chr19	43376053	43376053	C	A	snp	exonic	PSG1	nonsynonymous SNV	rs375893432			0		1973	2	1971	0.001013685
chr10	7621700	7621700	C	T	snp	intronic	ITIH5		rs747943369			0	0	1973	2	1971	0.001013685
chr19	9059831	9059831	G	A	snp	exonic	MUC16	synonymous SNV	rs751333557			0		1972	2	1970	0.001014199
chr20	62366820	62366820	C	T	snp	exonic	ZGPAT	nonsynonymous SNV	rs757648210			2.22E-05		1972	2	1970	0.001014199
chr14	74759435	74759435	C	A	snp	intronic	ABCD4		rs766146661			0		1972	2	1970	0.001014199
chr15	79748815	79748815	G	A	snp	exonic	KIAA1024	nonsynonymous SNV	rs779048416			8.96E-06		1972	2	1970	0.001014199
chr15	42279460	42279460	G	A	snp	exonic	PLA2G4E	nonsynonymous SNV	rs370317501			8.95E-06	0	1971	2	1969	0.001014713
chr19	9084438	9084438	G	A	snp	exonic	MUC16	synonymous SNV	rs756578965			0		1971	2	1969	0.001014713
chr11	69462802	69462802	G	A	snp	exonic	CCND1	synonymous SNV	rs761742200			2.69E-05	0	1971	2	1969	0.001014713
chr22	42089760	42089760	A	G	snp	exonic	C22orf46	synonymous SNV	rs772745840			0.0001	0	1971	2	1969	0.001014713
chr1	37267503	37267503	G	A	snp	exonic	GRIK3	synonymous SNV	rs191042265			1.80E-05	6.67E-05	1970	2	1968	0.001015228
chr17	72301566	72301566	C	A	snp	exonic	DNAI2	nonsynonymous SNV	rs368602173					1970	2	1968	0.001015228
chr9	127119089	127119089	G	A	snp	exonic	PSMB7	synonymous SNV	rs746802825			9.13E-06		1970	2	1968	0.001015228
chr16	56370738	56370738	G	A	snp	exonic	GNAO1	nonsynonymous SNV	rs759775512			0		1970	2	1968	0.001015228
chr19	38572794	38572794	C	T	snp	exonic	SIPA1L3	nonsynonymous SNV	rs760346808			2.86E-05	6.67E-05	1970	2	1968	0.001015228
chr14	105518167	105518167	G	A	snp	exonic	GPR132	nonsynonymous SNV	rs763002172			1.79E-05		1970	2	1968	0.001015228
chr20	57415537	57415537	G	A	snp	exonic	GNAS	nonsynonymous SNV	rs763994300			9.10E-06		1970	2	1968	0.001015228
chr4	107956652	107956652	C	T	snp	exonic	DKK2	nonsynonymous SNV	rs867016839					1970	2	1968	0.001015228
chr6	167754978	167754978	G	A	snp	exonic	TTLL2	synonymous SNV	rs367727910			8.95E-06	0	1969	2	1967	0.001015744
chr1	228548308	228548308	G	A	snp	exonic	OBSCN	nonsynonymous SNV	rs750218635			0		1969	2	1967	0.001015744
chr9	34557571	34557571	G	A	snp	exonic	CNTFR	nonsynonymous SNV	rs771336868			0		1969	2	1967	0.001015744
chr2	242742905	242742905	C	T	snp	exonic	GAL3ST2	nonsynonymous SNV	rs143165919			4.58E-05	0.0001	1968	2	1966	0.00101626
chr1	228528447	228528447	G	A	snp	exonic	OBSCN	nonsynonymous SNV	rs556558311			0	0	1968	2	1966	0.00101626
chr1	214171118	214171118	G	A	snp	exonic	PROX1	nonsynonymous SNV	rs752227508			0	0	1968	2	1966	0.00101626
chr17	54588022	54588022	G	A	snp	intergenic	ANKFN1;NOG		rs779746862			1.99E-05	0	1968	2	1966	0.00101626
chr1	152192465	152192465	C	T	snp	exonic	HRNR	nonsynonymous SNV	rs769962080			8.95E-06	6.68E-05	1969	2	1966	0.00101626
chr11	70033923	70033923	A	T	snp	exonic	ANO1	nonsynonymous SNV	rs370788909			2.78E-05	0	1967	2	1965	0.001016777
chr8	30210180	30210180	A	T	snp	intergenic	DCTN6;RBPMS-AS1		rs545552229					1967	2	1965	0.001016777
chr7	114655866	114655866	C	T	snp	exonic	MDFIC	synonymous SNV	rs552071640			8.97E-06	0	1967	2	1965	0.001016777
chr1	109793912	109793912	A	G	snp	exonic	CELSR2	nonsynonymous SNV	rs745646802			8.95E-06		1967	2	1965	0.001016777
chr16	89355035	89355035	G	T	snp	exonic	ANKRD11	nonsynonymous SNV	rs773258799			0		1967	2	1965	0.001016777
chr1	245848962	245848962	G	A	snp	exonic	KIF26B	nonsynonymous SNV	rs779033703			9.04E-06	6.67E-05	1967	2	1965	0.001016777
chr12	132325334	132325334	C	T	snp	exonic	MMP17	synonymous SNV	rs138755759			9.18E-06	0	1966	2	1964	0.001017294
chr10	72195231	72195231	C	T	snp	exonic	NODAL	synonymous SNV	rs755206267			8.95E-06		1966	2	1964	0.001017294
chr16	84902415	84902415	T	C	snp	intronic	CRISPLD2		rs756402664			0		1966	2	1964	0.001017294
chr11	72539780	72539780	T	C	snp	exonic	ATG16L2	synonymous SNV	rs764805382			1.79E-05		1966	2	1964	0.001017294
chr19	42482228	42482228	C	T	snp	intronic	ATP1A3		rs782149339			8.95E-06		1966	2	1964	0.001017294
chr15	40587291	40587291	G	A	snp	intronic	PLCB2		rs775631098			0		1967	2	1964	0.001017294
chr19	45322723	45322723	C	T	snp	exonic	BCAM	nonsynonymous SNV	rs779640046			1.79E-05		1967	2	1964	0.001017294
chr11	1031972	1031972	G	A	snp	exonic	MUC6	nonsynonymous SNV	rs372014357			5.38E-05	0	1965	2	1963	0.001017812
chr19	57133294	57133294	G	C	snp	exonic	ZNF71	synonymous SNV	rs763196663			0		1965	2	1963	0.001017812
chr4	41984445	41984445	C	T	snp	exonic	DCAF4L1	synonymous SNV	rs769406636			8.95E-06		1965	2	1963	0.001017812
chr11	3681028	3681028	G	A	snp	exonic	ART1	stopgain	rs770958799			0		1965	2	1963	0.001017812
chr5	53815286	53815286	G	A	snp	exonic	SNX18	nonsynonymous SNV	rs142046953					1964	2	1962	0.00101833
chr22	19484930	19484930	C	T	snp	exonic	CDC45	synonymous SNV	rs746517643			0		1964	2	1962	0.00101833
chr6	159653959	159653959	C	T	snp	exonic	FNDC1	synonymous SNV	rs756458027			9.20E-06		1964	2	1962	0.00101833
chr3	142277459	142277459	C	T	snp	intronic	ATR		rs74282951	Uncertain significance	Seckel_syndrome	1.79E-05	0	2945	3	2942	0.001018676
chr20	57415543	57415543	G	A	snp	exonic	GNAS	nonsynonymous SNV	rs201893644			9.09E-06		1963	2	1961	0.001018849
chr4	651257	651257	G	A	snp	exonic	PDE6B	nonsynonymous SNV	rs368069770			2.70E-05		1963	2	1961	0.001018849
chr11	4411449	4411449	C	A	snp	exonic	TRIM21	nonsynonymous SNV	rs376066276			8.96E-06		1963	2	1961	0.001018849
chr7	100676607	100676607	G	A	snp	exonic	MUC17	nonsynonymous SNV	rs547503221			8.96E-06		1963	2	1961	0.001018849
chr21	46228985	46228985	T	C	snp	exonic	SUMO3	nonsynonymous SNV	rs751308919			8.95E-06		1963	2	1961	0.001018849
chr10	88416943	88416943	G	A	snp	intronic	OPN4		rs778346973			9.16E-06		1963	2	1961	0.001018849
chr8	144776490	144776490	C	T	snp	exonic	ZNF707	synonymous SNV	rs372139377			0	0	1962	2	1960	0.001019368
chr15	23811909	23811909	G	A	snp	exonic	MKRN3	nonsynonymous SNV	rs768002621			1.79E-05		1962	2	1960	0.001019368
chr20	57428479	57428479	G	A	snp	exonic	GNAS	synonymous SNV	rs774600473			3.08E-05		1962	2	1960	0.001019368
chrX	153593005	153593005	C	T	snp	exonic	FLNA	synonymous SNV	rs782428502			1.25E-05		1962	2	1960	0.001019368
chr12	113403749	113403749	C	T	snp	exonic	OAS3	synonymous SNV	rs745716678			0		1963	2	1960	0.001019368
chr8	123964798	123964798	G	A	snp	exonic	ZHX2	nonsynonymous SNV	rs375789703			9.86E-05	6.67E-05	1961	2	1959	0.001019888
chr1	228473864	228473864	G	A	snp	exonic	OBSCN	synonymous SNV	rs549760759			1.81E-05	0	1961	2	1959	0.001019888
chr14	106926355	106926355	C	A	snp	intergenic	LINC00226;LINC00221		rs752990359			0		1961	2	1959	0.001019888
chr12	113403750	113403750	C	T	snp	exonic	OAS3	nonsynonymous SNV	rs771904071			1.79E-05		1961	2	1959	0.001019888
chr8	144775968	144775968	G	T	snp	exonic	ZNF707	synonymous SNV	rs782076032			0		1961	2	1959	0.001019888
chr6	292619	292619	C	T	snp	intronic	DUSP22		rs192483045				0	1960	2	1958	0.001020408
chr12	95611606	95611606	C	T	snp	UTR5	VEZT		rs529961383			1.08E-05		1960	2	1958	0.001020408
chr19	39914782	39914782	C	T	snp	exonic	PLEKHG2	synonymous SNV	rs138826809			0.0001	6.67E-05	1959	2	1957	0.001020929
chr20	44592205	44592205	C	T	snp	exonic	ZNF335	synonymous SNV	rs536274112					1959	2	1957	0.001020929
chr1	152191362	152191362	G	A	snp	exonic	HRNR	nonsynonymous SNV	rs573793519			0.0001	6.72E-05	1959	2	1957	0.001020929
chr16	20410495	20410495	C	T	snp	exonic	PDILT	nonsynonymous SNV	rs767360839			2.69E-05		1959	2	1957	0.001020929
chr1	229730617	229730617	G	A	snp	exonic	TAF5L	synonymous SNV	rs777759268			8.06E-05	6.67E-05	1960	2	1957	0.001020929
chr1	228548319	228548319	C	T	snp	exonic	OBSCN	nonsynonymous SNV	rs376200518			0	0	1958	2	1956	0.00102145
chr7	149557984	149557984	C	A	snp	exonic	ZNF862	nonsynonymous SNV	rs750277060			4.48E-05		1958	2	1956	0.00102145
chr6	158454581	158454581	G	A	snp	exonic	SYNJ2	nonsynonymous SNV	rs756166754			1.79E-05		1958	2	1956	0.00102145
chr1	6648341	6648341	G	A	snp	exonic	ZBTB48	nonsynonymous SNV	rs773940991			9.07E-06		1958	2	1956	0.00102145
chr19	19613258	19613258	G	A	snp	exonic	GATAD2A	nonsynonymous SNV	rs866971926					1958	2	1956	0.00102145
chr5	140811655	140811655	A	G	snp	exonic	PCDHGA12	synonymous SNV	rs144317211			0		1957	2	1955	0.001021972
chr7	100175853	100175853	G	A	snp	exonic	LRCH4	nonsynonymous SNV	rs187288824			8.96E-06		1957	2	1955	0.001021972
chr19	1005407	1005407	C	T	snp	exonic	GRIN3B	nonsynonymous SNV	rs200178820			3.58E-05	6.67E-05	1957	2	1955	0.001021972
chr12	122255844	122255844	C	T	snp	intronic	SETD1B		rs570112955			0	0	1957	2	1955	0.001021972
chr2	128367128	128367128	A	G	snp	exonic	MYO7B	synonymous SNV	rs760499521			0	0	1957	2	1955	0.001021972
chr3	183956417	183956417	G	A	snp	exonic	VWA5B2	nonsynonymous SNV	rs767287777			3.41E-05		1957	2	1955	0.001021972
chr1	3328630	3328630	G	A	snp	exonic	PRDM16	synonymous SNV	rs778188314			9.22E-06	0	1957	2	1955	0.001021972
chr9	109690926	109690926	G	A	snp	exonic	ZNF462	nonsynonymous SNV	rs147201759			0		1958	2	1955	0.001021972
chr4	9783985	9783985	C	T	snp	exonic	DRD5	nonsynonymous SNV	rs201570391			0		1956	2	1954	0.001022495
chr20	2312895	2312895	C	T	snp	exonic	TGM3	synonymous SNV	rs34234428			0.0006	0.0007	1956	2	1954	0.001022495
chr13	113795277	113795277	T	C	snp	exonic	F10	nonsynonymous SNV	rs758151487			8.06E-05	0	1956	2	1954	0.001022495
chr22	24466853	24466853	G	A	snp	exonic	CABIN1	nonsynonymous SNV	rs761512341			8.95E-06		1956	2	1954	0.001022495
chr12	57623458	57623458	A	C	snp	UTR5	SHMT2		rs776274322					1956	2	1954	0.001022495
chr7	75617288	75617288	A	G	snp	exonic	TMEM120A	unknown	rs782017158			9.82E-06		1956	2	1954	0.001022495
chr9	139820299	139820299	C	T	snp	exonic	TRAF2	synonymous SNV	rs150502565			2.69E-05	0	1955	2	1953	0.001023018
chr9	35062127	35062127	G	A	snp	exonic	VCP	synonymous SNV	rs377316335	Uncertain significance	not_specified	8.95E-06	6.67E-05	1955	2	1953	0.001023018
chr9	91616623	91616623	G	A	snp	exonic	S1PR3	nonsynonymous SNV	rs746355071			8.98E-06		1955	2	1953	0.001023018
chr3	45811656	45811656	G	A	snp	intronic	SLC6A20		rs749763923			1.81E-05		1955	2	1953	0.001023018
chr19	57839936	57839936	G	A	snp	exonic	ZNF543	nonsynonymous SNV	rs753255816			0		1955	2	1953	0.001023018
chr3	195515853	195515853	C	T	snp	exonic	MUC4	synonymous SNV	rs755050933			0		1955	2	1953	0.001023018
chr19	19162917	19162917	C	T	snp	exonic	ARMC6	nonsynonymous SNV	rs761737299			0		1955	2	1953	0.001023018
chr2	149247325	149247325	C	T	snp	exonic	MBD5	nonsynonymous SNV	rs767306594			0		1955	2	1953	0.001023018
chr16	67974231	67974231	C	T	snp	exonic	LCAT	nonsynonymous SNV	rs770469492			0.0001	0	1955	2	1953	0.001023018
chr3	49152646	49152646	G	A	snp	intronic	USP19		rs771303401			0		1955	2	1953	0.001023018
chr19	40895567	40895567	G	A	snp	exonic	HIPK4	synonymous SNV	rs139865361			1.79E-05	6.67E-05	1954	2	1952	0.001023541
chr3	43122119	43122119	G	A	snp	exonic	POMGNT2	nonsynonymous SNV	rs61753919			0	0	1954	2	1952	0.001023541
chr4	11401107	11401107	C	T	snp	exonic	HS3ST1	nonsynonymous SNV	rs757811788			1.80E-05		1954	2	1952	0.001023541
chr19	9271877	9271877	C	T	snp	exonic	ZNF317	nonsynonymous SNV	rs771360298			8.96E-06		1954	2	1952	0.001023541
chr22	50278258	50278258	G	A	snp	exonic	ZBED4	synonymous SNV	rs772292224			0	0	1954	2	1952	0.001023541
chr1	94344642	94344642	G	A	snp	exonic	DNTTIP2	synonymous SNV	rs776644662			0		1954	2	1952	0.001023541
chr9	91616506	91616506	G	A	snp	exonic	S1PR3	nonsynonymous SNV	rs564201526			0		1955	2	1952	0.001023541
chr4	54231729	54231729	T	G	snp	exonic	SCFD2	nonsynonymous SNV	rs774402866			9.00E-06		1955	2	1952	0.001023541
chr16	830432	830432	C	T	snp	intergenic	MIR662;RPUSD1		rs374194452			0.0001	0	1953	2	1951	0.001024066
chr17	75085421	75085421	C	A	snp	ncRNA_exonic	SCARNA16		rs531414183					1953	2	1951	0.001024066
chr12	70004542	70004542	C	T	snp	exonic	LRRC10	nonsynonymous SNV	rs751287791			1.79E-05		1953	2	1951	0.001024066
chr19	45872265	45872265	C	T	snp	intronic	ERCC2		rs753539310			1.79E-05		1953	2	1951	0.001024066
chr16	11370190	11370190	G	A	snp	exonic	PRM2	nonsynonymous SNV	rs765639264			1.79E-05		1953	2	1951	0.001024066
chr8	144945459	144945459	C	T	snp	exonic	EPPK1	nonsynonymous SNV	rs782210706			9.04E-06		1953	2	1951	0.001024066
chr11	111784406	111784406	C	T	snp	exonic	HSPB2	synonymous SNV	rs782751614			8.96E-06		1953	2	1951	0.001024066
chr1	11561813	11561813	G	T	snp	exonic	DISP3	nonsynonymous SNV	rs761509343			1.06E-05		1954	2	1951	0.001024066
chr22	40803471	40803471	G	A	snp	exonic	SGSM3	nonsynonymous SNV	rs140993538			1.81E-05	0	1952	2	1950	0.00102459
chr3	52522513	52522513	G	A	snp	exonic	NISCH	nonsynonymous SNV	rs200440036			1.81E-05	0	1952	2	1950	0.00102459
chr1	228473863	228473863	C	T	snp	exonic	OBSCN	nonsynonymous SNV	rs529612822			2.72E-05		1952	2	1950	0.00102459
chr1	57341829	57341829	C	T	snp	exonic	C8A	synonymous SNV	rs766644316			9.00E-06		1952	2	1950	0.00102459
chr11	128781254	128781254	C	A	snp	exonic	KCNJ5	nonsynonymous SNV	rs863224689	Uncertain significance	Long_QT_syndrome	8.95E-06		1952	2	1950	0.00102459
chr1	27333161	27333161	C	T	snp	exonic	FAM46B	synonymous SNV	rs368538834					2927	3	2924	0.00102494
chr8	28608284	28608284	C	T	snp	exonic	EXTL3	synonymous SNV	rs143878878			0.0001	0.0002	1951	2	1949	0.001025115
chr20	18296290	18296290	G	A	snp	exonic	ZNF133	synonymous SNV	rs748176290			2.69E-05	0	1952	2	1949	0.001025115
chr22	42486711	42486711	G	A	snp	exonic	NDUFA6	nonsynonymous SNV	rs201118326			0		1950	2	1948	0.001025641
chr20	44463707	44463707	C	T	snp	exonic	SNX21	synonymous SNV	rs370207536			4.48E-05	6.67E-05	1950	2	1948	0.001025641
chr19	36980977	36980977	T	C	snp	ncRNA_exonic	LOC728752		rs555811212			0	0	1950	2	1948	0.001025641
chr3	69230327	69230327	G	A	snp	exonic	FRMD4B	synonymous SNV	rs780173818			3.58E-05	0	1950	2	1948	0.001025641
chr3	45811741	45811741	G	A	snp	exonic	SLC6A20	nonsynonymous SNV	rs145795590			8.95E-06	0	1949	2	1947	0.001026167
chr5	56777982	56777982	C	T	snp	exonic	ACTBL2	nonsynonymous SNV	rs527573101			0		1949	2	1947	0.001026167
chr17	3214428	3214428	A	G	snp	ncRNA_exonic	OR3A4P		rs770545345			0		1949	2	1947	0.001026167
chr11	7111275	7111275	C	T	snp	exonic	RBMXL2	synonymous SNV	rs776242098			0		1949	2	1947	0.001026167
chr21	47664941	47664941	G	A	snp	exonic	MCM3AP	synonymous SNV	rs749280742			8.96E-06		1950	2	1947	0.001026167
chr19	39076721	39076721	C	T	snp	intronic	RYR1		rs763199559			8.96E-06		1948	2	1946	0.001026694
chr1	11561908	11561908	C	A	snp	exonic	DISP3	nonsynonymous SNV	rs773359901			3.61E-05		1948	2	1946	0.001026694
chr9	121930197	121930197	T	C	snp	exonic	BRINP1	nonsynonymous SNV	rs749693859			8.95E-06		1949	2	1946	0.001026694
chr1	145561607	145561607	C	T	snp	exonic	ANKRD35	nonsynonymous SNV	rs138067247			1.80E-05		1947	2	1945	0.001027221
chr1	109812413	109812413	G	A	snp	exonic	CELSR2	nonsynonymous SNV	rs754848798			0		1947	2	1945	0.001027221
chr1	20639395	20639395	G	A	snp	exonic	VWA5B1	nonsynonymous SNV	rs771288297			3.46E-05	0.0001	1947	2	1945	0.001027221
chr12	122079465	122079465	C	T	snp	exonic	ORAI1	synonymous SNV	rs782201078			0		1947	2	1945	0.001027221
chr11	2424104	2424104	C	T	snp	exonic	TSSC4	nonsynonymous SNV	rs763999896			9.10E-06	0	1948	2	1945	0.001027221
chr9	115652236	115652236	G	A	snp	exonic	SLC46A2	synonymous SNV	rs114822090			1.79E-05	6.67E-05	1946	2	1944	0.001027749
chr19	4511361	4511361	C	T	snp	exonic	PLIN4	nonsynonymous SNV	rs199505764			5.38E-05	0	1946	2	1944	0.001027749
chr22	32108275	32108275	C	T	snp	exonic	PRR14L	synonymous SNV	rs368863138			8.97E-06		1946	2	1944	0.001027749
chr11	132527046	132527046	C	T	snp	exonic	OPCML	synonymous SNV	rs369569350			4.48E-05	0	1946	2	1944	0.001027749
chr22	32108299	32108299	G	A	snp	exonic	PRR14L	synonymous SNV	rs372890284			1.80E-05	0	1946	2	1944	0.001027749
chr17	80000553	80000553	G	A	snp	intergenic	DCXR;RFNG		rs551227429					1946	2	1944	0.001027749
chr2	98275892	98275892	C	T	snp	exonic	ACTR1B	nonsynonymous SNV	rs750638059			0	0	1946	2	1944	0.001027749
chr1	109812365	109812365	C	T	snp	exonic	CELSR2	nonsynonymous SNV	rs763359747			0		1946	2	1944	0.001027749
chr5	88018568	88018568	G	A	snp	exonic	MEF2C	synonymous SNV	rs769578827			8.96E-06		1946	2	1944	0.001027749
chr22	50279895	50279895	G	A	snp	exonic	ZBED4	nonsynonymous SNV	rs774073293			0		2919	3	2916	0.001027749
chr3	195511033	195511033	A	G	snp	exonic	MUC4	nonsynonymous SNV	rs200807157			1.99E-05	0.0038	1945	2	1943	0.001028278
chr14	34268983	34268983	C	T	snp	exonic	NPAS3	synonymous SNV	rs374909389			0		1945	2	1943	0.001028278
chr14	76906014	76906014	C	T	snp	exonic	ESRRB	synonymous SNV	rs376300660			0	0	1945	2	1943	0.001028278
chr11	75282984	75282984	C	T	snp	exonic	SERPINH1	synonymous SNV	rs533870576			1.79E-05		1945	2	1943	0.001028278
chr12	108912308	108912308	G	A	snp	exonic	FICD	nonsynonymous SNV	rs778841180			0		1945	2	1943	0.001028278
chr1	245848940	245848940	C	A	snp	exonic	KIF26B	synonymous SNV	rs190318015			6.32E-05	0.0001	1946	2	1943	0.001028278
chr11	7110448	7110448	C	T	snp	exonic	RBMXL2	nonsynonymous SNV	rs746444711			9.04E-06		1946	2	1943	0.001028278
chr19	35769938	35769938	C	T	snp	exonic	USF2	synonymous SNV	rs777682325			0	0	1946	2	1943	0.001028278
chr16	89354978	89354978	G	A	snp	exonic	ANKRD11	synonymous SNV	rs192798250			0.0003	0.0002	1944	2	1942	0.001028807
chr15	86311682	86311682	T	C	snp	exonic	KLHL25	nonsynonymous SNV	rs760483012			8.96E-06		1944	2	1942	0.001028807
chr18	24127356	24127356	C	T	snp	exonic	KCTD1	nonsynonymous SNV	rs764755160			0		1944	2	1942	0.001028807
chr1	17023401	17023401	A	G	snp	ncRNA_exonic	ESPNP		rs766525998			2.70E-05		1944	2	1942	0.001028807
chr16	20410482	20410482	C	T	snp	exonic	PDILT	synonymous SNV	rs769400859			1.79E-05		1944	2	1942	0.001028807
chr7	100682876	100682876	G	A	snp	exonic	MUC17	nonsynonymous SNV	rs776889584			1.90E-05	0.0001	1944	2	1942	0.001028807
chr12	133324499	133324499	C	T	snp	exonic	ANKLE2	nonsynonymous SNV	rs780059251			9.12E-06		1944	2	1942	0.001028807
chr21	43523904	43523904	C	T	snp	ncRNA_exonic	UMODL1-AS1		rs780454323			1.83E-05	6.67E-05	1944	2	1942	0.001028807
chr1	179054831	179054831	G	A	snp	exonic	TOR3A	nonsynonymous SNV	rs367964789			1.79E-05		1943	2	1941	0.001029336
chr14	21992620	21992620	G	A	snp	exonic	SALL2	synonymous SNV	rs748931784			8.95E-06		1943	2	1941	0.001029336
chr1	33613003	33613003	C	T	snp	exonic	TRIM62	synonymous SNV	rs750517338			0	0	1943	2	1941	0.001029336
chr22	29834990	29834990	G	A	snp	exonic	RFPL1	synonymous SNV	rs767652890			0	0	1943	2	1941	0.001029336
chr1	121485324	121485324	A	G	snp	intergenic	EMBP1;NONE		rs28971233					1944	2	1941	0.001029336
chr1	44445809	44445809	C	T	snp	intronic	B4GALT2		rs374817381					1944	2	1941	0.001029336
chr2	238285634	238285634	T	C	snp	exonic	COL6A3	nonsynonymous SNV	rs771558308			0		1944	2	1941	0.001029336
chr11	125831725	125831725	G	A	snp	exonic	CDON	synonymous SNV	rs576546439			3.58E-05	6.66E-05	1942	2	1940	0.001029866
chr1	89528787	89528787	A	G	snp	exonic	GBP1	nonsynonymous SNV	rs757921700			3.58E-05	6.66E-05	1942	2	1940	0.001029866
chr16	30365203	30365203	G	A	snp	intronic	CD2BP2		rs764182039			3.60E-05		1942	2	1940	0.001029866
chr3	186335150	186335150	A	G	snp	intronic	AHSG		rs867998093					1942	2	1940	0.001029866
chrX	70823746	70823746	G	A	snp	exonic	GCNA	nonsynonymous SNV	rs761216831			1.25E-05		2913	3	2910	0.001029866
chr9	127119100	127119100	C	T	snp	exonic	PSMB7	nonsynonymous SNV	rs150588064			1.83E-05	0	1941	2	1939	0.001030397
chr11	68153989	68153989	G	A	snp	exonic	LRP5	synonymous SNV	rs150970251			0.0001	6.68E-05	1941	2	1939	0.001030397
chr19	1360226	1360226	G	A	snp	exonic	MUM1	synonymous SNV	rs139588178			0.0001	0.0001	1940	2	1938	0.001030928
chr7	100677007	100677007	T	C	snp	exonic	MUC17	synonymous SNV	rs747455039			0		1940	2	1938	0.001030928
chr2	11728913	11728913	G	A	snp	exonic	GREB1	nonsynonymous SNV	rs762189160			2.69E-05		1940	2	1938	0.001030928
[truncated: 451,633+ more rows]
